# Supplementary material for: Gene Expression in Peripheral Immune Cells following Cardioembolic Stroke Is Sexually Dimorphic
Source: PLoS One. 2014 Jul 18;9(7):e102550. doi: 10.1371/journal.pone.0102550 (PMC4103830; doi:10.1371/journal.pone.0102550)
Supplement: File S2 — Supplementary Tables. Table S1, differentially expressed genes at 3 h, 5 h, and 24 h following cardioembolic stroke. Table S2, significantly enriched canonical pathways at 3 h, 5 h, and 24 h following cardioembolic stroke in male and female. Table S3, significantly enriched disease and function categories at 3 h following cardioembolic stroke in female and in male. Table S4, significantly enriched upstream regulators at 3 h following cardioembolic stroke in female and in male. (XLSX) [file pone.0102550.s002.xlsx]

## Sheet: TableS1
TABLE S1. DIFFERENTIALLY EXPRESSED GENES AT 3h, 5h AND 24h FOLLOWING CARDIOEMBOLIC STROKE (FEMALE-SPECIFIC, MALE-SPECIFIC AND COMMON)
3h_CommonToFemaleAndMale
		FDR p-value	Fold-Change	FDR p-value	Fold-Change
Probe Set ID	Gene Symbol_1	CE-Stroke * F vs. VRF-Control * F	CE-Stroke * F vs. VRF-Control * F	CE-Stroke * M vs. VRF-Control * M	CE-Stroke * M vs. VRF-Control * M
244723_at	ACSM2A	0.00101298	-13.267	0.00267795	-11.1693
209934_s_at	ATP2C1	0.0355278	1.46444	0.0261641	1.68097
202961_s_at	ATP5J2	0.00228303	1.98201	0.0375789	1.60518
208860_s_at	ATRX	0.033299	2.04308	0.0428087	2.17288
201882_x_at	B4GALT1	0.00551857	2.25362	0.0215837	2.1251
1557548_at	C10orf108	0.0109411	-4.31376	0.047975	-3.58399
1555364_at	C11orf58	0.00238592	-6.58258	0.0319836	-4.01696
1555365_x_at	C11orf58	0.00202766	-5.06495	0.0125691	-4.10209
225404_at	C1orf212	0.0119019	1.88094	0.0344886	1.82357
223157_at	C4orf14	0.0377659	1.53491	0.0242355	1.79428
226159_at	C5orf51	0.035386	1.54468	0.0297659	1.75957
238034_at	CANX	0.00973992	1.78009	0.0147668	1.89431
205988_at	CD84	0.0403083	1.92784	0.0297659	2.43109
218198_at	DHX32	0.0297657	1.96594	0.0424642	2.07356
202441_at	ERLIN1	0.0070222	2.11054	0.0386507	1.85133
239481_at	FAM133A	0.007647	-4.26127	0.0386507	-3.37814
227002_at	FAM78A	0.0127009	-1.58321	0.0146739	-1.72699
215187_at	FLJ11292	0.00202766	-2.89192	0.0163275	-2.39665
214005_at	GGCX	0.0118025	2.00782	0.0242355	2.09232
1552315_at	GIMAP1	0.0278975	-1.74405	0.0386239	-1.84004
223488_s_at	GNB4	0.0183439	2.12962	0.0448728	2.0922
224415_s_at	HINT2	0.0119019	2.04711	0.0311983	2.01243
227744_s_at	HNRNPD	0.0127009	-2.70717	0.0377455	-2.54828
213567_at	KPNA4	0.0217504	1.74612	0.0297659	1.82428
1557961_s_at	LOC100127983	0.0296498	2.94866	0.0191732	4.10767
210386_s_at	LOC100510712 /// MTX1	0.0119019	2.09979	0.0386239	1.97989
1557094_at	LOC728449	0.00238592	-5.58331	0.0297659	-3.67095
234861_at	LOC93463	0.0455963	-2.21311	0.0387104	-2.78142
232283_at	LYSMD1	0.0384236	1.77049	0.0364924	2.03269
224689_at	MANBAL	0.0286478	1.59325	0.0304217	1.72872
224726_at	MIB1	0.0148772	1.72535	0.0157612	1.88977
230122_at	MLLT10	0.0171535	1.99903	0.0256489	2.12796
201994_at	MORF4L2	0.0455898	1.57491	0.0496454	1.74308
221253_s_at	MUTED /// TXNDC5	0.0339493	2.25888	0.044302	2.56111
208969_at	NDUFA9	0.0416587	1.52488	0.0370813	1.69819
211671_s_at	NR3C1	0.017453	1.77756	0.0297659	1.8776
213947_s_at	NUP210	0.0312205	-1.47872	0.0424642	-1.54863
227553_at	PIK3R5	0.010855	1.79543	0.0456107	1.66395
222253_s_at	POM121L9P	0.000541709	-12.9361	0.00267795	-9.7582
214375_at	PPFIBP1	0.00408682	-4.70022	0.0297659	-3.4765
206174_s_at	PPP6C	0.00551857	2.26021	0.0368347	1.88047
1564521_x_at	PRMT5	0.0270472	1.71008	0.0331248	1.87746
201198_s_at	PSMD1	0.0128177	1.85793	0.0424642	1.76062
231715_s_at	PYCR2	0.0141789	-1.99364	0.0215837	-2.16911
244124_at	RAB37	0.0134596	-2.07535	0.0424642	-1.97201
228548_at	RAP1A	0.0297657	1.90003	0.0485955	1.97022
206221_at	RASA3	0.00458943	-2.64604	0.0304682	-2.20915
1553186_x_at	RASEF	0.00752296	-2.73405	0.0493051	-2.15938
209441_at	RHOBTB2	0.010593	-2.36538	0.0292994	-2.2468
234243_at	RPF1	0.0338949	-2.75083	0.0318674	-3.57793
213491_x_at	RPN2	0.023153	1.54413	0.0377455	1.56601
211565_at	SH3GL3	0.00202766	-7.21579	0.0125691	-5.50461
207570_at	SHOX	0.0104594	-4.00527	0.0269367	-3.9867
215714_s_at	SMARCA4	0.0108136	-1.56896	0.0297659	-1.5528
232547_at	SRCIN1	0.00162598	-7.46815	0.0375789	-3.67468
215044_s_at	STAM2	0.0312205	1.78933	0.0424642	1.93903
221499_s_at	STX16	0.0108136	2.30367	0.0424642	2.09844
206740_x_at	SYCP1	0.0104102	-2.57003	0.0165544	-2.72548
202339_at	SYMPK	0.0485113	-1.35632	0.044302	-1.46265
242939_at	TFDP1	0.0352826	2.13089	0.0344886	2.56131
210800_at	TIMM8A	0.00148187	-8.9615	0.0103706	-6.29833
201078_at	TM9SF2	0.00936962	1.81272	0.0382124	1.65873
223031_s_at	TRAF7	0.0140695	-2.02944	0.023333	-2.11129
201399_s_at	TRAM1	0.00202766	2.03516	0.0297659	1.66758
201434_at	TTC1	0.00458943	1.70254	0.0285813	1.55755
201899_s_at	UBE2A	0.0297657	1.55213	0.0366027	1.67548
226899_at	UNC5B	0.00408682	-4.74218	0.0496454	-2.99908
226730_s_at	USP37	0.0364592	1.83936	0.0297659	2.22142
208845_at	VDAC3	0.0104594	1.49674	0.0364924	1.41525
1555938_x_at	VIM	0.03075	2.53844	0.0386497	2.93016
224711_at	YY1	0.0432099	1.44242	0.0375789	1.56802
3h_Female
		FDR p-value	Fold-Change
Probe Set ID	Gene Symbol_1	CE-Stroke * F vs. VRF-Control * F	CE-Stroke * F vs. VRF-Control * F
210852_s_at	AASS	0.0171535	-3.74392
216066_at	ABCA1	0.0371879	2.25751
218739_at	ABHD5	0.0342676	2.34532
221679_s_at	ABHD6	0.0477109	-1.94528
205364_at	ACOX2	0.0431364	2.27547
244723_at	ACSM2A	0.00101298	-13.267
89977_at	ACSM5	0.00658797	-3.14779
1554390_s_at	ACTR2	0.0431898	1.93604
200727_s_at	ACTR2	0.00973992	2.20586
224424_x_at	ACTR3BP2	0.0266299	-2.89048
224425_x_at	ACTR3BP2	0.0352826	-2.74993
224426_s_at	ACTR3BP2	0.03916	-2.1091
205209_at	ACVR1B	0.017453	1.9541
202604_x_at	ADAM10	0.0432099	1.73354
209765_at	ADAM19	0.0492712	1.54509
226071_at	ADAMTSL4	0.0373815	2.16055
230800_at	ADCY4	0.0187506	2.18351
201346_at	ADIPOR2	0.02429	1.62006
217939_s_at	AFTPH	0.0278975	1.52447
218091_at	AGFG1	0.0312205	1.94272
220199_s_at	AIDA	0.0278975	2.26246
212543_at	AIM1	0.0242161	1.32901
218064_s_at	AKAP8L	0.044951	-1.93381
223145_s_at	AKIRIN2	0.0108136	1.9216
211617_at	ALDOAP2	0.0163377	-3.48095
204446_s_at	ALOX5	0.0339557	1.84601
207690_at	ALX3	0.0339493	-1.93582
52731_at	AMBRA1	0.049647	-1.35243
224810_s_at	ANKRD13A	0.0305499	1.57717
238439_at	ANKRD22	0.0227313	4.78827
239196_at	ANKRD22	0.0315624	4.91172
1561079_at	ANKRD28	0.00984158	-4.14614
201012_at	ANXA1	0.037218	2.00555
209860_s_at	ANXA7	0.00551857	1.79496
209870_s_at	APBA2	0.0463548	-1.95946
221036_s_at	APH1B	0.0158843	2.05019
208248_x_at	APLP2	0.0322877	1.56885
208704_x_at	APLP2	0.0174938	1.6786
202631_s_at	APPBP2	0.0404535	1.55512
39249_at	AQP3	0.0401054	-1.88781
205568_at	AQP9	0.0333605	1.71999
231662_at	ARG1	0.0479295	4.41654
206177_s_at	ARG1	0.0370584	6.37557
211935_at	ARL6IP1	0.0275313	1.45285
213513_x_at	ARPC2	0.020877	1.47179
221483_s_at	ARPP19	0.0255793	1.46719
224796_at	ASAP1	0.0412029	1.66632
224790_at	ASAP1	0.0324912	2.28398
226513_at	ASB7	0.0479295	1.52448
209517_s_at	ASH2L	0.0391493	1.36078
1554816_at	ASTN2	0.0285646	-2.58256
203952_at	ATF6	0.0322877	1.61616
226941_at	ATF6	0.0165291	1.78854
218673_s_at	ATG7	0.0294031	1.78298
40489_at	ATN1	0.0473844	-1.64425
1564064_a_at	ATP11B	0.0227313	1.86439
209934_s_at	ATP2C1	0.0355278	1.46444
201322_at	ATP5B	0.00315347	1.65634
217801_at	ATP5E	0.0444816	1.61249
210149_s_at	ATP5H	0.0303728	1.55738
202961_s_at	ATP5J2	0.00228303	1.98201
208746_x_at	ATP5L	0.0131554	1.81351
210453_x_at	ATP5L	0.0127009	1.82051
207573_x_at	ATP5L	0.0126486	1.88631
200096_s_at	ATP6V0E1	0.0355278	1.51446
208898_at	ATP6V1D	0.01551	1.65327
208860_s_at	ATRX	0.033299	2.04308
203232_s_at	ATXN1	0.0211182	1.65878
217321_x_at	ATXN3	0.049647	-2.15301
204092_s_at	AURKA	0.0203312	1.93617
210205_at	B3GALT4	0.0373717	1.66298
201882_x_at	B4GALT1	0.00551857	2.25362
203051_at	BAHD1	0.0461547	-1.43407
203080_s_at	BAZ2B	0.0387574	1.98472
205681_at	BCL2A1	0.037578	2.94167
223915_at	BCOR	0.00805227	-1.86417
208946_s_at	BECN1	0.00809126	1.51143
202095_s_at	BIRC5	0.03916	2.61891
226853_at	BMP2K	0.0452812	1.79415
206464_at	BMX	0.03075	3.79581
41512_at	BRAP	0.0383661	1.54393
223376_s_at	BRI3	0.0108796	1.94494
202427_s_at	BRP44	0.00973992	1.68004
1557548_at	C10orf108	0.0109411	-4.31376
1555364_at	C11orf58	0.00238592	-6.58258
1555365_x_at	C11orf58	0.00202766	-5.06495
202279_at	C14orf2	0.0384303	2.14129
210532_s_at	C14orf2	0.031735	2.31002
205781_at	C16orf7	0.0127009	2.16401
225183_at	C16orf72	0.0355278	1.5388
228373_at	C16orf72	0.0174938	1.78189
1557206_at	C17orf104	0.0433743	-3.33236
1566480_x_at	C17orf104	0.04035	-2.1156
221190_s_at	C18orf8	0.019943	1.53796
219097_x_at	C19orf42	0.0435529	1.55457
229650_s_at	C19orf42	0.0455257	1.63214
224717_s_at	C19orf42	0.0131952	1.99863
235568_at	C19orf59	0.0162089	3.99576
213985_s_at	C19orf6	0.0163377	-1.87825
212574_x_at	C19orf6	0.0492712	-1.54165
228532_at	C1orf162	0.0442229	1.48794
219420_s_at	C1orf163	0.0227313	2.0712
225404_at	C1orf212	0.0119019	1.88094
218448_at	C20orf11	0.0492712	1.52
217835_x_at	C20orf24	0.020873	1.68946
224376_s_at	C20orf24	0.027964	1.69938
206656_s_at	C20orf3	0.0070222	1.80816
234926_s_at	C20orf43	0.0352826	1.59526
217737_x_at	C20orf43	0.0353243	1.76599
224575_at	C3orf10	0.0488482	1.30625
226891_at	C3orf21	0.0308019	1.80561
201677_at	C3orf37	0.0497341	-1.64589
241817_at	C3orf62	0.0494966	2.09139
223157_at	C4orf14	0.0377659	1.53491
224602_at	C4orf3	0.0209783	1.71924
238411_x_at	C5orf13	0.0235649	-3.90493
224707_at	C5orf32	0.0370341	1.98556
226159_at	C5orf51	0.035386	1.54468
1554486_a_at	C6orf114	0.0193661	-2.53744
233438_at	C6orf162	0.0286281	-2.75238
218008_at	C7orf42	0.0294253	1.64963
236013_at	CACNA1E	0.0436462	3.85179
210817_s_at	CALCOCO2	0.0364508	1.55527
46323_at	CANT1	0.0485113	1.70939
221732_at	CANT1	0.0352826	1.82245
238034_at	CANX	0.00973992	1.78009
1562368_at	CARD11	0.0353243	-1.91305
212971_at	CARS	0.021713	1.67856
207842_s_at	CASC3	0.019418	1.6255
1552689_at	CASKIN1	0.0251206	-1.85919
206011_at	CASP1	0.016756	1.83434
211366_x_at	CASP1	0.0462882	1.91415
211368_s_at	CASP1	0.0286478	1.92606
209970_x_at	CASP1	0.0275313	2.02659
1560599_a_at	CCDC123	0.040369	-1.85669
226515_at	CCDC127	0.0141789	2.16092
225523_at	CCDC142 /// MRPL53	0.0352826	1.67313
1557366_at	CCDC144B	0.0324912	-4.45541
1561271_at	CCDC144C	0.020877	-3.23191
228320_x_at	CCDC64	0.0227313	-1.87644
214710_s_at	CCNB1	0.0455257	2.53608
202705_at	CCNB2	0.0149471	3.17373
1554283_at	CCRN4L	0.0492307	1.73466
208653_s_at	CD164	0.031885	2.054
220674_at	CD22	0.0391493	-1.97335
204489_s_at	CD44	0.0403231	1.32551
204118_at	CD48	0.0473844	1.59296
1555950_a_at	CD55	0.0338428	2.01937
201926_s_at	CD55	0.0208878	2.10906
212463_at	CD59	0.0461059	1.76588
200983_x_at	CD59	0.0109411	2.62517
205297_s_at	CD79B	0.0286478	-2.06478
205988_at	CD84	0.0403083	1.92784
210895_s_at	CD86	0.0355278	2.0491
202878_s_at	CD93	0.0246506	1.68563
218157_x_at	CDC42SE1	0.0463548	1.50521
226661_at	CDCA2	0.043906	2.65654
215329_s_at	CDK11A /// CDK11B	0.0468842	-1.54348
212899_at	CDK19	0.0497341	1.67752
203973_s_at	CEBPD	0.0332172	1.92504
1554569_a_at	CELF2	0.037218	1.69556
234023_s_at	CENPJ	0.0461628	-2.36783
238535_at	CEP152	0.0461547	-2.09413
237367_x_at	CFLAR	0.0283404	1.96612
55093_at	CHPF2	0.0315728	2.22697
220210_at	CHRNA10	0.0497341	1.92779
200998_s_at	CKAP4	0.0307346	2.45076
223451_s_at	CKLF	0.0297657	1.91975
219161_s_at	CKLF	0.00774238	2.19032
221058_s_at	CKLF	0.0131484	2.55011
1552772_at	CLEC4D	0.03046	3.18769
1552773_at	CLEC4D	0.036952	3.19069
219859_at	CLEC4E	0.0296398	3.48551
219890_at	CLEC5A	0.0305499	3.42811
225759_x_at	CLMN	0.00973992	2.58582
221845_s_at	CLPB	0.0339048	1.76079
228437_at	CNIH4	0.03916	2.02426
223993_s_at	CNIH4	0.0174938	2.33231
218728_s_at	CNIH4	0.0193265	2.47726
217749_at	COPG	0.023775	1.66929
203880_at	COX17	0.0165179	2.08993
227363_s_at	COX4NB	0.0245453	1.65205
213736_at	COX5B	0.0141789	1.69076
201256_at	COX7A2L	0.0351142	1.39203
229600_s_at	CPD	0.0308019	1.94111
201940_at	CPD	0.023153	2.06827
201941_at	CPD	0.01551	2.13708
201942_s_at	CPD	0.0209783	2.81483
201943_s_at	CPD	0.00770008	2.86158
224828_at	CPEB4	0.0294013	3.05586
202119_s_at	CPNE3	0.0171535	1.45828
233563_s_at	CPSF3L	0.0432099	-1.68604
244313_at	CR1	0.0309132	2.21147
217484_at	CR1	0.0312205	2.37303
208488_s_at	CR1	0.0226039	2.83689
204313_s_at	CREB1	0.0287734	1.70654
214513_s_at	CREB1	0.0227313	1.7246
230511_at	CREM	0.021713	2.19762
221541_at	CRISPLD2	0.0491285	2.2264
1555889_a_at	CRTAP	0.0473004	1.62766
213091_at	CRTC1	0.0314914	-1.9885
219939_s_at	CSDE1	0.00967381	1.54948
222975_s_at	CSDE1	0.0222443	1.55453
220627_at	CST8	0.0408073	-2.08059
204971_at	CSTA	0.0171535	2.22675
1567912_s_at	CT45A1 /// CT45A2 /// CT45A3 /// CT45A4 /// CT45A5 /// CT45A6 /// LOC100133581	0.00523467	-15.5337
200035_at	CTDNEP1	0.0134596	1.60484
214377_s_at	CTRL	0.0472063	1.84685
203917_at	CXADR	0.0193661	-2.75304
223454_at	CXCL16	0.0315781	1.93213
216734_s_at	CXCR5	0.0462882	-1.46106
200046_at	DAD1	0.0159051	1.68376
222858_s_at	DAPP1	0.0455963	1.96745
222488_s_at	DCTN4	0.0171535	1.78298
217973_at	DCXR	0.035386	1.74989
215158_s_at	DEDD	0.0297657	1.36226
226659_at	DEF6	0.0427245	1.39181
219763_at	DENND1A	0.0491285	1.97232
209549_s_at	DGUOK	0.0455179	1.33539
218198_at	DHX32	0.0297657	1.96594
226026_at	DIRC2	0.0494966	1.83031
217208_s_at	DLG1	0.03916	-2.21573
209157_at	DNAJA2	0.017453	1.72412
218435_at	DNAJC15	0.0431364	1.90909
208499_s_at	DNAJC3	0.0477109	1.82159
203912_s_at	DNASE1L1	0.0286478	1.57317
219921_s_at	DOCK5	0.0173464	2.90998
223553_s_at	DOK3	0.0443784	1.76945
220939_s_at	DPP8	0.042604	1.55697
241199_x_at	DPPA4	0.0286478	-3.58715
201041_s_at	DUSP1	0.027964	2.09288
201999_s_at	DYNLT1	0.0298681	1.70416
218660_at	DYSF	0.0448905	2.03649
202623_at	EAPP	0.0354669	1.7428
201135_at	ECHS1	0.0491285	1.40443
216667_at	ECRP /// RNASE2	0.0294253	3.20333
220759_at	EDDM3B	0.0443784	1.608
213310_at	EIF2C2	0.0441905	2.44046
225941_at	EIF4E3	0.0146531	1.89952
225940_at	EIF4E3	0.0332285	2.31855
201766_at	ELAC2	0.0141789	-2.66351
31845_at	ELF4	0.0285646	1.70535
226789_at	EMB	0.00978934	1.54295
234464_s_at	EME1	0.0301792	1.46857
201325_s_at	EMP1	0.0480405	3.08137
203729_at	EMP3	0.0357375	1.49127
201231_s_at	ENO1	0.0108136	1.89429
243111_at	ENTPD1	0.0477214	1.92806
209473_at	ENTPD1	0.0148013	2.09515
1555826_at	EPR1	0.0303728	3.06498
224576_at	ERGIC1	0.0131554	1.7014
226416_at	ERI1	0.0415246	1.54352
202441_at	ERLIN1	0.0070222	2.11054
225750_at	ERO1L	0.0297657	1.61545
201573_s_at	ETF1	0.0167467	1.57222
201574_at	ETF1	0.0244881	1.60247
201931_at	ETFA	0.0352826	1.68088
211742_s_at	EVI2B	0.0408073	1.51176
58696_at	EXOSC4	0.0443784	1.41005
239198_at	EZH1	0.0461547	2.23116
204714_s_at	F5	0.0373815	2.36943
203274_at	F8A1 /// F8A2 /// F8A3	0.0152481	1.63291
218080_x_at	FAF1	0.0324698	2.19445
224783_at	FAM100B	0.0108136	2.01556
212400_at	FAM102A	0.021566	-2.32511
214947_at	FAM105A	0.0433743	2.00571
221267_s_at	FAM108A1	0.00914874	-1.8895
225395_s_at	FAM120AOS	0.02968	1.67283
239481_at	FAM133A	0.007647	-4.26127
222929_at	FAM160B2	0.0242161	-1.96183
222205_x_at	FAM182B	0.03916	-2.22016
1566865_at	FAM200A	0.0297657	-3.03472
214946_x_at	FAM21A /// FAM21B /// FAM21C /// FAM21D	0.0443784	1.41597
217916_s_at	FAM49B	0.0126486	1.9478
227002_at	FAM78A	0.0127009	-1.58321
236029_at	FAT3	0.036952	-3.97154
209004_s_at	FBXL5	0.0372687	1.69173
209005_at	FBXL5	0.0455299	1.88127
211816_x_at	FCAR	0.021566	3.65979
204232_at	FCER1G	0.0407435	1.38503
1553196_a_at	FCRL3	0.0413715	-2.60398
224403_at	FCRL4	0.0193661	-3.25188
215000_s_at	FEZ2	0.0477109	1.55152
227948_at	FGD4	0.0373815	2.1406
239178_at	FGF9	0.0272959	-3.90863
219718_at	FGGY	0.03075	1.77908
200709_at	FKBP1A	0.0375981	1.5067
215187_at	FLJ11292	0.00202766	-2.89192
220828_s_at	FLJ11292	0.0085483	-2.41297
1557895_at	FLJ35934	0.00458943	-5.24335
229521_at	FLJ36031	0.0307346	2.62711
1558579_at	FLJ37786	0.0254891	-3.44837
231882_at	FLJ39632	0.0118025	-5.43223
234106_s_at	FLYWCH1	0.0305499	-1.8789
222692_s_at	FNDC3B	0.0352826	2.20416
217487_x_at	FOLH1	0.0127009	-2.78148
218880_at	FOSL2	0.0350858	2.1462
214211_at	FTH1	0.0163377	1.87111
211628_x_at	FTH1P5	0.0173066	1.6929
223120_at	FUCA2	0.0232953	1.81334
218084_x_at	FXYD5	0.0403392	1.49042
224252_s_at	FXYD5	0.044766	1.5244
208283_at	GAGE1	0.0070222	-5.46911
1568618_a_at	GALNT1	0.019418	1.56562
223991_s_at	GALNT2	0.0173066	1.79816
214869_x_at	GAPVD1	0.0445036	1.67097
209093_s_at	GBA /// GBAP1	0.0477109	1.69281
219473_at	GDAP2	0.0386479	1.57872
214005_at	GGCX	0.0118025	2.00782
207131_x_at	GGT1	0.0455206	1.74178
1554510_s_at	GHITM	0.0151237	1.53471
1552315_at	GIMAP1	0.0278975	-1.74405
204982_at	GIT2	0.0404535	1.74841
217167_x_at	GK	0.0473844	2.06014
215977_x_at	GK	0.0308019	2.23847
215966_x_at	GK3P	0.0297657	2.17721
209276_s_at	GLRX	0.0461547	1.88354
226177_at	GLTP	0.00927026	1.7445
1562089_at	GLYATL1	0.0298681	-3.0032
223488_s_at	GNB4	0.0183439	2.12962
217819_at	GOLGA7	0.0355278	1.4699
208797_s_at	GOLGA8A	0.0386479	-1.86889
201057_s_at	GOLGB1	0.0381389	1.66209
210007_s_at	GPD2	0.03916	1.60403
225447_at	GPD2	0.0307346	1.71648
227769_at	GPR27	0.0473844	2.23691
220404_at	GPR97	0.0492712	2.65629
206730_at	GRIA3	0.037218	-2.78738
210981_s_at	GRK6	0.0174938	1.78936
211543_s_at	GRK6	0.0226039	2.00738
202848_s_at	GRK6	0.019418	2.57491
201554_x_at	GYG1	0.0226039	2.0029
211275_s_at	GYG1	0.00676567	2.01838
231004_s_at	H1FX	0.0085483	-1.89334
204805_s_at	H1FX	0.0412029	-1.68645
200853_at	H2AFZ	0.0114253	1.55977
213911_s_at	H2AFZ	0.0245453	1.57934
206643_at	HAL	0.0492712	1.86646
241498_at	HARBI1	0.0499647	1.55166
202299_s_at	HBXIP	0.0357656	1.57216
202300_at	HBXIP	0.0108136	1.84275
203745_at	HCCS	0.0296398	1.80629
232975_at	HCG18	0.0104594	-2.29407
228813_at	HDAC4	0.0332285	1.61309
203974_at	HDHD1	0.0432702	1.57375
203430_at	HEBP2	0.0152191	2.04359
232080_at	HECW2	0.035298	2.55841
212966_at	HIC2	0.0227313	-2.23221
224415_s_at	HINT2	0.0119019	2.04711
226297_at	HIPK3	0.0339493	1.46892
207764_s_at	HIPK3	0.0373717	2.08692
207982_at	HIST1H1T	0.043906	2.14707
214472_at	HIST1H2AD /// HIST1H3D	0.0266299	2.96914
218726_at	HJURP	0.0375981	2.21029
214938_x_at	HMGB1	0.0227313	1.52715
211933_s_at	HNRNPA3 /// HNRNPA3P1	0.0148013	1.39619
227744_s_at	HNRNPD	0.0127009	-2.70717
202072_at	HNRNPL	0.0173464	2.67198
209513_s_at	HSDL2	0.0461547	1.77522
209448_at	HTATIP2	0.0357407	1.82647
220249_at	HYAL4	0.0360063	2.04235
201193_at	IDH1	0.0273553	1.70876
212221_x_at	IDS	0.0227313	1.4508
223626_x_at	IFI27L2	0.00506622	1.94106
225669_at	IFNAR1	0.0496432	1.66668
204191_at	IFNAR1	0.0312205	2.12572
204785_x_at	IFNAR2	0.0494438	1.55454
210904_s_at	IL13RA1	0.0375584	1.95542
207072_at	IL18RAP	0.0404535	2.3994
202948_at	IL1R1	0.0455898	2.53315
205403_at	IL1R2	0.0385358	2.3351
201234_at	ILK	0.044766	1.50026
229582_at	INO80C	0.0475287	1.46514
220034_at	IRAK3	0.0108136	2.46779
1568830_at	IRAK3	0.0227313	3.32654
209075_s_at	ISCU	0.0283404	1.50504
239101_at	ITCH	0.0296398	2.48997
221449_s_at	ITFG1	0.0246506	1.64016
205786_s_at	ITGAM	0.0131484	1.84666
201188_s_at	ITPR3	0.0217504	-1.55484
223104_at	JAGN1	0.0222443	1.68785
201648_at	JAK1	0.0127009	1.4514
212723_at	JMJD6	0.0493288	1.56952
210927_x_at	JTB	0.0409555	1.50146
200048_s_at	JTB	0.0431898	1.52092
210434_x_at	JTB	0.0108136	1.7427
203752_s_at	JUND	0.0436843	1.50593
206765_at	KCNJ2	0.043906	1.83118
212188_at	KCTD12	0.019418	1.86264
229837_s_at	KCTD5	0.0361812	-1.56853
213003_s_at	KIAA0146	0.0455299	2.10743
212735_at	KIAA0226	0.0455898	1.66719
201777_s_at	KIAA0494	0.03916	1.53612
1554438_at	KIAA1217	0.0333605	-2.0922
233893_s_at	KIAA1530	0.010593	1.80835
215750_at	KIAA1659	0.017453	-3.71911
225718_at	KIAA1715	0.0492712	2.71186
230166_at	KIAA1958	0.0416872	2.23413
225878_at	KIF1B	0.0377659	2.1723
218755_at	KIF20A	0.0163377	3.02434
218355_at	KIF4A	0.0401054	3.49397
224606_at	KLF6	0.0228638	1.44945
213741_s_at	KPNA1	0.0403043	1.50972
202055_at	KPNA1	0.0176182	1.54774
202056_at	KPNA1	0.043906	1.6337
201088_at	KPNA2	0.0354649	1.73922
213567_at	KPNA4	0.0217504	1.74612
224885_s_at	KRTCAP2	0.0328343	1.58324
203041_s_at	LAMP2	0.0275313	1.82264
203042_at	LAMP2	0.0307346	1.84499
227013_at	LATS2	0.0246506	1.80124
238071_at	LCN10 /// LCN6	0.0443784	-2.12498
244598_at	LCP2	0.0342676	1.76038
213371_at	LDB3	0.0361362	-3.01627
200650_s_at	LDHA	0.0484895	1.33344
207409_at	LECT2	0.0108796	-5.66596
212658_at	LHFPL2	0.0152481	2.25323
210784_x_at	LILRA6 /// LILRB3	0.043906	1.77485
211336_x_at	LILRB1	0.0492712	1.64504
210225_x_at	LILRB3	0.0473844	1.75806
202193_at	LIMK2	0.0405516	2.07477
206440_at	LIN7A	0.0297657	2.38684
201847_at	LIPA	0.031735	1.55325
1557961_s_at	LOC100127983	0.0296498	2.94866
228107_at	LOC100127983	0.03916	3.00162
221979_at	LOC100129250	0.0251206	2.54608
78383_at	LOC100129250	0.017453	3.03441
224110_at	LOC100133319	0.0473844	-2.70595
231231_at	LOC100286993	0.0238104	-3.59269
236898_at	LOC100288781	0.0307346	3.61631
214809_at	LOC100294145	0.031735	-2.09313
241943_at	LOC100505833	0.0328602	-2.30417
239138_at	LOC100506638	0.0488482	1.82562
241353_s_at	LOC100507507	0.0275313	1.87583
242012_at	LOC100508147	0.037218	-1.71807
210386_s_at	LOC100510712 /// MTX1	0.0119019	2.09979
242663_at	LOC148189	0.0384303	-3.71416
1562527_at	LOC283027	0.0118025	-4.1921
1558982_at	LOC375010	0.0257977	-2.78436
1560119_at	LOC389634	0.02878	-2.09106
1555707_at	LOC445341	0.0292324	-3.07964
1554949_at	LOC554174	0.0278975	-1.80974
238449_at	LOC595101	0.0473844	-2.21431
1557094_at	LOC728449	0.00238592	-5.58331
1558128_at	LOC730202	0.0412029	-1.81367
234861_at	LOC93463	0.0455963	-2.21311
206960_at	LPAR4	0.0278975	-5.77121
202822_at	LPP	0.0224196	1.88025
235347_at	LRCH3	0.0477109	-1.67724
228648_at	LRG1	0.0364592	2.47098
1562939_at	LRRC16A	0.0419606	-2.84447
1569124_at	LRRC63	0.0463548	1.53089
225593_at	LSM10	0.0324698	1.60794
212532_s_at	LSM12	0.0461547	1.44811
1557066_at	LUC7L	0.0473844	-1.73856
223295_s_at	LUC7L	0.0479295	-1.60431
203897_at	LYRM1	0.0434936	1.52456
226919_at	LYRM2	0.0491285	-2.24061
232283_at	LYSMD1	0.0384236	1.77049
214242_at	MAN1A2	0.0473844	-1.78999
224689_at	MANBAL	0.0286478	1.59325
205698_s_at	MAP2K6	0.027628	2.08992
225927_at	MAP3K1	0.00391777	1.65579
242581_at	MAP3K15	0.035298	-2.41513
206571_s_at	MAP4K4	0.0100312	2.12787
212271_at	MAPK1	0.00458943	2.05514
210059_s_at	MAPK13	0.0348078	1.85612
210449_x_at	MAPK14	0.0172396	2.34554
211561_x_at	MAPK14	0.0104594	2.56311
202568_s_at	MARK3	0.0413715	1.6568
227833_s_at	MBD6	0.0316567	1.54452
213288_at	MBOAT2	0.0108136	2.80954
1554730_at	MCTP1	0.0251206	2.88342
229021_at	MCTP2	0.0386991	1.7883
229005_at	MCTP2	0.0324912	2.08322
218163_at	MCTS1	0.0173066	1.84872
209397_at	ME2	0.0456836	1.54369
210153_s_at	ME2	0.0375048	1.70033
235077_at	MEG3	0.043925	-2.16996
222447_at	METTL9	0.0222443	1.7835
226220_at	METTL9	0.0419974	1.8374
204152_s_at	MFNG	0.0377659	-1.66814
223974_at	MGC11082	0.035386	2.45623
201403_s_at	MGST3	0.0461547	1.58001
224726_at	MIB1	0.0148772	1.72535
229675_at	MINA	0.0475287	-1.68763
224917_at	MIR21	0.0332172	2.04055
209467_s_at	MKNK1	0.0301369	1.89186
230122_at	MLLT10	0.0171535	1.99903
217910_x_at	MLX	0.0353243	1.45249
203435_s_at	MME	0.0412029	2.03382
203936_s_at	MMP9	0.0235649	3.96255
221381_s_at	MORF4 /// MORF4L1	0.0441905	1.51041
217982_s_at	MORF4L1	0.044994	1.31232
201994_at	MORF4L2	0.0455898	1.57491
218865_at	MOSC1	0.01551	3.46548
215692_s_at	MPPED2	0.0227313	-3.33311
227747_at	MPZL3	0.0251206	1.74396
223743_s_at	MRPL4	0.0416577	-1.67403
223280_x_at	MS4A6A	0.0360025	1.66773
224356_x_at	MS4A6A	0.0297657	1.72403
224765_at	MSL1	0.0322877	1.49096
207551_s_at	MSL3	0.0314914	1.88609
205323_s_at	MTF1	0.0477109	1.65181
225206_s_at	MTRF1L	0.0436194	1.78596
221253_s_at	MUTED /// TXNDC5	0.0339493	2.25888
209124_at	MYD88	0.0419974	1.52559
1568926_x_at	MYLK3	0.00458943	-3.56003
45526_g_at	NAT15	0.0475287	1.67944
209062_x_at	NCOA3	0.0364592	2.02866
1560207_at	NCRNA00255	0.0360406	-2.78283
226835_s_at	NCRNA00275	0.039791	1.77298
226227_x_at	NCRNA00275	0.0475287	1.77612
214279_s_at	NDRG2	0.0444816	-2.06288
230501_at	NDUFA10	0.0456284	-2.19398
208969_at	NDUFA9	0.0416587	1.52488
218320_s_at	NDUFB11	0.0296398	1.57926
203371_s_at	NDUFB3	0.0477109	2.28953
203606_at	NDUFS6	0.0127009	1.74769
213673_x_at	NENF	0.0490285	1.82572
203574_at	NFIL3	0.0365088	2.0092
209239_at	NFKB1	0.0377659	1.59784
224304_x_at	NIN	0.0332172	1.56034
212129_at	NIPA2	0.0375981	1.5038
1562792_at	NIPAL1	0.0413715	1.78462
221104_s_at	NIPSNAP3B	0.0357541	2.07991
223944_at	NLRP12	0.0141789	2.16248
1554952_s_at	NLRP12	0.036952	2.24119
217962_at	NOP10	0.00978934	1.62376
210756_s_at	NOTCH2	0.0277041	2.76257
240440_at	NPL	0.0146531	2.02112
243066_at	NPL	0.0413715	2.18587
209506_s_at	NR2F1	0.0247475	-2.04291
211671_s_at	NR3C1	0.017453	1.77756
208709_s_at	NRD1	0.0375981	1.67009
232149_s_at	NSMAF	0.0339493	1.74209
238515_at	NUDT16	0.0195649	2.37774
212181_s_at	NUDT4 /// NUDT4P1	0.0443784	1.55999
224939_at	NUFIP2	0.0245453	1.67469
224958_at	NUFIP2	0.017453	2.00249
214250_at	NUMA1	0.0278975	-2.03055
214251_s_at	NUMA1	0.0286478	-1.84314
212315_s_at	NUP210	0.0345236	-1.5454
213947_s_at	NUP210	0.0312205	-1.47872
202155_s_at	NUP214	0.0036053	2.13196
232960_at	NUP62CL	0.0303338	-2.46143
210793_s_at	NUP98	0.0387529	2.03364
202397_at	NUTF2	0.0340525	1.80093
222945_x_at	OLAH	0.04955	4.17704
219975_x_at	OLAH	0.0432099	6.41545
234521_at	OR51I2	0.0204494	1.68163
205085_at	ORC1	0.0477214	1.54648
200714_x_at	OS9	0.0296398	1.4471
224637_at	OST4	0.031735	1.64224
206048_at	OVOL2	0.0104594	-5.22455
214794_at	PA2G4	0.0427245	1.72808
208676_s_at	PA2G4	0.0119019	1.82477
215823_x_at	PABPC1 /// RLIM	0.0332285	1.46516
200815_s_at	PAFAH1B1	0.00506622	1.99611
224777_s_at	PAFAH1B2	0.031735	1.63279
214607_at	PAK3	0.0266299	-2.84283
218809_at	PANK2	0.0451055	1.40893
212718_at	PAPOLA	0.0173464	1.51177
212720_at	PAPOLA	0.016161	2.23787
224940_s_at	PAPPA	0.0148013	-5.15321
218271_s_at	PARL	0.0278051	1.48937
219148_at	PBK	0.0435529	2.87777
204031_s_at	PCBP2	0.0456292	1.47275
228959_at	PDK3	0.0246506	1.80469
221957_at	PDK3	0.0242161	2.1583
220865_s_at	PDSS1	0.0473844	1.8688
238957_at	PDXDC2	0.0173066	-2.72632
232213_at	PELI1	0.043906	1.96198
201507_at	PFDN1	0.0322877	1.55819
202464_s_at	PFKFB3	0.0277041	1.77424
228499_at	PFKFB4	0.0381389	2.16659
200886_s_at	PGAM1	0.0260202	1.47858
208454_s_at	PGCP	0.0339493	1.97486
203501_at	PGCP	0.018997	2.10302
201968_s_at	PGM1	0.0312217	1.67485
222622_at	PGP	0.031735	1.87143
203278_s_at	PHF21A	0.0333605	1.52599
1554153_a_at	PHF21A	0.031735	1.80256
1559479_at	PI4K2B	0.0477109	-1.96891
204297_at	PIK3C3	0.0461547	1.5091
227645_at	PIK3R5	0.0238104	1.63999
227553_at	PIK3R5	0.010855	1.79543
214866_at	PLAUR	0.0435529	1.90481
216551_x_at	PLCG1	0.0209783	-1.76326
202122_s_at	PLIN3	0.0477109	1.71118
227276_at	PLXDC2	0.0187425	2.26614
213241_at	PLXNC1	0.0473844	1.70566
202337_at	PMF1	0.0343814	1.99198
225844_at	POLE4	0.0297657	1.99487
222253_s_at	POM121L9P	0.000541709	-12.9361
242912_at	POTEM	0.0193661	-2.632
214375_at	PPFIBP1	0.00408682	-4.70022
226074_at	PPM1M	0.0459932	1.61479
216347_s_at	PPP1R13B	0.044899	-1.46487
222662_at	PPP1R3B	0.0477214	1.78271
202313_at	PPP2R2A	0.0273553	1.62296
202187_s_at	PPP2R5A	0.0266299	1.7144
203529_at	PPP6C	0.0152481	1.50293
206174_s_at	PPP6C	0.00551857	2.26021
202792_s_at	PPP6R2	0.0307346	-1.42922
201494_at	PRCP	0.0119019	1.71599
224232_s_at	PRELID1	0.0465868	1.53744
223032_x_at	PRELID1	0.017187	1.75052
218233_s_at	PRICKLE4 /// TOMM6	0.0387171	1.53183
225000_at	PRKAR2A	0.0416721	1.41876
1564521_x_at	PRMT5	0.0270472	1.71008
202407_s_at	PRPF31	0.0148013	-1.91184
217794_at	PRR13	0.0297657	1.51053
238513_at	PRRG4	0.0209622	2.8621
229073_at	PRTG	0.0070222	-4.48725
203460_s_at	PSEN1	0.017453	1.62459
208799_at	PSMB5	0.0455179	1.8048
201198_s_at	PSMD1	0.0128177	1.85793
200830_at	PSMD2	0.00973992	1.59555
212015_x_at	PTBP1	0.0174938	-1.5296
225363_at	PTEN	0.0455963	1.54116
229535_at	PTPMT1	0.0492712	1.51351
203554_x_at	PTTG1	0.0173066	1.96078
200677_at	PTTG1IP	0.0421757	1.46244
231715_s_at	PYCR2	0.0141789	-1.99364
205174_s_at	QPCT	0.0479295	2.01671
201482_at	QSOX1	0.0173066	2.05194
200863_s_at	RAB11A	0.00732938	1.76875
225177_at	RAB11FIP1	0.0446111	1.52469
209515_s_at	RAB27A	0.0445878	1.60798
217764_s_at	RAB31	0.0480405	1.47931
224710_at	RAB34	0.0246506	1.8467
244124_at	RAB37	0.0134596	-2.07535
211961_s_at	RAB7A	0.0165179	1.57418
208640_at	RAC1	0.020877	1.3521
228548_at	RAP1A	0.0297657	1.90003
206221_at	RASA3	0.00458943	-2.64604
1553186_x_at	RASEF	0.00752296	-2.73405
1553185_at	RASEF	0.0108136	-2.64953
57540_at	RBKS	0.0461547	1.46662
218134_s_at	RBM22	0.0332172	1.53633
235045_at	RBM7	0.0387574	1.86186
225269_s_at	RBMS1	0.0152481	1.45931
218117_at	RBX1	0.0388042	1.79897
220202_s_at	RC3H2	0.0352826	1.53333
1561720_at	RECQL5	0.0351142	-3.97936
208872_s_at	REEP5	0.0101013	1.88108
234950_s_at	RFWD2	0.0377659	1.64776
209110_s_at	RGL2	0.0227313	1.78573
1555022_at	RGS12	0.00506622	-4.75277
209441_at	RHOBTB2	0.010593	-2.36538
203175_at	RHOG	0.0377659	1.694
212478_at	RMND5A	0.0404875	1.98091
213566_at	RNASE6	0.0232953	1.9723
221287_at	RNASEL	0.0401054	1.84437
201779_s_at	RNF13	0.0173464	2.18044
219104_at	RNF141	0.0174938	2.40697
227726_at	RNF166	0.0428854	-1.77724
236465_at	RNF175	0.0409585	1.94873
204668_at	RNF24	0.031789	2.17083
207223_s_at	ROD1	0.0479949	1.71775
234243_at	RPF1	0.0338949	-2.75083
213491_x_at	RPN2	0.023153	1.54413
225148_at	RPS19BP1	0.0292324	1.59462
217753_s_at	RPS26	0.0301792	2.13341
208904_s_at	RPS28	0.0384303	1.52394
201628_s_at	RRAGA	0.0146531	1.57645
209567_at	RRS1	0.0375584	-1.63549
219549_s_at	RTN3	0.0070222	1.7619
205863_at	S100A12	0.0413715	2.05366
201543_s_at	SAR1A	0.0206041	1.56241
205475_at	SCRG1	0.0492307	2.3598
224960_at	SCYL2	0.0435529	1.67861
203090_at	SDF2	0.017453	1.69579
221972_s_at	SDF4	0.0403043	-1.731
201290_at	SEC11A	0.0416577	1.37721
214257_s_at	SEC22B	0.0466218	1.46637
215641_at	SEC24D	0.0498239	2.60609
230215_at	SEC61A2	0.0491285	1.62605
203133_at	SEC61B	0.0400781	1.39771
225352_at	SEC62	0.0352826	2.49776
214243_s_at	SERHL /// SERHL2	0.0170772	-1.84825
217272_s_at	SERPINB13	0.0396434	-2.02574
206034_at	SERPINB8	0.0426674	1.87921
225850_at	SFT2D1	0.049863	1.42043
214838_at	SFT2D2	0.034404	1.60021
201810_s_at	SH3BP5	0.030328	1.65335
211565_at	SH3GL3	0.00202766	-7.21579
210101_x_at	SH3GLB1	0.0296119	1.76869
209091_s_at	SH3GLB1	0.017453	1.78163
209090_s_at	SH3GLB1	0.00757718	1.98876
224846_at	SHKBP1	0.0101013	2.10993
207570_at	SHOX	0.0104594	-4.00527
204157_s_at	SIK3	0.0273553	2.06151
202254_at	SIPA1L1	0.0432099	1.93144
233587_s_at	SIPA1L2	0.0309132	2.48874
232891_at	SIRPD	0.0491285	1.79006
206634_at	SIX3	0.0373815	-2.29722
217640_x_at	SKA1	0.0127009	2.19239
200711_s_at	SKP1	0.0403043	1.37853
200719_at	SKP1	0.0135716	1.77229
203761_at	SLA	0.0227313	1.59943
226741_at	SLC12A6	0.0174938	1.5757
200030_s_at	SLC25A3	0.0375699	1.3679
226179_at	SLC25A37	0.0359397	1.60151
237340_at	SLC26A8	0.0356333	3.66956
222088_s_at	SLC2A14 /// SLC2A3	0.0275737	2.14039
202499_s_at	SLC2A3	0.0104594	2.00755
202497_x_at	SLC2A3	0.037218	2.13534
219215_s_at	SLC39A4	0.0225014	2.17858
224595_at	SLC44A1	0.0387574	1.89169
219229_at	SLCO3A1	0.0108796	1.84519
203076_s_at	SMAD2	0.0413715	1.39977
215714_s_at	SMARCA4	0.0108136	-1.56896
209518_at	SMARCD1	0.0418433	1.45197
204099_at	SMARCD3	0.01551	2.12693
220140_s_at	SNX11	0.0286478	1.72042
53912_at	SNX11	0.0375699	1.83379
205482_x_at	SNX15	0.0352826	1.40595
221006_s_at	SNX27	0.0227313	2.22343
210648_x_at	SNX3	0.0309132	1.67079
217789_at	SNX6	0.0494966	1.43471
228479_at	SOAT1	0.02248	1.55665
230707_at	SORL1	0.0443784	1.90282
212807_s_at	SORT1	0.0173464	2.13581
202935_s_at	SOX9	0.0359278	-3.53682
224760_at	SP1	0.0333605	2.0213
222753_s_at	SPCS3	0.047002	1.86279
217827_s_at	SPG21	0.0228638	1.81653
232739_at	SPIB	0.0204969	-2.61632
225095_at	SPTLC2	0.0193661	1.79405
203127_s_at	SPTLC2	0.0204969	2.12175
220456_at	SPTLC3	0.0286478	-2.5563
217995_at	SQRDL	0.0386991	1.72852
232547_at	SRCIN1	0.00162598	-7.46815
202199_s_at	SRPK1	0.0119808	2.6748
208610_s_at	SRRM2	0.0494966	-1.88177
201004_at	SSR4	0.0140695	1.55788
235334_at	ST6GALNAC3	0.0280124	2.43133
215044_s_at	STAM2	0.0312205	1.78933
205026_at	STAT5B	0.0455179	1.80617
213037_x_at	STAU1	0.0324698	1.41845
207320_x_at	STAU1	0.021566	1.52421
225987_at	STEAP4	0.0480405	1.70421
205214_at	STK17B	0.0173464	2.40161
208855_s_at	STK24	0.0432099	1.32668
225649_s_at	STK35	0.0405516	1.3583
225364_at	STK4	0.0163377	1.54398
205411_at	STK4	0.0489973	1.65665
201060_x_at	STOM	0.0118502	1.81254
221554_at	STRADA	0.0342676	1.48742
52169_at	STRADA	0.0278975	1.67817
221499_s_at	STX16	0.0108136	2.30367
217874_at	SUCLG1	0.0492307	1.40501
201483_s_at	SUPT4H1	0.0476687	1.46559
202565_s_at	SVIL	0.0456292	1.57081
206740_x_at	SYCP1	0.0104102	-2.57003
202339_at	SYMPK	0.0485113	-1.35632
200055_at	TAF10	0.0148013	1.70003
235154_at	TAF3	0.0455078	-1.7039
1553556_at	TAS2R40	0.0492712	1.696
240715_at	TBX5	0.0173464	-4.07219
204158_s_at	TCIRG1	0.0085483	2.15117
202384_s_at	TCOF1	0.0352826	-1.49731
208778_s_at	TCP1	0.0108136	1.5048
225840_at	TEF	0.0479295	-1.64849
242939_at	TFDP1	0.0352826	2.13089
204147_s_at	TFDP1	0.0328602	2.61753
212330_at	TFDP1	0.0227313	2.83549
212457_at	TFE3	0.0352826	1.60383
206649_s_at	TFE3	0.0375048	1.72949
212043_at	TGOLN2	0.021713	1.48707
222835_at	THSD4	0.0227313	-3.99578
216459_x_at	TIGD1L	0.0421757	-2.13193
225535_s_at	TIMM23	0.0286478	1.64945
203093_s_at	TIMM44	0.0232953	-1.62731
210800_at	TIMM8A	0.00148187	-8.9615
203167_at	TIMP2	0.00505538	2.86268
204924_at	TLR2	0.044803	1.77557
210166_at	TLR5	0.0222443	2.57478
229560_at	TLR8	0.0297703	1.7751
209149_s_at	TM9SF1	0.0432099	1.84158
201078_at	TM9SF2	0.00936962	1.81272
222845_x_at	TMBIM4	0.0352527	1.4421
223892_s_at	TMBIM4	0.0246939	1.56016
200803_s_at	TMBIM6	0.0266299	1.69738
214958_s_at	TMC6	0.0246506	-1.71103
224680_at	TMED4	0.0248448	1.31632
212165_at	TMEM183A /// TMEM183B	0.0217504	1.84738
201002_s_at	TMEM189-UBE2V1 /// UBE2V1	0.0462351	1.55314
225492_at	TMEM33	0.036952	1.77876
235907_at	TMEM33	0.0195649	2.08574
217766_s_at	TMEM50A	0.0381389	1.35988
222401_s_at	TMEM50A	0.0308019	1.55828
200620_at	TMEM59	0.042604	1.45647
222507_s_at	TMEM9B	0.0278975	1.74313
211841_s_at	TNFRSF25	0.0377659	-2.3282
210847_x_at	TNFRSF25	0.044766	-2.20304
219423_x_at	TNFRSF25	0.0381389	-2.12728
203839_s_at	TNK2	0.0395309	1.9873
225766_s_at	TNPO1	0.0408908	1.61105
212409_s_at	TOR1AIP1	0.0246506	1.74404
209593_s_at	TOR1B	0.0440013	1.68384
214601_at	TPH1	0.044803	-3.44847
200743_s_at	TPP1	0.0455898	1.49993
213443_at	TRADD	0.0146531	-1.76233
223031_s_at	TRAF7	0.0140695	-2.02944
201399_s_at	TRAM1	0.00202766	2.03516
224806_at	TRIM25	0.0483742	1.83867
210266_s_at	TRIM33	0.0461547	1.39264
212435_at	TRIM33	0.0435529	1.66861
1568592_at	TRIM69	0.0377659	1.64513
201546_at	TRIP12	0.0266299	1.51525
216454_at	TRMT1	0.0426271	-1.61163
221952_x_at	TRMT5	0.0339493	1.34628
201758_at	TSG101	0.0139697	1.66391
238973_s_at	TSNAX	0.0407435	2.31957
221002_s_at	TSPAN14	0.0426301	2.00115
201434_at	TTC1	0.00458943	1.70254
215849_x_at	TTC18	0.0070222	-5.60967
212242_at	TUBA4A	0.0461547	1.64864
218965_s_at	TUT1	0.03916	-1.37132
216609_at	TXN	0.0144706	2.33287
208864_s_at	TXN	0.0106504	2.54337
201588_at	TXNL1	0.0386991	1.42039
222748_s_at	TXNL4B	0.0428854	1.88079
201899_s_at	UBE2A	0.0297657	1.55213
211763_s_at	UBE2B	0.01551	2.15108
202954_at	UBE2C	0.0166331	2.04444
201345_s_at	UBE2D2	0.0413715	1.35704
225783_at	UBE2F	0.0322877	1.82033
1557053_s_at	UBE2G2	0.0325073	-1.62968
1558088_a_at	UBE2I	0.0256386	-2.49679
222435_s_at	UBE2J1	0.0461059	1.88996
218011_at	UBL5	0.0332172	1.91929
222989_s_at	UBQLN1	0.0376897	1.78775
212008_at	UBXN4	0.0339493	1.80066
204881_s_at	UGCG	0.0325073	1.79323
221765_at	UGCG	0.0441664	1.82217
226899_at	UNC5B	0.00408682	-4.74218
222470_s_at	UQCC	0.0297657	-1.61095
212600_s_at	UQCRC2	0.0352826	1.45005
201568_at	UQCRQ	0.048225	2.38692
226652_at	USP3	0.021906	1.56872
221654_s_at	USP3	0.00936962	1.74293
224979_s_at	USP36	0.0492712	-1.52554
226730_s_at	USP37	0.0364592	1.83936
232621_at	USP48	0.0280124	-2.66392
208780_x_at	VAPA	0.0225014	1.58358
221731_x_at	VCAN	0.0435529	1.66792
204620_s_at	VCAN	0.028587	1.79075
204619_s_at	VCAN	0.0148772	2.46217
1556228_a_at	VCPIP1	0.0275313	2.06538
211662_s_at	VDAC2	0.0461547	1.39773
208845_at	VDAC3	0.0104594	1.49674
1555938_x_at	VIM	0.03075	2.53844
236254_at	VPS13B	0.0307346	1.72806
217837_s_at	VPS24	0.0291107	1.5857
217727_x_at	VPS35	0.0238104	1.4493
239552_at	VWDE	0.0477642	-4.61907
38964_r_at	WAS	0.0312205	1.62722
212602_at	WDFY3	0.0286478	2.58279
200609_s_at	WDR1	0.0127009	1.57033
224897_at	WDR26	0.0328602	1.77148
222763_s_at	WDR33	0.037218	1.53668
201296_s_at	WSB1	0.0381389	1.66831
210561_s_at	WSB1	0.0247475	1.80922
201294_s_at	WSB1	0.0297657	2.88836
222581_at	XPR1	0.0381389	1.57065
207598_x_at	XRCC2	0.0498239	-2.56154
208643_s_at	XRCC5	0.0382454	1.33735
214733_s_at	YIPF1	0.0246506	1.75413
217717_s_at	YWHAB	0.0432099	1.49168
200640_at	YWHAZ	0.0353133	1.39256
224711_at	YY1	0.0432099	1.44242
225665_at	ZAK	0.0354669	2.38483
216844_at	ZC3H7B	0.0105098	-3.77106
225634_at	ZC3HAV1	0.0297657	1.68123
238800_s_at	ZCCHC6	0.039762	1.81057
236155_at	ZCCHC6	0.031735	2.01675
220618_s_at	ZCWPW1	0.0442229	-1.66253
233751_at	ZFHX3	0.0237661	-2.20049
208033_s_at	ZFHX3	0.0339493	-1.60664
201367_s_at	ZFP36L2	0.0245453	-2.11677
224636_at	ZFP91	0.0246506	1.31758
1570135_at	ZNF230	0.0193661	2.88031
218401_s_at	ZNF281	0.0307346	1.98375
222619_at	ZNF281	0.0118025	2.57785
1569250_at	ZNF333	0.0386479	2.27326
202010_s_at	ZNF410	0.0361948	1.42386
215429_s_at	ZNF428	0.047002	-1.71116
232137_at	ZNF616	0.035298	-2.3631
219047_s_at	ZNF668	0.0303728	1.72131
213542_at	ZNF710	0.0388808	-1.76358
1569637_at	ZNF736	0.0269482	-2.38419
228009_x_at	ZNRD1	0.031735	1.90464
234457_at	ZNRD1-AS	0.0354669	-3.07767
225138_at	ZRANB1	0.0479295	1.63248
3h_Male
		FDR p-value	Fold-Change
Probe Set ID	Gene Symbol_1	CE-Stroke * M vs. VRF-Control * M	CE-Stroke * M vs. VRF-Control * M
244723_at	ACSM2A	0.00267795	-11.1693
202053_s_at	ALDH3A2	0.0344886	1.86711
209934_s_at	ATP2C1	0.0261641	1.68097
209935_at	ATP2C1	0.0343667	1.96491
202961_s_at	ATP5J2	0.0375789	1.60518
208860_s_at	ATRX	0.0428087	2.17288
223846_at	AZI2	0.044302	1.9838
1553959_a_at	B3GALT6	0.0485955	2.68391
201882_x_at	B4GALT1	0.0215837	2.1251
213473_at	BRAP	0.0297659	1.87077
1557548_at	C10orf108	0.047975	-3.58399
1555364_at	C11orf58	0.0319836	-4.01696
1555365_x_at	C11orf58	0.0125691	-4.10209
53071_s_at	C17orf101	0.0165544	1.77429
225404_at	C1orf212	0.0344886	1.82357
202217_at	C21orf33	0.0364924	1.48565
223157_at	C4orf14	0.0242355	1.79428
226159_at	C5orf51	0.0297659	1.75957
238034_at	CANX	0.0147668	1.89431
205988_at	CD84	0.0297659	2.43109
235533_at	COX19	0.0424642	1.97563
218198_at	DHX32	0.0424642	2.07356
202441_at	ERLIN1	0.0386507	1.85133
239481_at	FAM133A	0.0386507	-3.37814
227002_at	FAM78A	0.0146739	-1.72699
215187_at	FLJ11292	0.0163275	-2.39665
205384_at	FXYD1	0.0157612	2.51183
225007_at	G3BP1	0.0366027	2.07619
229114_at	GAB1	0.0370813	2.27593
204374_s_at	GALK1	0.0386507	-1.72501
214005_at	GGCX	0.0242355	2.09232
1552315_at	GIMAP1	0.0386239	-1.84004
223488_s_at	GNB4	0.0448728	2.0922
223252_at	HDGFRP2	0.0147668	-1.6241
224415_s_at	HINT2	0.0311983	2.01243
227744_s_at	HNRNPD	0.0377455	-2.54828
213567_at	KPNA4	0.0297659	1.82428
1557961_s_at	LOC100127983	0.0191732	4.10767
227122_at	LOC100507237	0.044302	1.46668
210386_s_at	LOC100510712 /// MTX1	0.0386239	1.97989
1557717_at	LOC338862	0.0424642	-2.40506
1557094_at	LOC728449	0.0297659	-3.67095
234861_at	LOC93463	0.0387104	-2.78142
232283_at	LYSMD1	0.0364924	2.03269
224689_at	MANBAL	0.0304217	1.72872
222867_s_at	MED31	0.044302	1.54923
223354_x_at	MFF	0.0344886	1.99546
211061_s_at	MGAT2	0.0297659	1.72076
224726_at	MIB1	0.0157612	1.88977
230122_at	MLLT10	0.0256489	2.12796
201994_at	MORF4L2	0.0496454	1.74308
224332_s_at	MRPL43	0.0364924	1.81366
221253_s_at	MUTED /// TXNDC5	0.044302	2.56111
208969_at	NDUFA9	0.0370813	1.69819
211671_s_at	NR3C1	0.0297659	1.8776
213947_s_at	NUP210	0.0424642	-1.54863
230068_s_at	PEG3-AS	0.0364924	-3.49649
227553_at	PIK3R5	0.0456107	1.66395
222253_s_at	POM121L9P	0.00267795	-9.7582
214375_at	PPFIBP1	0.0297659	-3.4765
201979_s_at	PPP5C	0.0428087	-1.67495
206174_s_at	PPP6C	0.0368347	1.88047
1564521_x_at	PRMT5	0.0331248	1.87746
201198_s_at	PSMD1	0.0424642	1.76062
231715_s_at	PYCR2	0.0215837	-2.16911
244124_at	RAB37	0.0424642	-1.97201
228548_at	RAP1A	0.0485955	1.97022
206221_at	RASA3	0.0304682	-2.20915
1553186_x_at	RASEF	0.0493051	-2.15938
205332_at	RCE1	0.0377455	-1.60985
209441_at	RHOBTB2	0.0292994	-2.2468
234243_at	RPF1	0.0318674	-3.57793
213491_x_at	RPN2	0.0377455	1.56601
211565_at	SH3GL3	0.0125691	-5.50461
207570_at	SHOX	0.0269367	-3.9867
215714_s_at	SMARCA4	0.0297659	-1.5528
232547_at	SRCIN1	0.0375789	-3.67468
215044_s_at	STAM2	0.0424642	1.93903
221499_s_at	STX16	0.0424642	2.09844
206740_x_at	SYCP1	0.0165544	-2.72548
202339_at	SYMPK	0.044302	-1.46265
242939_at	TFDP1	0.0344886	2.56131
210800_at	TIMM8A	0.0103706	-6.29833
201078_at	TM9SF2	0.0382124	1.65873
212202_s_at	TMEM87A	0.0424642	1.43374
223031_s_at	TRAF7	0.023333	-2.11129
201399_s_at	TRAM1	0.0297659	1.66758
212118_at	TRIM27	0.0387104	2.17449
201434_at	TTC1	0.0285813	1.55755
201899_s_at	UBE2A	0.0366027	1.67548
226899_at	UNC5B	0.0496454	-2.99908
226730_s_at	USP37	0.0297659	2.22142
208845_at	VDAC3	0.0364924	1.41525
1555938_x_at	VIM	0.0386497	2.93016
218470_at	YARS2	0.0342984	1.79205
224711_at	YY1	0.0375789	1.56802
3h_UniqueToFemale
		FDR p-value	Fold-Change
Probe Set ID	Gene Symbol_1	CE-Stroke * F vs. VRF-Control * F	CE-Stroke * F vs. VRF-Control * F
210852_s_at	AASS	0.0171535	-3.74392
216066_at	ABCA1	0.0371879	2.25751
218739_at	ABHD5	0.0342676	2.34532
221679_s_at	ABHD6	0.0477109	-1.94528
205364_at	ACOX2	0.0431364	2.27547
89977_at	ACSM5	0.00658797	-3.14779
200727_s_at	ACTR2	0.00973992	2.20586
1554390_s_at	ACTR2	0.0431898	1.93604
224424_x_at	ACTR3BP2	0.0266299	-2.89048
224425_x_at	ACTR3BP2	0.0352826	-2.74993
224426_s_at	ACTR3BP2	0.03916	-2.1091
205209_at	ACVR1B	0.017453	1.9541
202604_x_at	ADAM10	0.0432099	1.73354
209765_at	ADAM19	0.0492712	1.54509
226071_at	ADAMTSL4	0.0373815	2.16055
230800_at	ADCY4	0.0187506	2.18351
201346_at	ADIPOR2	0.02429	1.62006
217939_s_at	AFTPH	0.0278975	1.52447
218091_at	AGFG1	0.0312205	1.94272
220199_s_at	AIDA	0.0278975	2.26246
212543_at	AIM1	0.0242161	1.32901
218064_s_at	AKAP8L	0.044951	-1.93381
223145_s_at	AKIRIN2	0.0108136	1.9216
211617_at	ALDOAP2	0.0163377	-3.48095
204446_s_at	ALOX5	0.0339557	1.84601
207690_at	ALX3	0.0339493	-1.93582
52731_at	AMBRA1	0.049647	-1.35243
224810_s_at	ANKRD13A	0.0305499	1.57717
238439_at	ANKRD22	0.0227313	4.78827
239196_at	ANKRD22	0.0315624	4.91172
1561079_at	ANKRD28	0.00984158	-4.14614
201012_at	ANXA1	0.037218	2.00555
209860_s_at	ANXA7	0.00551857	1.79496
209870_s_at	APBA2	0.0463548	-1.95946
221036_s_at	APH1B	0.0158843	2.05019
208248_x_at	APLP2	0.0322877	1.56885
208704_x_at	APLP2	0.0174938	1.6786
202631_s_at	APPBP2	0.0404535	1.55512
39249_at	AQP3	0.0401054	-1.88781
205568_at	AQP9	0.0333605	1.71999
206177_s_at	ARG1	0.0370584	6.37557
231662_at	ARG1	0.0479295	4.41654
211935_at	ARL6IP1	0.0275313	1.45285
213513_x_at	ARPC2	0.020877	1.47179
221483_s_at	ARPP19	0.0255793	1.46719
224790_at	ASAP1	0.0324912	2.28398
224796_at	ASAP1	0.0412029	1.66632
226513_at	ASB7	0.0479295	1.52448
209517_s_at	ASH2L	0.0391493	1.36078
1554816_at	ASTN2	0.0285646	-2.58256
203952_at	ATF6	0.0322877	1.61616
226941_at	ATF6	0.0165291	1.78854
218673_s_at	ATG7	0.0294031	1.78298
40489_at	ATN1	0.0473844	-1.64425
1564064_a_at	ATP11B	0.0227313	1.86439
201322_at	ATP5B	0.00315347	1.65634
217801_at	ATP5E	0.0444816	1.61249
210149_s_at	ATP5H	0.0303728	1.55738
207573_x_at	ATP5L	0.0126486	1.88631
208746_x_at	ATP5L	0.0131554	1.81351
210453_x_at	ATP5L	0.0127009	1.82051
200096_s_at	ATP6V0E1	0.0355278	1.51446
208898_at	ATP6V1D	0.01551	1.65327
203232_s_at	ATXN1	0.0211182	1.65878
217321_x_at	ATXN3	0.049647	-2.15301
204092_s_at	AURKA	0.0203312	1.93617
210205_at	B3GALT4	0.0373717	1.66298
203051_at	BAHD1	0.0461547	-1.43407
203080_s_at	BAZ2B	0.0387574	1.98472
205681_at	BCL2A1	0.037578	2.94167
223915_at	BCOR	0.00805227	-1.86417
208946_s_at	BECN1	0.00809126	1.51143
202095_s_at	BIRC5	0.03916	2.61891
226853_at	BMP2K	0.0452812	1.79415
206464_at	BMX	0.03075	3.79581
41512_at	BRAP	0.0383661	1.54393
223376_s_at	BRI3	0.0108796	1.94494
202427_s_at	BRP44	0.00973992	1.68004
202279_at	C14orf2	0.0384303	2.14129
210532_s_at	C14orf2	0.031735	2.31002
205781_at	C16orf7	0.0127009	2.16401
225183_at	C16orf72	0.0355278	1.5388
228373_at	C16orf72	0.0174938	1.78189
1566480_x_at	C17orf104	0.04035	-2.1156
1557206_at	C17orf104	0.0433743	-3.33236
221190_s_at	C18orf8	0.019943	1.53796
219097_x_at	C19orf42	0.0435529	1.55457
224717_s_at	C19orf42	0.0131952	1.99863
229650_s_at	C19orf42	0.0455257	1.63214
235568_at	C19orf59	0.0162089	3.99576
212574_x_at	C19orf6	0.0492712	-1.54165
213985_s_at	C19orf6	0.0163377	-1.87825
228532_at	C1orf162	0.0442229	1.48794
219420_s_at	C1orf163	0.0227313	2.0712
218448_at	C20orf11	0.0492712	1.52
217835_x_at	C20orf24	0.020873	1.68946
224376_s_at	C20orf24	0.027964	1.69938
206656_s_at	C20orf3	0.0070222	1.80816
217737_x_at	C20orf43	0.0353243	1.76599
234926_s_at	C20orf43	0.0352826	1.59526
224575_at	C3orf10	0.0488482	1.30625
226891_at	C3orf21	0.0308019	1.80561
201677_at	C3orf37	0.0497341	-1.64589
241817_at	C3orf62	0.0494966	2.09139
224602_at	C4orf3	0.0209783	1.71924
238411_x_at	C5orf13	0.0235649	-3.90493
224707_at	C5orf32	0.0370341	1.98556
1554486_a_at	C6orf114	0.0193661	-2.53744
233438_at	C6orf162	0.0286281	-2.75238
218008_at	C7orf42	0.0294253	1.64963
236013_at	CACNA1E	0.0436462	3.85179
210817_s_at	CALCOCO2	0.0364508	1.55527
46323_at	CANT1	0.0485113	1.70939
221732_at	CANT1	0.0352826	1.82245
1562368_at	CARD11	0.0353243	-1.91305
212971_at	CARS	0.021713	1.67856
207842_s_at	CASC3	0.019418	1.6255
1552689_at	CASKIN1	0.0251206	-1.85919
206011_at	CASP1	0.016756	1.83434
209970_x_at	CASP1	0.0275313	2.02659
211366_x_at	CASP1	0.0462882	1.91415
211368_s_at	CASP1	0.0286478	1.92606
1560599_a_at	CCDC123	0.040369	-1.85669
226515_at	CCDC127	0.0141789	2.16092
225523_at	CCDC142 /// MRPL53	0.0352826	1.67313
1557366_at	CCDC144B	0.0324912	-4.45541
1561271_at	CCDC144C	0.020877	-3.23191
228320_x_at	CCDC64	0.0227313	-1.87644
214710_s_at	CCNB1	0.0455257	2.53608
202705_at	CCNB2	0.0149471	3.17373
1554283_at	CCRN4L	0.0492307	1.73466
208653_s_at	CD164	0.031885	2.054
220674_at	CD22	0.0391493	-1.97335
204489_s_at	CD44	0.0403231	1.32551
204118_at	CD48	0.0473844	1.59296
201926_s_at	CD55	0.0208878	2.10906
1555950_a_at	CD55	0.0338428	2.01937
200983_x_at	CD59	0.0109411	2.62517
212463_at	CD59	0.0461059	1.76588
205297_s_at	CD79B	0.0286478	-2.06478
210895_s_at	CD86	0.0355278	2.0491
202878_s_at	CD93	0.0246506	1.68563
218157_x_at	CDC42SE1	0.0463548	1.50521
226661_at	CDCA2	0.043906	2.65654
215329_s_at	CDK11A /// CDK11B	0.0468842	-1.54348
212899_at	CDK19	0.0497341	1.67752
203973_s_at	CEBPD	0.0332172	1.92504
1554569_a_at	CELF2	0.037218	1.69556
234023_s_at	CENPJ	0.0461628	-2.36783
238535_at	CEP152	0.0461547	-2.09413
237367_x_at	CFLAR	0.0283404	1.96612
55093_at	CHPF2	0.0315728	2.22697
220210_at	CHRNA10	0.0497341	1.92779
200998_s_at	CKAP4	0.0307346	2.45076
219161_s_at	CKLF	0.00774238	2.19032
221058_s_at	CKLF	0.0131484	2.55011
223451_s_at	CKLF	0.0297657	1.91975
1552772_at	CLEC4D	0.03046	3.18769
1552773_at	CLEC4D	0.036952	3.19069
219859_at	CLEC4E	0.0296398	3.48551
219890_at	CLEC5A	0.0305499	3.42811
225759_x_at	CLMN	0.00973992	2.58582
221845_s_at	CLPB	0.0339048	1.76079
218728_s_at	CNIH4	0.0193265	2.47726
223993_s_at	CNIH4	0.0174938	2.33231
228437_at	CNIH4	0.03916	2.02426
217749_at	COPG	0.023775	1.66929
203880_at	COX17	0.0165179	2.08993
227363_s_at	COX4NB	0.0245453	1.65205
213736_at	COX5B	0.0141789	1.69076
201256_at	COX7A2L	0.0351142	1.39203
201940_at	CPD	0.023153	2.06827
201941_at	CPD	0.01551	2.13708
201942_s_at	CPD	0.0209783	2.81483
201943_s_at	CPD	0.00770008	2.86158
229600_s_at	CPD	0.0308019	1.94111
224828_at	CPEB4	0.0294013	3.05586
202119_s_at	CPNE3	0.0171535	1.45828
233563_s_at	CPSF3L	0.0432099	-1.68604
244313_at	CR1	0.0309132	2.21147
208488_s_at	CR1	0.0226039	2.83689
217484_at	CR1	0.0312205	2.37303
204313_s_at	CREB1	0.0287734	1.70654
214513_s_at	CREB1	0.0227313	1.7246
230511_at	CREM	0.021713	2.19762
221541_at	CRISPLD2	0.0491285	2.2264
1555889_a_at	CRTAP	0.0473004	1.62766
213091_at	CRTC1	0.0314914	-1.9885
219939_s_at	CSDE1	0.00967381	1.54948
222975_s_at	CSDE1	0.0222443	1.55453
220627_at	CST8	0.0408073	-2.08059
204971_at	CSTA	0.0171535	2.22675
1567912_s_at	CT45A1 /// CT45A2 /// CT45A3 /// CT45A4 /// CT45A5 /// CT45A6 /// LOC100133581	0.00523467	-15.5337
200035_at	CTDNEP1	0.0134596	1.60484
214377_s_at	CTRL	0.0472063	1.84685
203917_at	CXADR	0.0193661	-2.75304
223454_at	CXCL16	0.0315781	1.93213
216734_s_at	CXCR5	0.0462882	-1.46106
200046_at	DAD1	0.0159051	1.68376
222858_s_at	DAPP1	0.0455963	1.96745
222488_s_at	DCTN4	0.0171535	1.78298
217973_at	DCXR	0.035386	1.74989
215158_s_at	DEDD	0.0297657	1.36226
226659_at	DEF6	0.0427245	1.39181
219763_at	DENND1A	0.0491285	1.97232
209549_s_at	DGUOK	0.0455179	1.33539
226026_at	DIRC2	0.0494966	1.83031
217208_s_at	DLG1	0.03916	-2.21573
209157_at	DNAJA2	0.017453	1.72412
218435_at	DNAJC15	0.0431364	1.90909
208499_s_at	DNAJC3	0.0477109	1.82159
203912_s_at	DNASE1L1	0.0286478	1.57317
219921_s_at	DOCK5	0.0173464	2.90998
223553_s_at	DOK3	0.0443784	1.76945
220939_s_at	DPP8	0.042604	1.55697
241199_x_at	DPPA4	0.0286478	-3.58715
201041_s_at	DUSP1	0.027964	2.09288
201999_s_at	DYNLT1	0.0298681	1.70416
218660_at	DYSF	0.0448905	2.03649
202623_at	EAPP	0.0354669	1.7428
201135_at	ECHS1	0.0491285	1.40443
216667_at	ECRP /// RNASE2	0.0294253	3.20333
220759_at	EDDM3B	0.0443784	1.608
213310_at	EIF2C2	0.0441905	2.44046
225940_at	EIF4E3	0.0332285	2.31855
225941_at	EIF4E3	0.0146531	1.89952
201766_at	ELAC2	0.0141789	-2.66351
31845_at	ELF4	0.0285646	1.70535
226789_at	EMB	0.00978934	1.54295
234464_s_at	EME1	0.0301792	1.46857
201325_s_at	EMP1	0.0480405	3.08137
203729_at	EMP3	0.0357375	1.49127
201231_s_at	ENO1	0.0108136	1.89429
209473_at	ENTPD1	0.0148013	2.09515
243111_at	ENTPD1	0.0477214	1.92806
1555826_at	EPR1	0.0303728	3.06498
224576_at	ERGIC1	0.0131554	1.7014
226416_at	ERI1	0.0415246	1.54352
225750_at	ERO1L	0.0297657	1.61545
201573_s_at	ETF1	0.0167467	1.57222
201574_at	ETF1	0.0244881	1.60247
201931_at	ETFA	0.0352826	1.68088
211742_s_at	EVI2B	0.0408073	1.51176
58696_at	EXOSC4	0.0443784	1.41005
239198_at	EZH1	0.0461547	2.23116
204714_s_at	F5	0.0373815	2.36943
203274_at	F8A1 /// F8A2 /// F8A3	0.0152481	1.63291
218080_x_at	FAF1	0.0324698	2.19445
224783_at	FAM100B	0.0108136	2.01556
212400_at	FAM102A	0.021566	-2.32511
214947_at	FAM105A	0.0433743	2.00571
221267_s_at	FAM108A1	0.00914874	-1.8895
225395_s_at	FAM120AOS	0.02968	1.67283
222929_at	FAM160B2	0.0242161	-1.96183
222205_x_at	FAM182B	0.03916	-2.22016
1566865_at	FAM200A	0.0297657	-3.03472
214946_x_at	FAM21A /// FAM21B /// FAM21C /// FAM21D	0.0443784	1.41597
217916_s_at	FAM49B	0.0126486	1.9478
236029_at	FAT3	0.036952	-3.97154
209004_s_at	FBXL5	0.0372687	1.69173
209005_at	FBXL5	0.0455299	1.88127
211816_x_at	FCAR	0.021566	3.65979
204232_at	FCER1G	0.0407435	1.38503
1553196_a_at	FCRL3	0.0413715	-2.60398
224403_at	FCRL4	0.0193661	-3.25188
215000_s_at	FEZ2	0.0477109	1.55152
227948_at	FGD4	0.0373815	2.1406
239178_at	FGF9	0.0272959	-3.90863
219718_at	FGGY	0.03075	1.77908
200709_at	FKBP1A	0.0375981	1.5067
220828_s_at	FLJ11292	0.0085483	-2.41297
1557895_at	FLJ35934	0.00458943	-5.24335
229521_at	FLJ36031	0.0307346	2.62711
1558579_at	FLJ37786	0.0254891	-3.44837
231882_at	FLJ39632	0.0118025	-5.43223
234106_s_at	FLYWCH1	0.0305499	-1.8789
222692_s_at	FNDC3B	0.0352826	2.20416
217487_x_at	FOLH1	0.0127009	-2.78148
218880_at	FOSL2	0.0350858	2.1462
214211_at	FTH1	0.0163377	1.87111
211628_x_at	FTH1P5	0.0173066	1.6929
223120_at	FUCA2	0.0232953	1.81334
218084_x_at	FXYD5	0.0403392	1.49042
224252_s_at	FXYD5	0.044766	1.5244
208283_at	GAGE1	0.0070222	-5.46911
1568618_a_at	GALNT1	0.019418	1.56562
223991_s_at	GALNT2	0.0173066	1.79816
214869_x_at	GAPVD1	0.0445036	1.67097
209093_s_at	GBA /// GBAP1	0.0477109	1.69281
219473_at	GDAP2	0.0386479	1.57872
207131_x_at	GGT1	0.0455206	1.74178
1554510_s_at	GHITM	0.0151237	1.53471
204982_at	GIT2	0.0404535	1.74841
215977_x_at	GK	0.0308019	2.23847
217167_x_at	GK	0.0473844	2.06014
215966_x_at	GK3P	0.0297657	2.17721
209276_s_at	GLRX	0.0461547	1.88354
226177_at	GLTP	0.00927026	1.7445
1562089_at	GLYATL1	0.0298681	-3.0032
217819_at	GOLGA7	0.0355278	1.4699
208797_s_at	GOLGA8A	0.0386479	-1.86889
201057_s_at	GOLGB1	0.0381389	1.66209
210007_s_at	GPD2	0.03916	1.60403
225447_at	GPD2	0.0307346	1.71648
227769_at	GPR27	0.0473844	2.23691
220404_at	GPR97	0.0492712	2.65629
206730_at	GRIA3	0.037218	-2.78738
202848_s_at	GRK6	0.019418	2.57491
210981_s_at	GRK6	0.0174938	1.78936
211543_s_at	GRK6	0.0226039	2.00738
201554_x_at	GYG1	0.0226039	2.0029
211275_s_at	GYG1	0.00676567	2.01838
204805_s_at	H1FX	0.0412029	-1.68645
231004_s_at	H1FX	0.0085483	-1.89334
200853_at	H2AFZ	0.0114253	1.55977
213911_s_at	H2AFZ	0.0245453	1.57934
206643_at	HAL	0.0492712	1.86646
241498_at	HARBI1	0.0499647	1.55166
202299_s_at	HBXIP	0.0357656	1.57216
202300_at	HBXIP	0.0108136	1.84275
203745_at	HCCS	0.0296398	1.80629
232975_at	HCG18	0.0104594	-2.29407
228813_at	HDAC4	0.0332285	1.61309
203974_at	HDHD1	0.0432702	1.57375
203430_at	HEBP2	0.0152191	2.04359
232080_at	HECW2	0.035298	2.55841
212966_at	HIC2	0.0227313	-2.23221
207764_s_at	HIPK3	0.0373717	2.08692
226297_at	HIPK3	0.0339493	1.46892
207982_at	HIST1H1T	0.043906	2.14707
214472_at	HIST1H2AD /// HIST1H3D	0.0266299	2.96914
218726_at	HJURP	0.0375981	2.21029
214938_x_at	HMGB1	0.0227313	1.52715
211933_s_at	HNRNPA3 /// HNRNPA3P1	0.0148013	1.39619
202072_at	HNRNPL	0.0173464	2.67198
209513_s_at	HSDL2	0.0461547	1.77522
209448_at	HTATIP2	0.0357407	1.82647
220249_at	HYAL4	0.0360063	2.04235
201193_at	IDH1	0.0273553	1.70876
212221_x_at	IDS	0.0227313	1.4508
223626_x_at	IFI27L2	0.00506622	1.94106
204191_at	IFNAR1	0.0312205	2.12572
225669_at	IFNAR1	0.0496432	1.66668
204785_x_at	IFNAR2	0.0494438	1.55454
210904_s_at	IL13RA1	0.0375584	1.95542
207072_at	IL18RAP	0.0404535	2.3994
202948_at	IL1R1	0.0455898	2.53315
205403_at	IL1R2	0.0385358	2.3351
201234_at	ILK	0.044766	1.50026
229582_at	INO80C	0.0475287	1.46514
1568830_at	IRAK3	0.0227313	3.32654
220034_at	IRAK3	0.0108136	2.46779
209075_s_at	ISCU	0.0283404	1.50504
239101_at	ITCH	0.0296398	2.48997
221449_s_at	ITFG1	0.0246506	1.64016
205786_s_at	ITGAM	0.0131484	1.84666
201188_s_at	ITPR3	0.0217504	-1.55484
223104_at	JAGN1	0.0222443	1.68785
201648_at	JAK1	0.0127009	1.4514
212723_at	JMJD6	0.0493288	1.56952
200048_s_at	JTB	0.0431898	1.52092
210434_x_at	JTB	0.0108136	1.7427
210927_x_at	JTB	0.0409555	1.50146
203752_s_at	JUND	0.0436843	1.50593
206765_at	KCNJ2	0.043906	1.83118
212188_at	KCTD12	0.019418	1.86264
229837_s_at	KCTD5	0.0361812	-1.56853
213003_s_at	KIAA0146	0.0455299	2.10743
212735_at	KIAA0226	0.0455898	1.66719
201777_s_at	KIAA0494	0.03916	1.53612
1554438_at	KIAA1217	0.0333605	-2.0922
233893_s_at	KIAA1530	0.010593	1.80835
215750_at	KIAA1659	0.017453	-3.71911
225718_at	KIAA1715	0.0492712	2.71186
230166_at	KIAA1958	0.0416872	2.23413
225878_at	KIF1B	0.0377659	2.1723
218755_at	KIF20A	0.0163377	3.02434
218355_at	KIF4A	0.0401054	3.49397
224606_at	KLF6	0.0228638	1.44945
202055_at	KPNA1	0.0176182	1.54774
202056_at	KPNA1	0.043906	1.6337
213741_s_at	KPNA1	0.0403043	1.50972
201088_at	KPNA2	0.0354649	1.73922
224885_s_at	KRTCAP2	0.0328343	1.58324
203041_s_at	LAMP2	0.0275313	1.82264
203042_at	LAMP2	0.0307346	1.84499
227013_at	LATS2	0.0246506	1.80124
238071_at	LCN10 /// LCN6	0.0443784	-2.12498
244598_at	LCP2	0.0342676	1.76038
213371_at	LDB3	0.0361362	-3.01627
200650_s_at	LDHA	0.0484895	1.33344
207409_at	LECT2	0.0108796	-5.66596
212658_at	LHFPL2	0.0152481	2.25323
210784_x_at	LILRA6 /// LILRB3	0.043906	1.77485
211336_x_at	LILRB1	0.0492712	1.64504
210225_x_at	LILRB3	0.0473844	1.75806
202193_at	LIMK2	0.0405516	2.07477
206440_at	LIN7A	0.0297657	2.38684
201847_at	LIPA	0.031735	1.55325
228107_at	LOC100127983	0.03916	3.00162
78383_at	LOC100129250	0.017453	3.03441
221979_at	LOC100129250	0.0251206	2.54608
224110_at	LOC100133319	0.0473844	-2.70595
231231_at	LOC100286993	0.0238104	-3.59269
236898_at	LOC100288781	0.0307346	3.61631
214809_at	LOC100294145	0.031735	-2.09313
241943_at	LOC100505833	0.0328602	-2.30417
239138_at	LOC100506638	0.0488482	1.82562
241353_s_at	LOC100507507	0.0275313	1.87583
242012_at	LOC100508147	0.037218	-1.71807
242663_at	LOC148189	0.0384303	-3.71416
1562527_at	LOC283027	0.0118025	-4.1921
1558982_at	LOC375010	0.0257977	-2.78436
1560119_at	LOC389634	0.02878	-2.09106
1555707_at	LOC445341	0.0292324	-3.07964
1554949_at	LOC554174	0.0278975	-1.80974
238449_at	LOC595101	0.0473844	-2.21431
1558128_at	LOC730202	0.0412029	-1.81367
206960_at	LPAR4	0.0278975	-5.77121
202822_at	LPP	0.0224196	1.88025
235347_at	LRCH3	0.0477109	-1.67724
228648_at	LRG1	0.0364592	2.47098
1562939_at	LRRC16A	0.0419606	-2.84447
1569124_at	LRRC63	0.0463548	1.53089
225593_at	LSM10	0.0324698	1.60794
212532_s_at	LSM12	0.0461547	1.44811
1557066_at	LUC7L	0.0473844	-1.73856
223295_s_at	LUC7L	0.0479295	-1.60431
203897_at	LYRM1	0.0434936	1.52456
226919_at	LYRM2	0.0491285	-2.24061
214242_at	MAN1A2	0.0473844	-1.78999
205698_s_at	MAP2K6	0.027628	2.08992
225927_at	MAP3K1	0.00391777	1.65579
242581_at	MAP3K15	0.035298	-2.41513
206571_s_at	MAP4K4	0.0100312	2.12787
212271_at	MAPK1	0.00458943	2.05514
210059_s_at	MAPK13	0.0348078	1.85612
210449_x_at	MAPK14	0.0172396	2.34554
211561_x_at	MAPK14	0.0104594	2.56311
202568_s_at	MARK3	0.0413715	1.6568
227833_s_at	MBD6	0.0316567	1.54452
213288_at	MBOAT2	0.0108136	2.80954
1554730_at	MCTP1	0.0251206	2.88342
229005_at	MCTP2	0.0324912	2.08322
229021_at	MCTP2	0.0386991	1.7883
218163_at	MCTS1	0.0173066	1.84872
209397_at	ME2	0.0456836	1.54369
210153_s_at	ME2	0.0375048	1.70033
235077_at	MEG3	0.043925	-2.16996
222447_at	METTL9	0.0222443	1.7835
226220_at	METTL9	0.0419974	1.8374
204152_s_at	MFNG	0.0377659	-1.66814
223974_at	MGC11082	0.035386	2.45623
201403_s_at	MGST3	0.0461547	1.58001
229675_at	MINA	0.0475287	-1.68763
224917_at	MIR21	0.0332172	2.04055
209467_s_at	MKNK1	0.0301369	1.89186
217910_x_at	MLX	0.0353243	1.45249
203435_s_at	MME	0.0412029	2.03382
203936_s_at	MMP9	0.0235649	3.96255
221381_s_at	MORF4 /// MORF4L1	0.0441905	1.51041
217982_s_at	MORF4L1	0.044994	1.31232
218865_at	MOSC1	0.01551	3.46548
215692_s_at	MPPED2	0.0227313	-3.33311
227747_at	MPZL3	0.0251206	1.74396
223743_s_at	MRPL4	0.0416577	-1.67403
223280_x_at	MS4A6A	0.0360025	1.66773
224356_x_at	MS4A6A	0.0297657	1.72403
224765_at	MSL1	0.0322877	1.49096
207551_s_at	MSL3	0.0314914	1.88609
205323_s_at	MTF1	0.0477109	1.65181
225206_s_at	MTRF1L	0.0436194	1.78596
209124_at	MYD88	0.0419974	1.52559
1568926_x_at	MYLK3	0.00458943	-3.56003
45526_g_at	NAT15	0.0475287	1.67944
209062_x_at	NCOA3	0.0364592	2.02866
1560207_at	NCRNA00255	0.0360406	-2.78283
226227_x_at	NCRNA00275	0.0475287	1.77612
226835_s_at	NCRNA00275	0.039791	1.77298
214279_s_at	NDRG2	0.0444816	-2.06288
230501_at	NDUFA10	0.0456284	-2.19398
218320_s_at	NDUFB11	0.0296398	1.57926
203371_s_at	NDUFB3	0.0477109	2.28953
203606_at	NDUFS6	0.0127009	1.74769
213673_x_at	NENF	0.0490285	1.82572
203574_at	NFIL3	0.0365088	2.0092
209239_at	NFKB1	0.0377659	1.59784
224304_x_at	NIN	0.0332172	1.56034
212129_at	NIPA2	0.0375981	1.5038
1562792_at	NIPAL1	0.0413715	1.78462
221104_s_at	NIPSNAP3B	0.0357541	2.07991
1554952_s_at	NLRP12	0.036952	2.24119
223944_at	NLRP12	0.0141789	2.16248
217962_at	NOP10	0.00978934	1.62376
210756_s_at	NOTCH2	0.0277041	2.76257
240440_at	NPL	0.0146531	2.02112
243066_at	NPL	0.0413715	2.18587
209506_s_at	NR2F1	0.0247475	-2.04291
208709_s_at	NRD1	0.0375981	1.67009
232149_s_at	NSMAF	0.0339493	1.74209
238515_at	NUDT16	0.0195649	2.37774
212181_s_at	NUDT4 /// NUDT4P1	0.0443784	1.55999
224939_at	NUFIP2	0.0245453	1.67469
224958_at	NUFIP2	0.017453	2.00249
214250_at	NUMA1	0.0278975	-2.03055
214251_s_at	NUMA1	0.0286478	-1.84314
212315_s_at	NUP210	0.0345236	-1.5454
202155_s_at	NUP214	0.0036053	2.13196
232960_at	NUP62CL	0.0303338	-2.46143
210793_s_at	NUP98	0.0387529	2.03364
202397_at	NUTF2	0.0340525	1.80093
219975_x_at	OLAH	0.0432099	6.41545
222945_x_at	OLAH	0.04955	4.17704
234521_at	OR51I2	0.0204494	1.68163
205085_at	ORC1	0.0477214	1.54648
200714_x_at	OS9	0.0296398	1.4471
224637_at	OST4	0.031735	1.64224
206048_at	OVOL2	0.0104594	-5.22455
208676_s_at	PA2G4	0.0119019	1.82477
214794_at	PA2G4	0.0427245	1.72808
215823_x_at	PABPC1 /// RLIM	0.0332285	1.46516
200815_s_at	PAFAH1B1	0.00506622	1.99611
224777_s_at	PAFAH1B2	0.031735	1.63279
214607_at	PAK3	0.0266299	-2.84283
218809_at	PANK2	0.0451055	1.40893
212718_at	PAPOLA	0.0173464	1.51177
212720_at	PAPOLA	0.016161	2.23787
224940_s_at	PAPPA	0.0148013	-5.15321
218271_s_at	PARL	0.0278051	1.48937
219148_at	PBK	0.0435529	2.87777
204031_s_at	PCBP2	0.0456292	1.47275
221957_at	PDK3	0.0242161	2.1583
228959_at	PDK3	0.0246506	1.80469
220865_s_at	PDSS1	0.0473844	1.8688
238957_at	PDXDC2	0.0173066	-2.72632
232213_at	PELI1	0.043906	1.96198
201507_at	PFDN1	0.0322877	1.55819
202464_s_at	PFKFB3	0.0277041	1.77424
228499_at	PFKFB4	0.0381389	2.16659
200886_s_at	PGAM1	0.0260202	1.47858
203501_at	PGCP	0.018997	2.10302
208454_s_at	PGCP	0.0339493	1.97486
201968_s_at	PGM1	0.0312217	1.67485
222622_at	PGP	0.031735	1.87143
1554153_a_at	PHF21A	0.031735	1.80256
203278_s_at	PHF21A	0.0333605	1.52599
1559479_at	PI4K2B	0.0477109	-1.96891
204297_at	PIK3C3	0.0461547	1.5091
227645_at	PIK3R5	0.0238104	1.63999
214866_at	PLAUR	0.0435529	1.90481
216551_x_at	PLCG1	0.0209783	-1.76326
202122_s_at	PLIN3	0.0477109	1.71118
227276_at	PLXDC2	0.0187425	2.26614
213241_at	PLXNC1	0.0473844	1.70566
202337_at	PMF1	0.0343814	1.99198
225844_at	POLE4	0.0297657	1.99487
242912_at	POTEM	0.0193661	-2.632
226074_at	PPM1M	0.0459932	1.61479
216347_s_at	PPP1R13B	0.044899	-1.46487
222662_at	PPP1R3B	0.0477214	1.78271
202313_at	PPP2R2A	0.0273553	1.62296
202187_s_at	PPP2R5A	0.0266299	1.7144
203529_at	PPP6C	0.0152481	1.50293
202792_s_at	PPP6R2	0.0307346	-1.42922
201494_at	PRCP	0.0119019	1.71599
223032_x_at	PRELID1	0.017187	1.75052
224232_s_at	PRELID1	0.0465868	1.53744
218233_s_at	PRICKLE4 /// TOMM6	0.0387171	1.53183
225000_at	PRKAR2A	0.0416721	1.41876
202407_s_at	PRPF31	0.0148013	-1.91184
217794_at	PRR13	0.0297657	1.51053
238513_at	PRRG4	0.0209622	2.8621
229073_at	PRTG	0.0070222	-4.48725
203460_s_at	PSEN1	0.017453	1.62459
208799_at	PSMB5	0.0455179	1.8048
200830_at	PSMD2	0.00973992	1.59555
212015_x_at	PTBP1	0.0174938	-1.5296
225363_at	PTEN	0.0455963	1.54116
229535_at	PTPMT1	0.0492712	1.51351
203554_x_at	PTTG1	0.0173066	1.96078
200677_at	PTTG1IP	0.0421757	1.46244
205174_s_at	QPCT	0.0479295	2.01671
201482_at	QSOX1	0.0173066	2.05194
200863_s_at	RAB11A	0.00732938	1.76875
225177_at	RAB11FIP1	0.0446111	1.52469
209515_s_at	RAB27A	0.0445878	1.60798
217764_s_at	RAB31	0.0480405	1.47931
224710_at	RAB34	0.0246506	1.8467
211961_s_at	RAB7A	0.0165179	1.57418
208640_at	RAC1	0.020877	1.3521
1553185_at	RASEF	0.0108136	-2.64953
57540_at	RBKS	0.0461547	1.46662
218134_s_at	RBM22	0.0332172	1.53633
235045_at	RBM7	0.0387574	1.86186
225269_s_at	RBMS1	0.0152481	1.45931
218117_at	RBX1	0.0388042	1.79897
220202_s_at	RC3H2	0.0352826	1.53333
1561720_at	RECQL5	0.0351142	-3.97936
208872_s_at	REEP5	0.0101013	1.88108
234950_s_at	RFWD2	0.0377659	1.64776
209110_s_at	RGL2	0.0227313	1.78573
1555022_at	RGS12	0.00506622	-4.75277
203175_at	RHOG	0.0377659	1.694
212478_at	RMND5A	0.0404875	1.98091
213566_at	RNASE6	0.0232953	1.9723
221287_at	RNASEL	0.0401054	1.84437
201779_s_at	RNF13	0.0173464	2.18044
219104_at	RNF141	0.0174938	2.40697
227726_at	RNF166	0.0428854	-1.77724
236465_at	RNF175	0.0409585	1.94873
204668_at	RNF24	0.031789	2.17083
207223_s_at	ROD1	0.0479949	1.71775
225148_at	RPS19BP1	0.0292324	1.59462
217753_s_at	RPS26	0.0301792	2.13341
208904_s_at	RPS28	0.0384303	1.52394
201628_s_at	RRAGA	0.0146531	1.57645
209567_at	RRS1	0.0375584	-1.63549
219549_s_at	RTN3	0.0070222	1.7619
205863_at	S100A12	0.0413715	2.05366
201543_s_at	SAR1A	0.0206041	1.56241
205475_at	SCRG1	0.0492307	2.3598
224960_at	SCYL2	0.0435529	1.67861
203090_at	SDF2	0.017453	1.69579
221972_s_at	SDF4	0.0403043	-1.731
201290_at	SEC11A	0.0416577	1.37721
214257_s_at	SEC22B	0.0466218	1.46637
215641_at	SEC24D	0.0498239	2.60609
230215_at	SEC61A2	0.0491285	1.62605
203133_at	SEC61B	0.0400781	1.39771
225352_at	SEC62	0.0352826	2.49776
214243_s_at	SERHL /// SERHL2	0.0170772	-1.84825
217272_s_at	SERPINB13	0.0396434	-2.02574
206034_at	SERPINB8	0.0426674	1.87921
225850_at	SFT2D1	0.049863	1.42043
214838_at	SFT2D2	0.034404	1.60021
201810_s_at	SH3BP5	0.030328	1.65335
209090_s_at	SH3GLB1	0.00757718	1.98876
209091_s_at	SH3GLB1	0.017453	1.78163
210101_x_at	SH3GLB1	0.0296119	1.76869
224846_at	SHKBP1	0.0101013	2.10993
204157_s_at	SIK3	0.0273553	2.06151
202254_at	SIPA1L1	0.0432099	1.93144
233587_s_at	SIPA1L2	0.0309132	2.48874
232891_at	SIRPD	0.0491285	1.79006
206634_at	SIX3	0.0373815	-2.29722
217640_x_at	SKA1	0.0127009	2.19239
200711_s_at	SKP1	0.0403043	1.37853
200719_at	SKP1	0.0135716	1.77229
203761_at	SLA	0.0227313	1.59943
226741_at	SLC12A6	0.0174938	1.5757
200030_s_at	SLC25A3	0.0375699	1.3679
226179_at	SLC25A37	0.0359397	1.60151
237340_at	SLC26A8	0.0356333	3.66956
222088_s_at	SLC2A14 /// SLC2A3	0.0275737	2.14039
202497_x_at	SLC2A3	0.037218	2.13534
202499_s_at	SLC2A3	0.0104594	2.00755
219215_s_at	SLC39A4	0.0225014	2.17858
224595_at	SLC44A1	0.0387574	1.89169
219229_at	SLCO3A1	0.0108796	1.84519
203076_s_at	SMAD2	0.0413715	1.39977
209518_at	SMARCD1	0.0418433	1.45197
204099_at	SMARCD3	0.01551	2.12693
53912_at	SNX11	0.0375699	1.83379
220140_s_at	SNX11	0.0286478	1.72042
205482_x_at	SNX15	0.0352826	1.40595
221006_s_at	SNX27	0.0227313	2.22343
210648_x_at	SNX3	0.0309132	1.67079
217789_at	SNX6	0.0494966	1.43471
228479_at	SOAT1	0.02248	1.55665
230707_at	SORL1	0.0443784	1.90282
212807_s_at	SORT1	0.0173464	2.13581
202935_s_at	SOX9	0.0359278	-3.53682
224760_at	SP1	0.0333605	2.0213
222753_s_at	SPCS3	0.047002	1.86279
217827_s_at	SPG21	0.0228638	1.81653
232739_at	SPIB	0.0204969	-2.61632
203127_s_at	SPTLC2	0.0204969	2.12175
225095_at	SPTLC2	0.0193661	1.79405
220456_at	SPTLC3	0.0286478	-2.5563
217995_at	SQRDL	0.0386991	1.72852
202199_s_at	SRPK1	0.0119808	2.6748
208610_s_at	SRRM2	0.0494966	-1.88177
201004_at	SSR4	0.0140695	1.55788
235334_at	ST6GALNAC3	0.0280124	2.43133
205026_at	STAT5B	0.0455179	1.80617
207320_x_at	STAU1	0.021566	1.52421
213037_x_at	STAU1	0.0324698	1.41845
225987_at	STEAP4	0.0480405	1.70421
205214_at	STK17B	0.0173464	2.40161
208855_s_at	STK24	0.0432099	1.32668
225649_s_at	STK35	0.0405516	1.3583
205411_at	STK4	0.0489973	1.65665
225364_at	STK4	0.0163377	1.54398
201060_x_at	STOM	0.0118502	1.81254
52169_at	STRADA	0.0278975	1.67817
221554_at	STRADA	0.0342676	1.48742
217874_at	SUCLG1	0.0492307	1.40501
201483_s_at	SUPT4H1	0.0476687	1.46559
202565_s_at	SVIL	0.0456292	1.57081
200055_at	TAF10	0.0148013	1.70003
235154_at	TAF3	0.0455078	-1.7039
1553556_at	TAS2R40	0.0492712	1.696
240715_at	TBX5	0.0173464	-4.07219
204158_s_at	TCIRG1	0.0085483	2.15117
202384_s_at	TCOF1	0.0352826	-1.49731
208778_s_at	TCP1	0.0108136	1.5048
225840_at	TEF	0.0479295	-1.64849
204147_s_at	TFDP1	0.0328602	2.61753
212330_at	TFDP1	0.0227313	2.83549
206649_s_at	TFE3	0.0375048	1.72949
212457_at	TFE3	0.0352826	1.60383
212043_at	TGOLN2	0.021713	1.48707
222835_at	THSD4	0.0227313	-3.99578
216459_x_at	TIGD1L	0.0421757	-2.13193
225535_s_at	TIMM23	0.0286478	1.64945
203093_s_at	TIMM44	0.0232953	-1.62731
203167_at	TIMP2	0.00505538	2.86268
204924_at	TLR2	0.044803	1.77557
210166_at	TLR5	0.0222443	2.57478
229560_at	TLR8	0.0297703	1.7751
209149_s_at	TM9SF1	0.0432099	1.84158
222845_x_at	TMBIM4	0.0352527	1.4421
223892_s_at	TMBIM4	0.0246939	1.56016
200803_s_at	TMBIM6	0.0266299	1.69738
214958_s_at	TMC6	0.0246506	-1.71103
224680_at	TMED4	0.0248448	1.31632
212165_at	TMEM183A /// TMEM183B	0.0217504	1.84738
201002_s_at	TMEM189-UBE2V1 /// UBE2V1	0.0462351	1.55314
225492_at	TMEM33	0.036952	1.77876
235907_at	TMEM33	0.0195649	2.08574
217766_s_at	TMEM50A	0.0381389	1.35988
222401_s_at	TMEM50A	0.0308019	1.55828
200620_at	TMEM59	0.042604	1.45647
222507_s_at	TMEM9B	0.0278975	1.74313
210847_x_at	TNFRSF25	0.044766	-2.20304
211841_s_at	TNFRSF25	0.0377659	-2.3282
219423_x_at	TNFRSF25	0.0381389	-2.12728
203839_s_at	TNK2	0.0395309	1.9873
225766_s_at	TNPO1	0.0408908	1.61105
212409_s_at	TOR1AIP1	0.0246506	1.74404
209593_s_at	TOR1B	0.0440013	1.68384
214601_at	TPH1	0.044803	-3.44847
200743_s_at	TPP1	0.0455898	1.49993
213443_at	TRADD	0.0146531	-1.76233
224806_at	TRIM25	0.0483742	1.83867
210266_s_at	TRIM33	0.0461547	1.39264
212435_at	TRIM33	0.0435529	1.66861
1568592_at	TRIM69	0.0377659	1.64513
201546_at	TRIP12	0.0266299	1.51525
216454_at	TRMT1	0.0426271	-1.61163
221952_x_at	TRMT5	0.0339493	1.34628
201758_at	TSG101	0.0139697	1.66391
238973_s_at	TSNAX	0.0407435	2.31957
221002_s_at	TSPAN14	0.0426301	2.00115
215849_x_at	TTC18	0.0070222	-5.60967
212242_at	TUBA4A	0.0461547	1.64864
218965_s_at	TUT1	0.03916	-1.37132
208864_s_at	TXN	0.0106504	2.54337
216609_at	TXN	0.0144706	2.33287
201588_at	TXNL1	0.0386991	1.42039
222748_s_at	TXNL4B	0.0428854	1.88079
211763_s_at	UBE2B	0.01551	2.15108
202954_at	UBE2C	0.0166331	2.04444
201345_s_at	UBE2D2	0.0413715	1.35704
225783_at	UBE2F	0.0322877	1.82033
1557053_s_at	UBE2G2	0.0325073	-1.62968
1558088_a_at	UBE2I	0.0256386	-2.49679
222435_s_at	UBE2J1	0.0461059	1.88996
218011_at	UBL5	0.0332172	1.91929
222989_s_at	UBQLN1	0.0376897	1.78775
212008_at	UBXN4	0.0339493	1.80066
204881_s_at	UGCG	0.0325073	1.79323
221765_at	UGCG	0.0441664	1.82217
222470_s_at	UQCC	0.0297657	-1.61095
212600_s_at	UQCRC2	0.0352826	1.45005
201568_at	UQCRQ	0.048225	2.38692
221654_s_at	USP3	0.00936962	1.74293
226652_at	USP3	0.021906	1.56872
224979_s_at	USP36	0.0492712	-1.52554
232621_at	USP48	0.0280124	-2.66392
208780_x_at	VAPA	0.0225014	1.58358
204619_s_at	VCAN	0.0148772	2.46217
204620_s_at	VCAN	0.028587	1.79075
221731_x_at	VCAN	0.0435529	1.66792
1556228_a_at	VCPIP1	0.0275313	2.06538
211662_s_at	VDAC2	0.0461547	1.39773
236254_at	VPS13B	0.0307346	1.72806
217837_s_at	VPS24	0.0291107	1.5857
217727_x_at	VPS35	0.0238104	1.4493
239552_at	VWDE	0.0477642	-4.61907
38964_r_at	WAS	0.0312205	1.62722
212602_at	WDFY3	0.0286478	2.58279
200609_s_at	WDR1	0.0127009	1.57033
224897_at	WDR26	0.0328602	1.77148
222763_s_at	WDR33	0.037218	1.53668
201294_s_at	WSB1	0.0297657	2.88836
201296_s_at	WSB1	0.0381389	1.66831
210561_s_at	WSB1	0.0247475	1.80922
222581_at	XPR1	0.0381389	1.57065
207598_x_at	XRCC2	0.0498239	-2.56154
208643_s_at	XRCC5	0.0382454	1.33735
214733_s_at	YIPF1	0.0246506	1.75413
217717_s_at	YWHAB	0.0432099	1.49168
200640_at	YWHAZ	0.0353133	1.39256
225665_at	ZAK	0.0354669	2.38483
216844_at	ZC3H7B	0.0105098	-3.77106
225634_at	ZC3HAV1	0.0297657	1.68123
236155_at	ZCCHC6	0.031735	2.01675
238800_s_at	ZCCHC6	0.039762	1.81057
220618_s_at	ZCWPW1	0.0442229	-1.66253
208033_s_at	ZFHX3	0.0339493	-1.60664
233751_at	ZFHX3	0.0237661	-2.20049
201367_s_at	ZFP36L2	0.0245453	-2.11677
224636_at	ZFP91	0.0246506	1.31758
1570135_at	ZNF230	0.0193661	2.88031
218401_s_at	ZNF281	0.0307346	1.98375
222619_at	ZNF281	0.0118025	2.57785
1569250_at	ZNF333	0.0386479	2.27326
202010_s_at	ZNF410	0.0361948	1.42386
215429_s_at	ZNF428	0.047002	-1.71116
232137_at	ZNF616	0.035298	-2.3631
219047_s_at	ZNF668	0.0303728	1.72131
213542_at	ZNF710	0.0388808	-1.76358
1569637_at	ZNF736	0.0269482	-2.38419
228009_x_at	ZNRD1	0.031735	1.90464
234457_at	ZNRD1-AS	0.0354669	-3.07767
225138_at	ZRANB1	0.0479295	1.63248
3h_UniqueToMale
		FDR p-value	Fold-Change	FDR p-value	Fold-Change
Probe Set ID	Gene Symbol_1	CE-Stroke * F vs. VRF-Control * F	CE-Stroke * F vs. VRF-Control * F	CE-Stroke * M vs. VRF-Control * M	CE-Stroke * M vs. VRF-Control * M
202053_s_at	ALDH3A2			0.0344886	1.86711
209935_at	ATP2C1			0.0343667	1.96491
223846_at	AZI2			0.044302	1.9838
1553959_a_at	B3GALT6			0.0485955	2.68391
213473_at	BRAP			0.0297659	1.87077
53071_s_at	C17orf101			0.0165544	1.77429
202217_at	C21orf33			0.0364924	1.48565
235533_at	COX19			0.0424642	1.97563
205384_at	FXYD1			0.0157612	2.51183
225007_at	G3BP1			0.0366027	2.07619
229114_at	GAB1			0.0370813	2.27593
204374_s_at	GALK1			0.0386507	-1.72501
223252_at	HDGFRP2			0.0147668	-1.6241
227122_at	LOC100507237			0.044302	1.46668
1557717_at	LOC338862			0.0424642	-2.40506
222867_s_at	MED31			0.044302	1.54923
223354_x_at	MFF			0.0344886	1.99546
211061_s_at	MGAT2			0.0297659	1.72076
224332_s_at	MRPL43			0.0364924	1.81366
230068_s_at	PEG3-AS			0.0364924	-3.49649
201979_s_at	PPP5C			0.0428087	-1.67495
205332_at	RCE1			0.0377455	-1.60985
212202_s_at	TMEM87A			0.0424642	1.43374
212118_at	TRIM27			0.0387104	2.17449
218470_at	YARS2			0.0342984	1.79205
5h_CommonToFemaleAndMale
		FDR p-value	Fold-Change	FDR p-value	Fold-Change
Probe Set ID	Gene Symbol_1	CE-Stroke * F vs. VRF-Control * F	CE-Stroke * F vs. VRF-Control * F	CE-Stroke * M vs. VRF-Control * M	CE-Stroke * M vs. VRF-Control * M
201715_s_at	ACIN1	0.00521253	1.73697	0.04675	1.53159
244723_at	ACSM2A	0.00268743	-11.2421	0.0139723	-8.96704
206014_at	ACTL6B	0.0471324	1.38814	0.0459611	1.55467
202604_x_at	ADAM10	0.00499038	1.97661	0.0473227	1.64754
218091_at	AGFG1	0.00877854	2.30387	0.0466411	1.9979
218064_s_at	AKAP8L	0.00222039	-2.79445	0.0349486	-2.04109
223144_s_at	AKIRIN2	0.00899545	2.86249	0.0445727	2.56019
223145_s_at	AKIRIN2	0.00531796	2.27845	0.0453984	1.90832
223318_s_at	ALKBH7	0.00514205	-2.50774	0.034341	-2.19122
227438_at	ALPK1	0.0193023	1.98898	0.0445727	2.09878
228573_at	ANTXR2	0.0190259	1.87222	0.034341	2.0798
210278_s_at	AP4S1	0.00280722	-2.38141	0.0466672	-1.76677
221036_s_at	APH1B	0.00570213	2.40037	0.0473227	1.97795
215984_s_at	ARFRP1	0.0091149	-1.87901	0.0475682	-1.71302
218216_x_at	ARL6IP4	0.00700646	-2.15673	0.0492338	-1.86905
220597_s_at	ARL6IP4	0.00885553	-1.81943	0.0468856	-1.68696
226941_at	ATF6	0.00986982	1.83134	0.0425133	1.74201
209934_s_at	ATP2C1	0.0166563	1.46181	0.0250342	1.60515
208860_s_at	ATRX	0.00531073	2.45268	0.0471979	1.99862
210205_at	B3GALT4	0.00932637	1.80046	0.0290265	1.82373
1553959_a_at	B3GALT6	0.00602413	2.57451	0.0227628	2.55844
201882_x_at	B4GALT1	0.0170069	2.13258	0.0445727	2.19706
41512_at	BRAP	0.00822107	1.72363	0.0356904	1.66842
212645_x_at	BRE	0.0176037	1.56055	0.0445727	1.60317
202427_s_at	BRP44	0.0101265	1.71483	0.0467026	1.62574
1557548_at	C10orf108	0.0114054	-4.0732	0.04675	-3.73264
1555365_x_at	C11orf58	0.0035682	-5.37534	0.0139723	-5.46527
228114_x_at	C16orf13	0.0139789	-1.56846	0.0445727	-1.57319
205781_at	C16orf7	0.00446011	2.17038	0.0491532	1.73896
221587_s_at	C19orf24	0.00960094	-1.86696	0.0445727	-1.76434
225404_at	C1orf212	0.00681786	1.74954	0.0316204	1.69469
217737_x_at	C20orf43	0.0308921	1.79927	0.0390523	2.09458
201677_at	C3orf37	0.00419396	-1.83958	0.0473227	-1.52639
235076_at	CALCOCO2	0.0222693	1.83606	0.0445727	1.95666
221732_at	CANT1	0.0115034	1.98737	0.0373406	1.98993
46323_at	CANT1	0.0144551	1.86076	0.03768	1.92777
212971_at	CARS	0.0064727	1.74073	0.0250342	1.73984
1552689_at	CASKIN1	0.00954584	-1.73444	0.0424894	-1.67594
203984_s_at	CASP9	0.037592	1.58768	0.0311611	1.91894
1561271_at	CCDC144C	0.00527841	-4.21949	0.04675	-3.06127
205297_s_at	CD79B	0.00503024	-2.66642	0.0425133	-2.17344
214618_at	CFLAR	0.00981633	2.9621	0.0445727	2.71832
237367_x_at	CFLAR	0.00484524	2.25728	0.0445727	1.87585
221799_at	CHPF2	0.00446011	2.43337	0.0330042	2.0815
55093_at	CHPF2	0.00180541	2.9273	0.0322504	2.08834
204050_s_at	CLTA	0.00582597	-1.82219	0.034341	-1.69469
228306_at	CNIH4	0.00582597	2.29141	0.0445727	1.95058
227363_s_at	COX4NB	0.0115034	1.60252	0.0445727	1.5744
213736_at	COX5B	0.00602413	1.85566	0.0497169	1.62224
201943_s_at	CPD	0.00163767	3.66664	0.0227628	2.5064
217484_at	CR1	0.00743165	2.59298	0.0491	2.20063
213091_at	CRTC1	0.00551866	-2.26195	0.0424696	-1.96258
237040_at	CWF19L2	0.00582597	-2.60629	0.0424894	-2.19596
203917_at	CXADR	0.0222693	-2.44664	0.038085	-2.90714
222488_s_at	DCTN4	0.00800976	1.88578	0.0445727	1.72523
217973_at	DCXR	0.0180924	1.77159	0.047634	1.79714
1558080_s_at	DNAJC3	0.0160748	2.62628	0.0487309	2.54472
219921_s_at	DOCK5	0.00498464	3.40207	0.0253422	3.05971
202116_at	DPF2	0.00582597	2.41179	0.0250342	2.35583
203258_at	DRAP1	0.00681685	-1.82465	0.0390523	-1.71116
202623_at	EAPP	0.0192842	1.60399	0.0398267	1.68872
201766_at	ELAC2	0.00222039	-3.30987	0.034341	-2.29754
31845_at	ELF4	0.00503024	2.04449	0.04675	1.7258
226982_at	ELL2	0.00655558	2.67084	0.0253422	2.66108
[truncated: 15,221 more rows]

## Sheet: TableS2
TABLE S2. SIGNIFICANTLY ENRICHED CANONICAL PATHWYAS AT 3h, 5h AND 24h FOLLOWING CARDIOEMBOLIC STROKE IN MALE AND FEMALE.
3h_Female_CanonicalPathways
Ingenuity Canonical Pathways	-log(B-H p-value)	B-H p-value	Molecules
Toll-like Receptor Signaling	2.67	0.00213796	TLR2,MAP2K6,MAPK14,TLR5,MAPK1,MYD88,MAP3K1,TLR8,MAPK13,IRAK3,NFKB1,MAP4K4
PPARα/RXRα Activation	1.93	0.011749	MAP2K6,SMAD2,MAPK1,ADCY4,PRKAR2A,PLCG1,IL1R1,NFKB1,GK,ABCA1,ACVR1B,NCOA3,IL18RAP,IL1R2,NR2F1,MAPK14,GPD2,ADIPOR2,STAT5B,MAP4K4
Hypoxia Signaling in the Cardiovascular System	1.81	0.0154882	UBE2G2,UBE2J1,UBE2A,UBE2B,CREB1,UBE2D2,LDHA,UBE2F,PTEN,UBE2C,UBE2I
TREM1 Signaling	1.78	0.0165959	TLR2,TLR5,MAPK1,MYD88,TLR8,CASP1,PLCG1,CD86,STAT5B,NFKB1
IL-10 Signaling	1.73	0.0186209	IL1R2,MAP2K6,JAK1,MAPK14,SP1,MAPK1,MAPK13,IL1R1,NFKB1,MAP4K4,IL18RAP
CD28 Signaling in T Helper Cells	1.63	0.0234423	ACTR2,MAP3K1,RAC1,PIK3R5,PLCG1,NFKB1,CARD11,WAS,ARPC2,PIK3C3,ITPR3,FCER1G,CD86,LCP2
IL-1 Signaling	1.36	0.0436516	MAP2K6,GNB4,MAPK14,MAPK1,MYD88,ADCY4,MAP3K1,PRKAR2A,MAPK13,IL1R1,IRAK3,NFKB1
EGF Signaling	1.36	0.0436516	JAK1,MAPK14,MAPK1,PIK3C3,MAP3K1,ITPR3,PIK3R5,PLCG1,MAPK13
HMGB1 Signaling	1.36	0.0436516	MAP2K6,RHOG,MAPK14,SP1,HMGB1,MAPK1,PIK3C3,RAC1,PIK3R5,MAPK13,IL1R1,NFKB1
Mitochondrial Dysfunction	1.36	0.0436516	NDUFB3,COX17,NDUFA9,APH1B,COX7A2L,ATP5E,VPS9D1,NDUFB11,ATP5B,GPD2,UQCRC2,NDUFS6,NDUFA10,COX5B,UQCRQ,PSEN1
Renin-Angiotensin Signaling	1.34	0.0457088	MAPK1,ADCY4,MAP3K1,RAC1,PIK3R5,PRKAR2A,PLCG1,MAPK13,NFKB1,MAPK14,PAK3,PIK3C3,ITPR3
Glucocorticoid Receptor Signaling	1.33	0.0467735	SMAD2,JAK1,MAPK1,MAP3K1,PIK3R5,RAC1,MAPK13,TAF10,NFKB1,NR3C1,TSG101,SMARCA4,NCOA3,IL1R2,MAPK14,HMGB1,DUSP1,PIK3C3,ANXA1,CREB1,TAF3,STAT5B,UBE2I
FGF Signaling	1.33	0.0467735	MAP2K6,MAPK14,MAPK1,PIK3C3,FGF9,CREB1,MAP3K1,RAC1,PIK3R5,PLCG1,MAPK13
IL-15 Signaling	1.33	0.0467735	JAK1,MAPK14,MAPK1,PIK3C3,PIK3R5,PLCG1,MAPK13,STAT5B,NFKB1
3h_Male_CanonicalPathways
None significant at B-H p<0.05
5h_Female_CanonicalPathways
Ingenuity Canonical Pathways	-log(B-H p-value)	B-H p-value	Molecules
Toll-like Receptor Signaling	3.57	0.000269153	MAP2K6,MAP2K4,PPARA,MAPK1,MYD88,MAP3K1,TLR8,IRAK3,MAPK13,MAPK12,IRAK1,TLR2,TRAF6,TLR4,LY96,MAPK14,TLR5,MAP4K4,TAB1,TRAF1
B Cell Receptor Signaling	3.25	0.000562341	MAP2K4,MAP2K6,RAF1,GAB2,MAPK1,POU2F2,SOS2,PIK3R5,ABL1,KRAS,MAPK13,PTEN,SHC1,NFAT5,PPP3R1,PIK3C3,CREB1,CD22,GSK3B,MAP3K2,PIK3C2B,CD19,CD79B,FCGR2A,MAP3K1,RAC1,PPP3CC,TCF3,MAPK12,CREB5,EBF1,MAPK14,GAB1,DAPP1,PAG1,PIK3R6,BCL2A1
Role of JAK family kinases in IL-6-type Cytokine Signaling	3.25	0.000562341	MAP2K4,SOCS3,STAT5A,JAK1,MAPK14,MAPK1,MAPK10,OSM,STAT3,MAPK13,MAPK12,STAT5B
EGF Signaling	2.82	0.00151356	MAP2K4,PIK3C2B,RAF1,JAK1,MAPK1,SOS2,MAP3K1,PIK3R5,PLCG1,STAT3,MAPK13,MAPK12,SHC1,CSNK2A2,MAPK14,PIK3C3,ITPR3,PIK3R6
IL-22 Signaling	2.82	0.00151356	MAP2K4,SOCS3,STAT5A,JAK1,MAPK14,MAPK1,MAPK10,STAT3,MAPK13,MAPK12,STAT5B
IL-10 Signaling	2.74	0.0018197	MAP2K6,MAP2K4,SOCS3,IL4R,JAK1,MAPK1,IL10,FCGR2A,STAT3,MAPK13,IL1R1,MAPK12,IL18RAP,TRAF6,MAPK14,SP1,IL1RN,IL1RAPL1,MAP4K4,TAB1
IL-6 Signaling	2.61	0.00245471	MAP2K6,MAP2K4,SOCS3,RAF1,MAPK1,SOS2,PIK3R5,KRAS,MAPK13,SHC1,CYP19A1,PIK3C3,TAB1,PIK3C2B,TNFAIP6,TNFRSF1A,IL1R1,STAT3,MAPK12,IL18RAP,TRAF6,CSNK2A2,MAPK14,IL1RN,PIK3R6,MAPK10,IL1RAPL1,MAP4K4
FLT3 Signaling in Hematopoietic Progenitor Cells	2.57	0.00269153	STAT5A,PIK3C2B,GAB2,RAF1,MAPK1,SOS2,PIK3R5,KRAS,STAT3,MAPK13,CREB5,MAPK12,FLT3LG,SHC1,MAPK14,CBL,PIK3C3,CREB1,PIK3R6,STAT5B
GDNF Family Ligand-Receptor Interactions	2.39	0.0040738	MAP2K4,PIK3C2B,RAF1,MAPK1,SOS2,PIK3R5,RAC1,PLCG1,KRAS,DOK3,MAPK12,SHC1,PDLIM7,GAB1,PIK3C3,CREB1,ITPR3,MAPK10,PIK3R6
Hypoxia Signaling in the Cardiovascular System	2.39	0.0040738	P4HB,UBE2A,UBE2D2,UBE2R2,UBE2S,CREB5,UBE2F,PTEN,UBE2G2,UBE2J1,UBE2B,SUMO1,UBE2G1,CREB1,HIF1AN,UBE2D3,UBE2C,UBE2J2
Integrin Signaling	2.39	0.0040738	RAP2B,MAP2K4,RAF1,RAP2A,MPRIP,ARHGAP26,MAPK1,SOS2,ACTA2,MYLK3,PIK3R5,ABL1,KRAS,PTEN,BRAF,TSPAN3,SHC1,RHOG,PIK3C3,ILKAP,GSK3B,RHOF,CAPN10,VASP,PIK3C2B,ACTR2,PAK2,ASAP1,ARPC5L,RHOC,RAC1,PLCG1,TNK2,TTN,RAP1A,DOCK1,WAS,ARPC2,PIK3R6
Glucocorticoid Receptor Signaling	2.38	0.00416869	MAP2K4,RAF1,JAK1,MAPK1,HSPA1A/HSPA1B,POU2F2,SOS2,PIK3R5,KRAS,TAF10,MAPK13,CD163,NR3C1,SMARCA4,BCL2,SHC1,NFAT5,NCOA2,PPP3R1,PIK3C3,SUMO1,FOXO3,CREB1,GTF2H5,STAT5B,TAB1,POLR2J2/POLR2J3,SMAD2,PIK3C2B,STAT5A,IL10,MAP3K1,RAC1,GTF2F1,PPP3CC,STAT3,MAPK12,TSG101,NCOA3,TRAF6,TAF6L,MAPK14,DUSP1,IL1RN,POLR2E,MAPK10,PIK3R6,PTGS2
iNOS Signaling	2.38	0.00416869	JAK1,MAPK1,MYD88,IFNGR1,HMGA1,MAPK13,IRAK3,MAPK12,IRAK1,TRAF6,TLR4,LY96,MAPK14,TAB1
Molecular Mechanisms of Cancer	2.37	0.0042658	MAP2K4,RAP2B,GAB2,RAF1,JAK1,APH1B,MAPK1,ADCY4,SOS2,KRAS,MAPK13,RHOG,CASP9,GSK3B,BMP8B,RALGDS,TAB1,PIK3C2B,SMAD2,TFDP1,RAC1,ARHGEF17,TCF3,MAPK12,RAP1A,APC,CBL,GAB1,PIK3R6,MAPK10,LEF1,CFLAR,ARHGEF9,MAP2K6,RAP2A,PIK3R5,ABL1,PSENEN,BCL2,BRAF,SHC1,PIK3C3,CTNNB1,CASP8,RHOF,BMP1,PRKDC,PAK2,RHOC,APAF1,GNAQ,NAIP,NBN,FADD,MAPK14,ADCY1,RBPJ,PRKAR1A,PSEN1
Pancreatic Adenocarcinoma Signaling	2.36	0.00436516	MAP2K4,RAF1,JAK1,MAPK1,ABL1,PIK3R5,KRAS,BCL2,CASP9,PIK3C3,RALGDS,PIK3C2B,SMAD2,PLD3,TFDP1,RAC1,STAT3,MAPK12,BIRC5,PLD4,TGFA,PIK3R6,MAPK10,PTGS2,MMP9
Renin-Angiotensin Signaling	2.27	0.00537032	MAP2K4,RAF1,PTK2B,MAPK1,ADCY4,SOS2,PIK3R5,KRAS,MAPK13,SHC1,PIK3C3,PIK3C2B,PAK2,MAP3K1,RAC1,GNAQ,PLCG1,STAT3,MAPK12,MAPK14,ADCY1,ITPR3,MAPK10,PIK3R6,PRKAR1A
IL-15 Signaling	2.27	0.00537032	STAT5A,PIK3C2B,RAF1,JAK1,MAPK1,PIK3R5,PLCG1,KRAS,STAT3,MAPK13,MAPK12,BCL2,SHC1,MAPK14,PIK3C3,PIK3R6,STAT5B
ErbB2-ErbB3 Signaling	2.25	0.00562341	STAT5A,RAF1,PIK3C2B,MAPK1,SOS2,PIK3R5,KRAS,STAT3,PTEN,SHC1,SP1,ETV4,PIK3C3,PIK3R6,GSK3B,STAT5B
Fcγ Receptor-mediated Phagocytosis in Macrophages and Monocytes	2.16	0.00691831	ACTR2,GAB2,PLD3,PTK2B,MAPK1,FCGR2A,ARPC5L,ACTA2,RAC1,PLCG1,FYB,PTEN,PLD4,DOCK1,CBL,WAS,EZR,ARPC2,RAB11A,VASP,FGR,LCP2
HGF Signaling	2.14	0.00724436	MAP2K4,PIK3C2B,RAF1,MAPK1,SOS2,MAP3K1,PIK3R5,RAC1,PLCG1,KRAS,STAT3,MAPK12,RAP1A,DOCK1,ELF4,ELF2,GAB1,PIK3C3,HGF,MAPK10,PIK3R6,PTGS2,MAP3K2
HMGB1 Signaling	2.14	0.00724436	MAP2K6,MAP2K4,PIK3C2B,MAPK1,RHOC,TNFRSF1A,PIK3R5,RAC1,IFNGR1,KRAS,MAPK13,IL1R1,MAPK12,TLR4,RHOG,MAPK14,SP1,KAT6A,PIK3C3,MAPK10,PIK3R6,RHOF
Myc Mediated Apoptosis Signaling	2.14	0.00724436	MAP2K4,PIK3C2B,SOS2,APAF1,PIK3R5,KRAS,MAPK12,BCL2,FADD,SHC1,CASP9,PIK3C3,MAPK10,PIK3R6,CASP8,SFN
TREM1 Signaling	1.92	0.0120226	STAT5A,MAPK1,IL10,MYD88,TLR8,PLCG1,STAT3,IRAK1,TLR2,TLR4,TLR5,CD40,CASP1,STAT5B,CASP5
FGF Signaling	1.89	0.0128825	MAP2K6,PIK3C2B,RAF1,MAPK1,FGF9,SOS2,MAP3K1,RAC1,PIK3R5,PLCG1,STAT3,MAPK13,MAPK12,CREB5,MAPK14,GAB1,PIK3C3,HGF,CREB1,PIK3R6
Mouse Embryonic Stem Cell Pluripotency	1.8	0.0158489	PIK3C2B,RAF1,JAK1,MAPK1,SOS2,PIK3R5,KRAS,STAT3,MAPK13,MAPK12,TCF3,ID3,APC,MAPK14,PIK3C3,PIK3R6,LEF1,DVL3,GSK3B,CTNNB1,TAB1
SAPK/JNK Signaling	1.8	0.0158489	MAP2K4,PIK3C2B,SOS2,MAP3K1,RAC1,PIK3R5,KRAS,MAPK12,FADD,TRADD,SHC1,GAB1,PIK3C3,ZAK,MAPK10,PIK3R6,FCER1G,MAP4K4,TAB1,MAP3K2
ILK Signaling	1.8	0.0158489	MAP2K6,MAP2K4,MAPK1,PPP2R2A,PPP2CA,ACTA2,PIK3R5,RICTOR,PTEN,RHOG,FLNA,PIK3C3,CREB1,ILKAP,GSK3B,CTNNB1,RHOF,MYL3,PIK3C2B,CFL1,RHOC,TNFRSF1A,PPP2R5D,VIM,MAPK12,CREB5,PPP2R5A,DOCK1,MAPK10,PIK3R6,MYH3,LEF1,PTGS2,MMP9
Type I Diabetes Mellitus Signaling	1.8	0.0158489	MAP2K6,MAP2K4,SOCS3,JAK1,MAPK1,TNFRSF1A,MYD88,APAF1,IFNGR1,MAPK13,IL1R1,MAPK12,BCL2,IRAK1,TRAF6,FADD,TRADD,MAPK14,CASP9,MAPK10,FCER1G,CASP8
Endometrial Cancer Signaling	1.78	0.0165959	RAF1,PIK3C2B,MAPK1,SOS2,PIK3R5,KRAS,PTEN,CASP9,PIK3C3,FOXO3,PIK3R6,LEF1,GSK3B,CTNNB1
IL-17A Signaling in Airway Cells	1.76	0.017378	MAP2K4,PIK3C2B,JAK1,MAPK1,PIK3R5,STAT3,MAPK13,IL17RA,MAPK12,PTEN,TRAF6,MAPK14,PIK3C3,MAPK10,PIK3R6,GSK3B
IL-2 Signaling	1.72	0.0190546	RAF1,PIK3C2B,STAT5A,JAK1,PTK2B,MAPK1,SOS2,PIK3R5,KRAS,SHC1,CSNK2A2,PIK3C3,PIK3R6,STAT5B
Non-Small Cell Lung Cancer Signaling	1.72	0.0190546	RAF1,PIK3C2B,MAPK1,TFDP1,SOS2,ABL1,PIK3R5,PLCG1,KRAS,STK4,CASP9,PIK3C3,FOXO3,ITPR3,TGFA,PIK3R6
Telomerase Signaling	1.72	0.0190546	RAF1,PIK3C2B,HDAC4,HDAC8,MAPK1,PPP2CA,PPP2R2A,PPP2R5D,SOS2,ABL1,PIK3R5,HDAC10,KRAS,PPP2R5A,SHC1,ELF4,ELF2,SP1,PIK3C3,PIK3R6,TPP1
PPARα/RXRα Activation	1.68	0.020893	MAP2K6,MAP2K4,PPARA,RAF1,MED23,MAPK1,ADCY4,SOS2,CYP2C9,KRAS,GK,ABCA1,SHC1,GPD2,STAT5B,SMAD2,ACOX1,GNAQ,PLCG1,IL1R1,TGS1,NCOA3,IL18RAP,AIP,TRAF6,MAPK14,ADCY1,IL1RAPL1,ADIPOR2,MAP4K4,PRKAR1A
IL-17 Signaling	1.68	0.020893	MAP2K4,MAP2K6,PIK3C2B,JAK1,MAPK1,PIK3R5,KRAS,MAPK13,IL17RA,MAPK12,TRAF6,MAPK14,PIK3C3,MAPK10,PIK3R6,PTGS2,GSK3B
ErbB Signaling	1.66	0.0218776	MAP2K6,MAP2K4,PIK3C2B,RAF1,PAK2,MAPK1,SOS2,PIK3R5,PLCG1,KRAS,MAPK13,MAPK12,SHC1,MAPK14,PIK3C3,MAPK10,TGFA,PIK3R6,GSK3B
p38 MAPK Signaling	1.66	0.0218776	MAP2K4,MAP2K6,DDIT3,TNFRSF1A,MEF2A,IRAK3,MAPK13,IL1R1,CREB5,MAPK12,IRAK1,IL18RAP,TRAF6,FADD,TRADD,H3F3A/H3F3B,MAPK14,IL1RN,DUSP1,CREB1,MKNK1,IL1RAPL1,TAB1
JAK/Stat Signaling	1.66	0.0218776	STAT5A,RAF1,SOCS3,PIK3C2B,JAK1,MAPK1,SOS2,GNAQ,PIK3R5,KRAS,STAT3,SHC1,PIK3C3,CISH,PIK3R6,STAT5B
Colorectal Cancer Metastasis Signaling	1.66	0.0218776	MAP2K4,JAK1,MAPK1,ADCY4,SOS2,PIK3R5,TLR8,KRAS,BRAF,GNB4,RHOG,ARRB1,CASP9,PIK3C3,GSK3B,CTNNB1,RHOF,RALGDS,MMP19,PIK3C2B,SMAD2,RHOC,TNFRSF1A,RAC1,IFNGR1,STAT3,TCF3,MAPK12,BIRC5,APC,TLR2,TLR4,TLR5,ADCY1,MAPK10,PIK3R6,LEF1,PTGS2,MMP9,PRKAR1A
GM-CSF Signaling	1.66	0.0218776	RAF1,PIK3C2B,MAPK1,SOS2,PIK3R5,KRAS,PPP3CC,STAT3,SHC1,PPP3R1,PIK3C3,CISH,PIK3R6,STAT5B,BCL2A1
FAK Signaling	1.66	0.0218776	PIK3C2B,RAF1,ARHGAP26,PAK2,MAPK1,ASAP1,ACTA2,SOS2,PIK3R5,RAC1,PLCG1,KRAS,PTEN,GIT2,DOCK1,WAS,PIK3C3,PIK3R6,CAPN10
RANK Signaling in Osteoclasts	1.66	0.0218776	MAP2K6,MAP2K4,PIK3C2B,RAF1,PTK2B,MAPK1,MAP3K1,PIK3R5,PPP3CC,MAPK13,MAPK12,TRAF6,MAPK14,CBL,PIK3C3,PPP3R1,MAPK10,PIK3R6,MAP3K2
Prostate Cancer Signaling	1.66	0.0218776	RAF1,PIK3C2B,MAPK1,TFDP1,SOS2,ABL1,PIK3R5,KRAS,CREB5,PTEN,BCL2,CASP9,PIK3C3,CREB1,PIK3R6,LEF1,GSK3B,CTNNB1
Role of NFAT in Cardiac Hypertrophy	1.66	0.0218776	MAP2K6,MAP2K4,RAF1,MAPK1,ADCY4,SOS2,PIK3R5,CSNK1A1,HDAC10,KRAS,MAPK13,SHC1,GNB4,PPP3R1,PIK3C3,GSK3B,PIK3C2B,HDAC4,HDAC8,MAP3K1,GNAQ,MEF2A,PLCG1,PPP3CC,MAPK12,MAPK14,ADCY1,ITPR3,PIK3R6,MAPK10,SLC8A1,PRKAR1A
NGF Signaling	1.66	0.0218776	MAP2K4,PIK3C2B,RAF1,MAPK1,MAP3K1,SOS2,PIK3R5,RAC1,PLCG1,KRAS,CREB5,MAPK12,RAP1A,TRAF6,SHC1,RHOG,GAB1,PIK3C3,CREB1,MAPK10,PIK3R6,MAP3K2
CD40 Signaling	1.65	0.0223872	MAP2K4,MAP2K6,PIK3C2B,MAPK1,PIK3R5,STAT3,MAPK13,MAPK12,TRAF6,MAPK14,CD40,PIK3C3,MAPK10,PIK3R6,TRAF1
Acute Myeloid Leukemia Signaling	1.62	0.0239883	MAP2K4,MAP2K6,STAT5A,RAF1,PIK3C2B,MAPK1,SOS2,PIK3R5,KRAS,STAT3,TCF3,FLT3LG,BRAF,PIK3C3,PIK3R6,LEF1,STAT5B
IL-9 Signaling	1.62	0.0239883	SOCS3,PIK3C2B,STAT5A,JAK1,PIK3C3,CISH,PIK3R6,PIK3R5,STAT3,STAT5B
Oncostatin M Signaling	1.62	0.0239883	MT2A,SHC1,RAF1,STAT5A,JAK1,MAPK1,OSM,KRAS,STAT3,STAT5B
PAK Signaling	1.62	0.0239883	MAP2K4,PIK3C2B,RAF1,PAK2,PTK2B,CFL1,MAPK1,SOS2,RAC1,PIK3R5,LIMK2,KRAS,MAPK12,SHC1,PIK3C3,MAPK10,PIK3R6,EPHB3,MYL3
ErbB4 Signaling	1.54	0.0288403	RAF1,PIK3C2B,ADAM17,MAPK1,APH1B,SOS2,PIK3R5,PLCG1,PSENEN,KRAS,SHC1,PIK3C3,PIK3R6,PSEN1
PDGF Signaling	1.53	0.0295121	MAP2K4,PIK3C2B,RAF1,JAK1,MAPK1,SOS2,MAP3K1,ABL1,PIK3R5,PLCG1,KRAS,STAT3,SHC1,CSNK2A2,SPHK2,PIK3C3,PIK3R6
Role of Pattern Recognition Receptors in Recognition of Bacteria and Viruses	1.53	0.0295121	MAP2K4,PIK3C2B,MAPK1,MYD88,IL10,PIK3R5,TLR8,MAPK12,RNASEL,TRAF6,TLR2,TLR4,CLEC7A,TLR5,PIK3C3,CREB1,MAPK10,CASP1,PIK3R6
IL-3 Signaling	1.52	0.0301995	STAT5A,GAB2,RAF1,PIK3C2B,JAK1,MAPK1,RAC1,PIK3R5,KRAS,PPP3CC,STAT3,SHC1,PIK3C3,PPP3R1,PIK3R6,STAT5B
Role of p14/p19ARF in Tumor Suppression	1.51	0.030903	PIK3C2B,PIK3C3,SF3A2,PIK3R6,SENP3,RAC1,PIK3R5,SF3A1,UBTF
Germ Cell-Sertoli Cell Junction Signaling	1.51	0.030903	MAP2K6,EPN3,MAP2K4,MAPK1,ACTA2,PIK3R5,LIMK2,KRAS,TUBB,IQGAP1,AGGF1,RHOG,PIK3C3,CTNNB1,RHOF,RAB8B,MAP3K2,PIK3C2B,PAK2,RHOC,TJP1,TNFRSF1A,MAP3K1,RAC1,MAPK12,MAPK14,PIK3R6,MAPK10
Role of Macrophages, Fibroblasts and Endothelial Cells in Rheumatoid Arthritis	1.51	0.030903	MAP2K4,MAP2K6,SOCS3,RAF1,MAPK1,PIK3R5,TLR8,CEBPD,CSNK1A1,LTB,KRAS,IL17RA,IRAK1,TRADD,NFAT5,PPP3R1,PIK3C3,CREB1,OSM,GSK3B,CTNNB1,TRAF1,PIK3C2B,MYD88,TNFRSF1A,IL10,RAC1,GNAQ,PLCG1,PPP3CC,STAT3,IL1R1,IRAK3,TCF3,CREB5,APC,IL18RAP,TLR2,TRAF6,TLR4,MAPK14,TLR5,IL1RN,PIK3R6,LEF1,IL1RAPL1
IL-1 Signaling	1.51	0.030903	MAP2K4,MAP2K6,MAPK1,MYD88,ADCY4,MAP3K1,GNAQ,IRAK3,MAPK13,IL1R1,MAPK12,IRAK1,TRAF6,GNB4,MAPK14,ADCY1,MAPK10,TAB1,PRKAR1A
Regulation of the Epithelial-Mesenchymal Transition Pathway	1.5	0.0316228	MAP2K6,MAP2K4,RAF1,ADAM17,JAK1,APH1B,MAPK1,SOS2,PIK3R5,KRAS,PSENEN,BRAF,PIK3C3,HGF,GSK3B,SMAD2,PIK3C2B,JAG2,FGF9,STAT3,TCF3,APC,PYGO2,GAB1,PIK3R6,RBPJ,DVL3,LEF1,JAG1,MMP9,PSEN1
Phospholipase C Signaling	1.49	0.0323594	RAF1,MPRIP,MAPK1,ADCY4,SOS2,HDAC10,KRAS,SHC1,GNB4,RHOG,NFAT5,PPP3R1,CREB1,MARCKS,RHOF,MYL3,RALGDS,HDAC4,PLD3,HDAC8,CD79B,RHOC,FCGR2A,MEF2A,GNAQ,RAC1,PLCG1,ARHGEF17,PPP3CC,CREB5,RAP1A,PLD4,ADCY1,ITPR3,FCER1G,ARHGEF9,LCP2
Role of JAK1 and JAK3 in γc Cytokine Signaling	1.48	0.0331131	SOCS3,PIK3C2B,STAT5A,IL4R,JAK1,PTK2B,MAPK1,PIK3R5,KRAS,STAT3,SHC1,PIK3C3,PIK3R6,STAT5B
Ceramide Signaling	1.48	0.0331131	MAP2K4,RAF1,PIK3C2B,TNFRSF1A,PPP2CA,PPP2R2A,PPP2R5D,MAP3K1,PIK3R5,KRAS,PPP2R5A,BCL2,S1PR3,SPHK2,PIK3C3,PIK3R6,NSMAF
Role of IL-17A in Arthritis	1.48	0.0331131	MAP2K4,MAP2K6,PIK3C2B,MAPK1,PIK3R5,MAPK13,MAPK12,IL17RA,MAPK14,PIK3C3,PIK3R6,MAPK10,PTGS2
LPS-stimulated MAPK Signaling	1.47	0.0338844	MAP2K6,MAP2K4,PIK3C2B,RAF1,MAPK1,RAC1,PIK3R5,KRAS,MAPK13,MAPK12,TLR4,MAPK14,PIK3C3,CREB1,MAPK10,PIK3R6
Prolactin Signaling	1.47	0.0338844	STAT5A,RAF1,SOCS3,PIK3C2B,MAPK1,SOS2,PIK3R5,PLCG1,KRAS,STAT3,NR3C1,SHC1,SP1,PIK3C3,PIK3R6,STAT5B
Cdc42 Signaling	1.46	0.0346737	MAP2K4,ACTR2,RAF1,MPRIP,PAK2,CFL1,MAPK1,ARPC5L,LIMK2,MAPK13,TNK2,EXOC6,MAPK12,IQGAP1,APC,MAPK14,WAS,ARPC2,MAPK10,FCER1G,CDC42SE1,GSK3B,MYL3
Neurotrophin/TRK Signaling	1.46	0.0346737	MAP2K4,MAP2K6,RAF1,PIK3C2B,MAPK1,SOS2,PIK3R5,PLCG1,KRAS,CREB5,SHC1,GAB1,PIK3C3,CREB1,PIK3R6
Granzyme B Signaling	1.46	0.0346737	PRKDC,CASP9,NUMA1,APAF1,CASP8,LMNB1
CD28 Signaling in T Helper Cells	1.45	0.0354813	MAP2K4,ACTR2,PIK3C2B,ARPC5L,MAP3K1,RAC1,PIK3R5,PLCG1,PPP3CC,MAPK12,NFAT5,WAS,CARD11,PIK3C3,ARPC2,PPP3R1,ITPR3,MAPK10,PIK3R6,FCER1G,LCP2
Thrombopoietin Signaling	1.45	0.0354813	GAB2,RAF1,PIK3C2B,STAT5A,MAPK1,PIK3R5,PLCG1,KRAS,STAT3,SHC1,PIK3C3,PIK3R6,STAT5B
Role of Osteoblasts, Osteoclasts and Chondrocytes in Rheumatoid Arthritis	1.45	0.0354813	MAP2K6,MAP2K4,ADAM17,MAPK1,PTK2B,PIK3R5,CSNK1A1,ACP5,BCL2,TRADD,NFAT5,CASP9,PPP3R1,PIK3C3,GSK3B,CTNNB1,BMP8B,BMP1,PIK3C2B,TNFRSF1A,IL10,IL1R1,PPP3CC,MAPK12,TCF3,NAIP,APC,IL18RAP,TRAF6,MAPK14,CBL,IL1RN,MAPK10,PIK3R6,LEF1,IL1RAPL1
T Cell Receptor Signaling	1.44	0.0363078	MAP2K4,PIK3C2B,RAF1,MAPK1,SOS2,MAP3K1,RAC1,PIK3R5,PLCG1,KRAS,PPP3CC,CBL,NFAT5,CARD11,PIK3C3,PAG1,PPP3R1,PIK3R6,LCP2
NF-κB Signaling	1.42	0.0380189	MAP2K6,AZI2,PIK3R5,TLR8,KRAS,IRAK1,PIK3C3,GSK3B,CASP8,TAB1,PIK3C2B,TNFRSF1A,MYD88,IL1R1,IRAK3,IGF2R,TLR2,TRAF6,TLR4,CSNK2A2,TLR5,CD40,IL1RN,CARD11,PIK3R6,TGFA,FCER1G,MAP4K4
April Mediated Signaling	1.41	0.0389045	MAP2K4,TRAF6,NFAT5,MAPK14,MAPK1,MAP3K1,MAPK10,MAPK13,MAPK12,TRAF1
Amyloid Processing	1.4	0.0398107	CSNK2A2,MAPK14,APH1B,MAPK1,CSNK1A1,PSENEN,MAPK13,GSK3B,MAPK12,CAPN10,PSEN1,PRKAR1A
Rac Signaling	1.35	0.0446684	MAP2K4,ACTR2,PIK3C2B,RAF1,TIAM1,PAK2,PTK2B,CFL1,MAPK1,ARPC5L,MAP3K1,RAC1,PIK3R5,KRAS,LIMK2,IQGAP1,PIK3C3,ARPC2,CD44,PIK3R6
Docosahexaenoic Acid (DHA) Signaling	1.34	0.0457088	ALOX15,PIK3C2B,CASP9,PIK3C3,PIK3R6,APAF1,PIK3R5,GSK3B,BCL2A1,BCL2
Dendritic Cell Maturation	1.34	0.0457088	MAP2K4,MAPK1,PIK3R5,LTB,MAPK13,PIK3C3,CREB1,IL23A,FCGR1B,TAB1,PIK3C2B,MYD88,IL10,FCGR2A,TNFRSF1A,PLCG1,MAPK12,CREB5,TLR2,TRAF6,TLR4,MAPK14,CD40,IL1RN,PIK3R6,MAPK10,FCER1G,IFNAR1
PPAR Signaling	1.34	0.0457088	PPARA,STAT5A,RAF1,MAPK1,TNFRSF1A,SOS2,KRAS,IL1R1,IL18RAP,AIP,TRAF6,SHC1,IL1RN,PTGS2,IL1RAPL1,STAT5B,MAP4K4,TAB1
IL-8 Signaling	1.34	0.0457088	MAP2K4,RAF1,MAPK1,PTK2B,PIK3R5,LIMK2,KRAS,CXCR1,IQGAP1,IRAK1,BCL2,BRAF,GNB4,RHOG,PIK3C3,RHOF,VASP,PIK3C2B,PAK2,PLD3,RHOC,RAC1,IRAK3,MAPK12,TRAF6,PLD4,PIK3R6,MAPK10,PTGS2,MAP4K4,MMP9
NRF2-mediated Oxidative Stress Response	1.34	0.0457088	MAP2K6,AKR7A2,MAP2K4,RAF1,AKR7A3,DNAJC17,MAPK1,NQO2,ACTA2,PIK3R5,DNAJC3,KRAS,DNAJC15,MAFG,CUL3,PIK3C3,PMF1,UBE2K,DNAJA2,TXN,GSK3B,NFE2L2,CBR1,PIK3C2B,DNAJB12,MAP3K1,MAPK14,ERP29,PIK3R6,FTH1
Estrogen Receptor Signaling	1.33	0.0467735	MED13,POLR2J2/POLR2J3,PRKDC,RAF1,PELP1,MED23,MAPK1,SOS2,GTF2F1,HNRNPD,KRAS,TAF10,NR3C1,NCOA3,SMARCA4,SHC1,TAF6L,H3F3A/H3F3B,THRAP3,NCOA2,POLR2E,MED31,GTF2H5
Retinoic acid Mediated Apoptosis Signaling	1.32	0.047863	PARP10,ZC3HAV1,APAF1,RARG,IFNA6,FADD,CASP9,PARP15,PARP11,TNFRSF10C,CFLAR,CASP8,IFNAR1
Mitochondrial Dysfunction	1.32	0.047863	MAP2K4,COX7B,APH1B,TRAK1,PSENEN,NDUFA1,ATP5E,CASP9,GPD2,CYB5R3,NDUFS6,CASP8,NDUFS4,NDUFB4,NDUFB3,COX17,COX7B2,SDHC,MAPK12,VPS9D1,ATP5B,MAPK10,NDUFA3,COX5B,UQCRQ,PSEN1
5h_Male_CanonicalPathways
None significant at B-H p<0.05
24h_Female_CanonicalPathways
Ingenuity Canonical Pathways	-log(B-H p-value)	B-H p-value	Molecules
B Cell Receptor Signaling	3.61	0.000245471	MAP2K4,RAF1,GAB2,MAPK1,SOS2,KRAS,MAPK13,BCL6,PTEN,PTPRC,IKBKB,PPP3R1,PIK3CG,GSK3B,MAP3K2,RPS6KB1,RAC1,CREB5,TCF3,ATF2,GAB1,INPP5F,PTPN11,SYK,BCL2A1,CAMK2G,MAP2K6,PIK3CA,POU2F2,PIK3R5,MAP3K5,CDC42,FCGR2B,NFAT5,PPP3CB,PIK3C3,CREB1,SOS1,PPP3CA,NRAS,PIK3C2A,CD79B,FCGR2A,MAP3K1,CALM1 (includes others),MAPK14,SYNJ1,DAPP1,BCL10,PAG1,VAV3,NFATC2,MAP3K8,PRKCB
Toll-like Receptor Signaling	3.14	0.000724436	MAP2K6,MAP2K4,PPARA,MAPK1,TAB2,TLR8,MAPK13,IKBKB,TLR10,TLR1,MYD88,MAP3K1,IRAK3,TLR9,TLR2,TRAF6,TLR4,FOS,LY96,MAPK14,TLR5,TLR6,EIF2AK2,TIRAP,MAP4K4
NF-κB Signaling	2.77	0.00169824	TGFBR1,TAB2,TLR8,KRAS,TGFBR2,IL1R2,IKBKB,TLR10,PIK3CG,TLR1,TDP2,GSK3B,TNFSF13B,HDAC2,TBK1,TLR9,TAB3,TRAF6,TLR2,CARD11,IL1RN,MAP2K6,AZI2,PIK3CA,UBE2N,PIK3R5,TANK,PIK3C3,PDGFRA,IGF1R,NRAS,PIK3C2A,MYD88,TNFRSF1A,FLT1,RELB,IL1R1,IRAK3,IGF2R,TLR4,TLR5,BCL10,TLR6,TGFA,FCER1G,MAP3K8,EIF2AK2,TIRAP,KDR,MAP4K4,PRKCB
EIF2 Signaling	2.39	0.0040738	RAF1,RPL27A,MAPK1,SOS2,KRAS,RPS23,RPS7,EIF3B,PIK3CG,EIF5,GSK3B,AGO1,EIF2AK1,RPL36A/RPL36A-HNRNPH2,RPL7L1,RPL10A,RPS6,RPS29,RPL39,RPL26L1,RPL10,RPS15,RPS15A,PPP1CC,PIK3CA,RPL22L1,PIK3R5,RPS21,EIF2S1,RPL35A,EIF2B2,RPL7,EIF4E,RPS27,PIK3C3,SOS1,EIF2S3,RPL31,RPL13,RPS24,NRAS,PIK3C2A,RPL34,RPS28,RPL17,RPL23,RPS27L,RPS26,AGO3,EIF2AK2,RPL38,AGO4
Fcγ Receptor-mediated Phagocytosis in Macrophages and Monocytes	2.39	0.0040738	GAB2,MAPK1,PTK2B,ARPC5,ACTA2,TLN1,CRK,NCK1,CDC42,FCGR1A,PTEN,ACTR3,EZR,PIK3CG,PRKCE,VASP,FGR,ACTR2,RPS6KB1,FCGR2A,RAC1,FYB,ACTG1,PLD1,PLD4,PRKCI,CBL,VAV3,SYK,ARPC2,RAB11A,LCP2,PRKCB
Protein Ubiquitination Pathway	2.2	0.00630957	PSMA3,UBE2A,PSMA7,UBE2D2,DNAJC3,DNAJC15,SKP1,TCEB1,USP48,USP7,USP8,UBE2B,DNAJC8,UCHL5,PSMC2,PSMA2,BRCA1,PSMA6,PSMB5,UBE4B,USP38,USP36,USP9X,PSMD5,PSMD6,PSMD3,UBE2S,TRAF6,PSMB7,CBL,USP32,UBE2G1,RBX1,PSMA5,PSMD12,PSMA4,DNAJC14,HSPA13,PSMB1,PSMD1,UBE2J2,UBE2C,B2M,USP35,HLA-A,UBE2N,PSMD9,HSPA6,DNAJC13,DNAJA1,ANAPC1,UBE2F,USP3,PSMD10,PSMC6,HSPA4L,USP15,UBE2R2,MDM2,UBE2D1,PSMC1,UBE2J1,USP4,HLA-C,USP37,…
IGF-1 Signaling	2.12	0.00758578	SOCS3,RAF1,PIK3CA,JAK1,MAPK1,SOS2,PIK3R5,KRAS,JAK2,YWHAQ,CASP9,PIK3C3,PIK3CG,FOXO3,SOS1,IGF1R,PRKAR1B,IRS2,RASA1,RPS6KB1,NRAS,PIK3C2A,YWHAB,YWHAZ,PRKAR2A,STAT3,GRB10,FOS,PRKCI,PTPN11,PRKAG2,SFN,PRKAR1A
T Cell Receptor Signaling	2	0.01	MAP2K4,RAF1,PIK3CA,MAPK1,SOS2,PIK3R5,KRAS,PTPRC,IKBKB,NFAT5,PPP3CB,PIK3CG,PPP3R1,PIK3C3,SOS1,RASA1,PPP3CA,NRAS,PIK3C2A,MAP3K1,RAC1,BMX,FOS,CALM1 (includes others),CBL,CARD11,GRAP2,BCL10,PAG1,VAV3,NFATC2,LCP2
PI3K/AKT Signaling	2	0.01	RAF1,GAB2,PIK3CA,JAK1,MAPK1,PPP2R2A,PPP2CA,SOS2,ILK,KRAS,JAK2,MAP3K5,EIF4E,PTEN,YWHAQ,IKBKB,PIK3CG,FOXO3,SOS1,PPP2R5C,GSK3B,CTNNB1,MCL1,RPS6KB1,NRAS,YWHAB,YWHAZ,MDM2,PPP2R5A,NANOG,SYNJ1,INPP5F,GAB1,MAP3K8,PTGS2,PPP2R5E,SFN,JAK3
HGF Signaling	2	0.01	MAP2K4,RAF1,PIK3CA,MAPK1,SOS2,PIK3R5,KRAS,MAP3K5,CDC42,ELF4,ETS2,PIK3CG,HGF,PIK3C3,SOS1,PRKCE,MAP3K2,NRAS,PIK3C2A,MAP3K1,RAC1,STAT3,RAP1A,ATF2,MET,FOS,ELF2,PRKCI,PTPN11,GAB1,MAP3K8,PTGS2,PRKCB
Renal Cell Carcinoma Signaling	2	0.01	RAF1,PIK3CA,MAPK1,SOS2,PIK3R5,CRK,KRAS,CDC42,TCEB1,HGF,PIK3C3,PIK3CG,SOS1,PAK2,NRAS,PIK3C2A,RAC1,RAP1A,MET,FOS,PTPN11,GAB1,PAK3,RBX1,TGFA
GM-CSF Signaling	1.98	0.0104713	RAF1,PIK3CA,NRAS,PIK3C2A,MAPK1,SOS2,PIK3R5,KRAS,JAK2,STAT3,CSF2RB,PTPN11,PPP3CB,CSF2RA,PIK3C3,PIK3CG,PPP3R1,SOS1,STAT5B,BCL2A1,PPP3CA,CAMK2G,PRKCB
HMGB1 Signaling	1.93	0.011749	MAP2K6,MAP2K4,PIK3CA,MAPK1,PIK3R5,KRAS,MAPK13,CDC42,RHOG,HMGB1,SP1,RHOT1,PIK3CG,PIK3C3,RHOF,NRAS,PIK3C2A,RHOC,TNFRSF1A,HAT1,RAC1,IFNGR2,IFNGR1,IL1R1,TLR4,FOS,MAPK14,RND3,KAT6A,RHOA,FNBP1
ERK/MAPK Signaling	1.93	0.011749	RAF1,MAPK1,PPP2CA,SOS2,KRAS,TLN1,YWHAQ,ETS2,PIK3CG,YWHAB,RAC1,YWHAZ,STAT3,CREB5,RAP1A,ATF2,H3F3A/H3F3B,DUSP1,PPP1R12A,PPP1CC,PIK3CA,PTK2B,PPP2R2A,PIK3R5,CRK,EIF4E,ELF4,LAMTOR3,PIK3C3,CREB1,MKNK1,SOS1,PRKAR1B,PRKCE,PPP2R5C,PPARG,MYCN,NRAS,PAK2,PIK3C2A,PRKAR2A,PPP2R5A,PLA2G4A,FOS,ELF2,PPP1R3D,PRKCI,PAK3,PRKAG2,PPP2R5E,PRKCB,PRKAR1A
Thrombopoietin Signaling	1.93	0.011749	GAB2,RAF1,THPO,PIK3CA,NRAS,PIK3C2A,MAPK1,PIK3R5,KRAS,JAK2,STAT3,FOS,PRKCI,PTPN11,PIK3C3,PIK3CG,SOS1,PRKCE,IRS2,STAT5B,PRKCB
Role of Pattern Recognition Receptors in Recognition of Bacteria and Viruses	1.93	0.011749	MAP2K4,PIK3CA,MAPK1,PIK3R5,TLR8,C1QC,EIF2S1,RNASEL,PIK3C3,PIK3CG,TLR1,CREB1,CASP1,PRKCE,NLRC4,PIK3C2A,MYD88,C5,TLR9,TLR2,TRAF6,TLR4,CLEC7A,PRKCI,TLR5,SYK,TLR6,EIF2AK2,C3AR1,PRKCB
Insulin Receptor Signaling	1.93	0.011749	SOCS3,RAF1,PPP1CC,PIK3CA,JAK1,MAPK1,SGK1,SOS2,PIK3R5,KRAS,CRK,NCK1,JAK2,EIF2B2,EIF4E,PTEN,PIK3CG,PIK3C3,FOXO3,SOS1,PRKAR1B,IRS2,STX4,GSK3B,RPS6KB1,NRAS,PIK3C2A,PRKAR2A,GRB10,PPP1R3D,PRKCI,CBL,SYNJ1,PTPN11,INPP5F,GAB1,PRKAG2,PPP1R12A,PRKAR1A
IL-3 Signaling	1.92	0.0120226	GAB2,RAF1,PIK3CA,JAK1,MAPK1,PIK3R5,KRAS,JAK2,PPP3CB,PPP3R1,PIK3C3,PIK3CG,SOS1,PRKCE,STAT5B,PPP3CA,STAT6,NRAS,PIK3C2A,RAC1,STAT3,CSF2RB,FOS,PRKCI,PRKCB
FLT3 Signaling in Hematopoietic Progenitor Cells	1.92	0.0120226	GAB2,RAF1,PIK3CA,MAPK1,SOS2,RPS6KA3,PIK3R5,KRAS,MAPK13,EIF4E,PIK3C3,PIK3CG,CREB1,SOS1,STAT5B,RPS6KB1,STAT6,NRAS,PIK3C2A,STAT3,CREB5,ATF2,MAPK14,CBL,PTPN11
Integrin Signaling	1.92	0.0120226	RAP2B,MAP2K4,RAF1,ARHGAP26,MAPK1,ARPC5,SOS2,TLN1,KRAS,NCK1,PTEN,ITGAE,TSPAN3,RHOG,ARF4,PIK3CG,GSK3B,CAPN5,ACTR2,RAC1,TSPAN2,RAP1A,MYL12A,ITGAM,RND3,RHOA,ARPC2,PPP1R12A,CTTN,ITGA7,FNBP1,PIK3CA,RALA,ACTA2,MYLK3,PIK3R5,ILK,CRK,CDC42,ACTR3,WASL,RHOT1,PIK3C3,SOS1,RHOF,VASP,PAK2,NRAS,PIK3C2A,ASAP1,RHOC,ACTG1,ARF1,PAK3
Actin Nucleation by ARP-WASP Complex	1.92	0.0120226	ACTR2,NRAS,RHOC,SOS2,ARPC5,RAC1,KRAS,NCK1,CDC42,ACTR3,WASL,RHOG,RND3,RHOT1,ARPC2,RHOA,SOS1,PPP1R12A,RHOF,FNBP1,VASP
Mitochondrial Dysfunction	1.83	0.0147911	MAP2K4,NDUFA4,COX7B,NDUFA9,APH1B,UQCR11,TRAK1,COX7A2L,NDUFA1,ATP5E,MAOB,CASP9,GPD2,NDUFS6,NDUFB6,ATPAF1,HTRA2,COX4I1,ATP5J,COX17,NDUFB3,NDUFB4,COX7A2,COX7B2,NDUFS7,ATP5A1,SURF1,LRRK2,NDUFB1,SDHC,COX7C,VPS9D1,ATP5C1,NDUFB11,NDUFV2,ATP5B,NDUFA6,UQCRC2,COX5B,UQCRQ,COX15,PSEN1,COX6C
Regulation of eIF4 and p70S6K Signaling	1.8	0.0158489	RAF1,PIK3CA,MAPK1,PPP2CA,PPP2R2A,SOS2,PIK3R5,KRAS,RPS21,MAPK13,PAIP2,EIF2S1,RPS23,EIF2B2,EIF4E,RPS7,RPS27,EIF3B,PIK3CG,PIK3C3,SOS1,MKNK1,EIF2S3,PPP2R5C,AGO1,RPS24,RPS6KB1,NRAS,PIK3C2A,RPS28,RPS27L,PPP2R5A,RPS29,RPS6,MAPK14,RPS26,AGO3,RPS15,RPS15A,PPP2R5E,AGO4
Molecular Mechanisms of Cancer	1.77	0.0169824	RAP2B,MAP2K4,GAB2,RAF1,TGFBR1,JAK1,MAPK1,APH1B,ADCY4,SOS2,TAB2,KRAS,MAPK13,TGFBR2,RHOG,CASP9,PIK3CG,GSK3B,BRCA1,RASA1,SMAD2,TFDP1,RAC1,ARHGEF17,GNAZ,TCF3,RAP1A,APC,CBL,GAB1,RND3,PTPN11,RABIF,RHOA,FZD5,CFLAR,FNBP1,CAMK2G,MAP2K6,PIK3CA,RALA,PA2G4,PIK3R5,CTNNA1,CRK,JAK2,MAP3K5,CDC42,E2F3,FAS,LAMTOR3,RHOT1,PIK3C3,SOS1,PRKAR1B,PRKCE,RHOF,CTNNB1,PRKDC,NRAS,PAK2,ARHGEF12,PIK3C2A,HAT1,RHOC,APAF1,PRKAR2A,…
iNOS Signaling	1.77	0.0169824	JAK1,MAPK1,MYD88,IFNGR2,IFNGR1,IRAK3,HMGA1,MAPK13,JAK2,TRAF6,CALM1 (includes others),FOS,TLR4,IKBKB,LY96,MAPK14,JAK3
Tec Kinase Signaling	1.77	0.0169824	MAP2K4,PIK3CA,JAK1,PTK2B,GTF2I,ACTA2,PIK3R5,TNFSF10,JAK2,FAS,GNB1,GNB4,RHOG,RHOT1,PIK3CG,PIK3C3,PRKCE,STAT5B,RHOF,FGR,STAT6,PAK2,PIK3C2A,RHOC,GNAQ,BMX,STAT3,GNAZ,ACTG1,GNG10,GNAI3,TLR4,FOS,PRKCI,RND3,PAK3,VAV3,RHOA,TNFRSF25,FCER1G,JAK3,FNBP1,PRKCB
Hypoxia Signaling in the Cardiovascular System	1.67	0.0213796	UBE2A,UBE2N,COPS5,UBE2D2,UBE2R2,MDM2,UBE2S,CREB5,UBE2D1,ATF2,UBE2F,PTEN,UBE2J1,UBE2B,SUMO1,UBE2G1,CREB1,HIF1AN,LDHA,UBE2D3,UBE2C,UBE2J2
Renin-Angiotensin Signaling	1.67	0.0213796	MAP2K4,RAF1,PIK3CA,MAPK1,PTK2B,ADCY4,SOS2,PIK3R5,KRAS,JAK2,MAPK13,PIK3C3,PIK3CG,SOS1,PRKAR1B,PRKCE,PAK2,NRAS,PIK3C2A,MAP3K1,GNAQ,RAC1,PRKAR2A,STAT3,ATF2,FOS,MAPK14,PRKCI,PAK3,ITPR3,PRKAG2,PRKCB,PRKAR1A
Glucocorticoid Receptor Signaling	1.62	0.0239883	MAP2K4,RAF1,JAK1,TGFBR1,MAPK1,PRKAB2,SGK1,SOS2,SLPI,KRAS,MAPK13,TAF10,CD163,FCGR1A,IL1R2,TGFBR2,IKBKB,HMGB1,SUMO1,PIK3CG,PPP3R1,PRKAA1,SMAD2,MED1,RAC1,STAT3,MED14,NCOA3,TRAF6,TAF5,DUSP1,IL1RN,POLR2E,PIK3CA,POU2F2,HSPA6,PIK3R5,JAK2,NR3C1,SMARCA4,NFAT5,PPP3CB,NCOA2,ANXA1,PIK3C3,FOXO3,CREB1,SOS1,NCOR1,TAF3,FKBP5,STAT5B,PPP3CA,ADRB2,CCNH,NRAS,PIK3C2A,MAP3K1,CEBPB,TSG101,FOS,MAPK14,PRKAG2,NFATC2,PTGS2…
Role of JAK1 and JAK3 in γc Cytokine Signaling	1.62	0.0239883	STAT6,SOCS3,IL4R,PIK3CA,JAK1,NRAS,PIK3C2A,PTK2B,MAPK1,FES,PIK3R5,KRAS,STAT3,JAK2,PTPN11,PIK3C3,SYK,PIK3CG,IRS2,STAT5B,JAK3
IL-10 Signaling	1.62	0.0239883	CCR1,MAP2K6,MAP2K4,SOCS3,IL4R,JAK1,MAPK1,FCGR2A,STAT3,MAPK13,IL1R1,FCGR2B,IL18RAP,IL1R2,TRAF6,IKBKB,FOS,MAPK14,SP1,IL1RN,IL1RAPL1,IL1RAP,MAP4K4
PI3K Signaling in B Lymphocytes	1.61	0.0245471	RAF1,PIK3CA,MAPK1,ATF5,ATF6,KRAS,FCGR2B,PTEN,PTPRC,IKBKB,NFAT5,PPP3CB,PPP3R1,PIK3CG,FOXO3,CREB1,IRS2,PPP3CA,IL4R,NRAS,CD79B,RAC1,ATF2,TLR4,FOS,CALM1 (includes others),PRKCI,CBL,DAPP1,BCL10,VAV3,SYK,ITPR3,NFATC2,PRKCB,CAMK2G
Glioma Invasiveness Signaling	1.61	0.0245471	PIK3CA,NRAS,PIK3C2A,MAPK1,RHOC,HMMR,PIK3R5,PLAUR,KRAS,RHOG,RND3,RHOT1,PIK3C3,PIK3CG,RHOA,CD44,RHOF,FNBP1,MMP9,TIMP2
PDGF Signaling	1.61	0.0245471	MAP2K4,RAF1,PIK3CA,JAK1,MAPK1,SOS2,PIK3R5,CRK,KRAS,JAK2,PIK3C3,PIK3CG,SOS1,PDGFRA,RASA1,NRAS,PIK3C2A,MAP3K1,STAT3,FOS,SYNJ1,INPP5F,EIF2AK2,JAK3,PRKCB
Cardiac Hypertrophy Signaling	1.61	0.0245471	MAP2K4,RAF1,TGFBR1,MAPK1,MYL6,ADCY4,KRAS,MAPK13,TGFBR2,GNB1,GNB4,RHOG,CACNA1E,PIK3CG,PPP3R1,GSK3B,MAP3K2,RPS6KB1,CACNA1C,GNAZ,CACNA1A,GNG10,ATF2,MYL12A,RND3,RHOA,FNBP1,MAP2K6,PIK3CA,PIK3R5,ATF6,MAP3K5,EIF2B2,EIF4E,PPP3CB,RHOT1,PIK3C3,CREB1,SOS1,IGF1R,PRKAR1B,RHOF,PPP3CA,ADRB2,NRAS,PIK3C2A,RHOC,MAP3K1,MEF2A,PRKAR2A,GNAQ,CALM1 (includes others),GNAI3,MAPK14,PRKAG2,MAP3K8,PRKAR1A
LPS-stimulated MAPK Signaling	1.61	0.0245471	MAP2K6,MAP2K4,RAF1,PIK3CA,NRAS,PIK3C2A,MAPK1,PIK3R5,RAC1,KRAS,MAP3K5,MAPK13,CDC42,ATF2,IKBKB,TLR4,FOS,PRKCI,MAPK14,PIK3CG,PIK3C3,CREB1,PRKCE,PRKCB
Prolactin Signaling	1.61	0.0245471	SOCS3,RAF1,PIK3CA,NRAS,PIK3C2A,MAPK1,SOS2,PIK3R5,KRAS,JAK2,STAT3,CEBPB,NR3C1,FOS,PRKCI,SP1,PTPN11,PIK3C3,PIK3CG,SOS1,PRKCE,NMI,STAT5B,PRKCB
p38 MAPK Signaling	1.58	0.0263027	MAP2K6,MAP2K4,TIFA,TGFBR1,DDIT3,TAB2,HMGN1,RPS6KA3,MAP3K5,MAPK13,FAS,IL1R2,TGFBR2,TRADD,DUSP10,CREB1,MKNK1,IL1RAP,RPS6KB1,TNFRSF1A,MEF2A,IRAK3,IL1R1,CREB5,IL18RAP,ATF2,TRAF6,PLA2G4A,H3F3A/H3F3B,MAPK14,IL1RN,DUSP1,IL1RAPL1
fMLP Signaling in Neutrophils	1.58	0.0263027	RAF1,PIK3CA,MAPK1,ARPC5,PIK3R5,KRAS,CDC42,GNB1,GNB4,ACTR3,NFAT5,PPP3CB,PPP3R1,PIK3CG,PIK3C3,CYBB,PRKCE,PPP3CA,ACTR2,NRAS,PIK3C2A,FPR2,RAC1,FPR1,GNG10,CALM1 (includes others),GNAI3,PRKCI,ARPC2,ITPR3,NFATC2,PRKCB
RANK Signaling in Osteoclasts	1.58	0.0263027	MAP2K6,MAP2K4,RAF1,PIK3CA,PTK2B,MAPK1,TAB2,PIK3R5,MAP3K5,MAPK13,IKBKB,PPP3CB,PPP3R1,PIK3C3,PIK3CG,PPP3CA,MAP3K2,PIK3C2A,MAP3K1,TRAF6,CALM1 (includes others),FOS,MAPK14,CBL,NFATC2,MAP3K8,BIRC2
Role of JAK family kinases in IL-6-type Cytokine Signaling	1.5	0.0316228	MAP2K4,SOCS3,JAK1,MAPK14,PTPN11,MAPK1,OSM,STAT3,MAPK13,JAK2,STAT5B
JAK/Stat Signaling	1.48	0.0331131	STAT6,RAF1,SOCS3,PIK3CA,JAK1,NRAS,PIK3C2A,MAPK1,SOS2,PIAS1,GNAQ,PIK3R5,KRAS,STAT3,JAK2,FOS,PTPN11,PIK3C3,PIK3CG,SOS1,STAT5B,JAK3
Neurotrophin/TRK Signaling	1.48	0.0331131	MAP2K6,MAP2K4,RAF1,PIK3CA,NRAS,PIK3C2A,MAPK1,NTF4,SOS2,PIK3R5,KRAS,MAP3K5,CDC42,CREB5,ATF2,FOS,PTPN11,GAB1,PIK3C3,PIK3CG,CREB1,SOS1
mTOR Signaling	1.48	0.0331131	PIK3CA,PRKAB2,MAPK1,PPP2CA,PPP2R2A,PIK3R5,RPS6KA3,FKBP1A,KRAS,RPS21,RICTOR,RPS23,EIF4E,RPS7,RPS27,RHOG,EIF3B,RHOT1,PIK3C3,PIK3CG,PRKAA1,PRKCE,PPP2R5C,RHOF,RPS24,RPS6KB1,MAPKAP1,NRAS,PIK3C2A,RHOC,RPS28,RAC1,RPS27L,PLD1,PPP2R5A,RPS29,PLD4,RPS6,PRKCI,RND3,RPS26,RHOA,RPS15,PRKAG2,RPS15A,PPP2R5E,FNBP1,PRKCB
GDNF Family Ligand-Receptor Interactions	1.43	0.0371535	MAP2K4,RAF1,PIK3CA,NRAS,PIK3C2A,MAPK1,SOS2,PIK3R5,RAC1,KRAS,NCK1,DOK3,CDC42,FOS,GAB1,PIK3CG,PIK3C3,CREB1,SOS1,ITPR3,IRS2,RASA1
Endometrial Cancer Signaling	1.43	0.0371535	RAF1,PIK3CA,NRAS,PIK3C2A,MAPK1,SOS2,ILK,PIK3R5,CTNNA1,KRAS,PTEN,CASP9,PIK3C3,PIK3CG,FOXO3,SOS1,GSK3B,CTNNB1
NGF Signaling	1.43	0.0371535	MAP2K4,RAF1,PIK3CA,MAPK1,SOS2,RPS6KA3,PIK3R5,CRK,KRAS,MAP3K5,CDC42,IKBKB,RHOG,PIK3CG,PIK3C3,CREB1,SOS1,MAP3K2,RPS6KB1,NRAS,PIK3C2A,MAP3K1,RAC1,CREB5,RAP1A,ATF2,TRAF6,PTPN11,GAB1,RHOA,MAP3K8
EGF Signaling	1.43	0.0371535	MAP2K4,RPS6KB1,RAF1,PIK3CA,JAK1,PIK3C2A,MAPK1,SOS2,MAP3K1,PIK3R5,STAT3,MAPK13,FOS,MAPK14,PIK3C3,PIK3CG,SOS1,ITPR3,RASA1
ErbB Signaling	1.43	0.0371535	MAP2K6,MAP2K4,RAF1,PIK3CA,MAPK1,SOS2,PIK3R5,KRAS,MAPK13,NCK1,CDC42,PIK3C3,PIK3CG,SOS1,PRKCE,GSK3B,RPS6KB1,PAK2,NRAS,PIK3C2A,FOS,PRKCI,MAPK14,PAK3,TGFA,PRKCB
PPARα/RXRα Activation	1.43	0.0371535	PPARA,MAP2K4,MAP2K6,RAF1,MED23,TGFBR1,PRKAB2,MAPK1,ADCY4,SOS2,KRAS,CYP2C9,JAK2,GK,ABCA1,TGFBR2,IL1R2,IKBKB,GPD2,SOS1,PRKAR1B,PRKAA1,NCOR1,STAT5B,IL1RAP,SMAD2,NRAS,MED1,ACOX1,PRKAR2A,CD36,GNAQ,IL1R1,NCOA3,ACVR1B,IL18RAP,TRAF6,MAPK14,PRKAG2,IL1RAPL1,ADIPOR2,MAP4K4,PRKAR1A,PRKCB
Paxillin Signaling	1.42	0.0380189	MAP2K4,PIK3CA,PTK2B,MAPK1,ACTA2,SOS2,PIK3R5,CRK,TLN1,KRAS,MAPK13,NCK1,CDC42,PTPN12,ITGAE,PIK3CG,PIK3C3,SOS1,PAK2,NRAS,PIK3C2A,RAC1,ACTG1,GIT2,ARF1,MAPK14,ITGAM,PAK3,ITGA7
Production of Nitric Oxide and Reactive Oxygen Species in Macrophages	1.42	0.0380189	PPARA,MAP2K4,PPP1CC,PIK3CA,JAK1,MAPK1,PPP2CA,PPP2R2A,PIK3R5,MAPK13,MAP3K5,JAK2,IKBKB,RHOG,RHOT1,PIK3CG,PIK3C3,CYBB,PRKCE,PPP2R5C,S100A8,RHOF,MAP3K2,PIK3C2A,TNFRSF1A,RHOC,MAP3K1,RAC1,IFNGR2,IFNGR1,NCF4,RAP1A,PPP2R5A,TLR2,TLR4,FOS,PPP1R3D,PRKCI,MAPK14,RND3,RHOA,PPP1R12A,MAP3K8,PPP2R5E,JAK3,FNBP1,PRKCB
CD28 Signaling in T Helper Cells	1.42	0.0380189	MAP2K4,PIK3CA,ARPC5,PIK3R5,CDC42,PTPRC,IKBKB,ACTR3,NFAT5,PPP3CB,PIK3C3,PIK3CG,PPP3R1,PPP3CA,ACTR2,PIK3C2A,MAP3K1,RAC1,FOS,CALM1 (includes others),PTPN11,BCL10,GRAP2,CARD11,ARPC2,SYK,ITPR3,FCER1G,NFATC2,CD86,LCP2
PKCθ Signaling in T Lymphocytes	1.42	0.0380189	MAP2K4,PIK3CA,MAPK1,SOS2,PIK3R5,KRAS,MAP3K5,IKBKB,NFAT5,PPP3CB,PIK3C3,PIK3CG,PPP3R1,SOS1,PPP3CA,MAP3K2,NRAS,PIK3C2A,MAP3K1,RAC1,FOS,BCL10,GRAP2,CARD11,VAV3,FCER1G,NFATC2,CD86,MAP3K8,LCP2,CAMK2G
IL-6 Signaling	1.41	0.0389045	MAP2K6,MAP2K4,SOCS3,RAF1,PIK3CA,MAPK1,SOS2,PIK3R5,KRAS,MAPK13,JAK2,IL1R2,IKBKB,PIK3CG,PIK3C3,SOS1,IL1RAP,MCL1,NRAS,PIK3C2A,TNFAIP6,TNFRSF1A,CEBPB,IL1R1,STAT3,IL18RAP,TRAF6,FOS,MAPK14,PTPN11,IL1RN,IL1RAPL1,MAP4K4
Rac Signaling	1.41	0.0389045	MAP2K4,RAF1,PIK3CA,PTK2B,MAPK1,ARPC5,PIK3R5,PIKFYVE,LIMK2,KRAS,CDC42,IQGAP1,ACTR3,PIK3CG,PIK3C3,CYBB,RPS6KB1,ACTR2,PAK2,NRAS,PIK3C2A,MAP3K1,BRK1,RAC1,PLD1,PRKCI,PAK3,ARPC2,RHOA,CD44
ERK5 Signaling	1.41	0.0389045	RPS6KB1,NRAS,SGK1,YWHAB,GNAQ,RPS6KA3,YWHAZ,MEF2A,KRAS,CREB5,ATF2,YWHAQ,FOS,PTPN11,GAB1,CREB1,FOXO3,MAP3K8,SFN,MAP3K2
IL-2 Signaling	1.41	0.0389045	RAF1,PIK3CA,JAK1,NRAS,PIK3C2A,PTK2B,MAPK1,SOS2,PIK3R5,KRAS,FOS,PTPN11,PIK3C3,SYK,PIK3CG,SOS1,STAT5B,JAK3
Germ Cell-Sertoli Cell Junction Signaling	1.41	0.0389045	MAP2K4,MAP2K6,PIK3CA,TGFBR1,MAPK1,ACTA2,CTNNA1,PIK3R5,ILK,KRAS,LIMK2,MAP3K5,IQGAP1,TUBB,CDC42,TGFBR2,RHOG,WASL,RHOT1,PIK3CG,PIK3C3,CTNNB1,RHOF,RAB8B,MAP3K2,NRAS,PAK2,PIK3C2A,TJP1,TNFRSF1A,RHOC,MAP3K1,TUBA4A,RAC1,ACTG1,MAPK14,RND3,PAK3,RHOA,MAP3K8,FNBP1
IL-4 Signaling	1.37	0.042658	STAT6,RPS6KB1,IL4R,PIK3CA,JAK1,NRAS,PIK3C2A,IL13RA1,SOS2,PIK3R5,KRAS,JAK2,HMGA1,NR3C1,NFAT5,SYNJ1,INPP5F,PIK3C3,PIK3CG,SOS1,NFATC2,JAK3
SAPK/JNK Signaling	1.36	0.0436516	MAP2K4,PIK3CA,SOS2,PIK3R5,CRK,KRAS,MAP3K5,CDC42,GNB1,TRADD,PIK3C3,DUSP10,PIK3CG,SOS1,MAP3K2,MAP4K2,NRAS,PIK3C2A,MAP3K1,RAC1,ATF2,MINK1,GAB1,ZAK,FCER1G,MAP4K4
GNRH Signaling	1.33	0.0467735	MAP2K6,MAP2K4,RAF1,MAPK1,ADCY4,SOS2,KRAS,MAP3K5,MAPK13,CDC42,SOS1,CREB1,PRKAR1B,PRKCE,MAP3K2,PAK2,NRAS,MAP3K1,GNAQ,RAC1,PRKAR2A,CREB5,ATF2,FOS,GNAI3,MAPK14,PRKCI,PAK3,ITPR3,GNRH1,PRKAG2,MAP3K8,CAMK2G,PRKAR1A,PRKCB
Phosphatidylglycerol Biosynthesis II (Non-plastidic)	1.31	0.0489779	ABHD5,LPCAT4,PTPMT1,MBOAT2,AGPAT9,PGS1,AGPAT3,CDS2
24h_Male_CanonicalPathways
Ingenuity Canonical Pathways	-log(B-H p-value)	B-H p-value	Molecules
B Cell Receptor Signaling	2.52	0.00301995	MAP2K6,GAB2,MAPK1,PIK3R5,MAP3K5,MAPK13,PTPRC,NFAT5,PPP3R1,PIK3CG,PIK3C3,SOS1,CD79B,MAP3K1,RAC1,TCF3,CREB5,MAPK14,SYNJ1,GAB1,DAPP1,BCL10,PAG1,NFATC2,MAP3K3
Toll-like Receptor Signaling	1.92	0.0120226	TRAF6,MAP2K6,TLR4,TLR10,MAPK14,TLR5,MAPK1,MAP3K1,TLR8,MAPK13,IRAK3,TIRAP
Fcγ Receptor-mediated Phagocytosis in Macrophages and Monocytes	1.92	0.0120226	GAB2,ACTR2,PTK2B,MAPK1,RAC1,FCGR1A,PLD1,PLD4,PAK1,CBL,WAS,ARPC2,PIK3CG,RAB11A,LCP2,FGR
T Cell Receptor Signaling	1.92	0.0120226	MAPK1,MAP3K1,RAC1,PIK3R5,PTPRC,CBL,NFAT5,CARD11,BCL10,PPP3R1,PAG1,PIK3CG,PIK3C3,SOS1,NFATC2,LCP2
FGF Signaling	1.92	0.0120226	MAP2K6,MAPK1,MAP3K1,RAC1,PIK3R5,STAT3,MAPK13,MAP3K5,CREB5,MAPK14,GAB1,HGF,PIK3CG,PIK3C3,SOS1
RANK Signaling in Osteoclasts	1.92	0.0120226	MAP2K6,PTK2B,MAPK1,MAP3K1,PIK3R5,MAPK13,MAP3K5,TRAF6,MAPK14,CBL,PPP3R1,PIK3CG,PIK3C3,NFATC2,MAP3K3
Renal Cell Carcinoma Signaling	1.92	0.0120226	MAPK1,RAC1,PIK3R5,RAP1A,ARNT,PAK1,GAB1,PIK3CG,PIK3C3,HGF,SOS1,TGFA,FH
CD28 Signaling in T Helper Cells	1.89	0.0128825	ACTR2,MAP3K1,RAC1,PIK3R5,PTPRC,PAK1,NFAT5,BCL10,CARD11,WAS,PIK3C3,PPP3R1,ARPC2,PIK3CG,FCER1G,NFATC2,LCP2
FLT3 Signaling in Hematopoietic Progenitor Cells	1.83	0.0147911	GAB2,MAPK1,PIK3R5,STAT3,MAPK13,CREB5,MAPK14,CBL,PIK3CG,PIK3C3,SOS1,RPS6KA2,STAT5B
IL-22 Signaling	1.75	0.0177828	SOCS3,JAK1,MAPK14,MAPK1,STAT3,MAPK13,STAT5B
Role of JAK family kinases in IL-6-type Cytokine Signaling	1.67	0.0213796	SOCS3,JAK1,MAPK14,MAPK1,STAT3,MAPK13,STAT5B
PKCθ Signaling in T Lymphocytes	1.59	0.025704	MAPK1,MAP3K1,RAC1,PIK3R5,MAP3K5,NFAT5,CARD11,BCL10,PPP3R1,PIK3CG,PIK3C3,SOS1,FCER1G,NFATC2,MAP3K3,LCP2
Role of JAK1 and JAK3 in γc Cytokine Signaling	1.55	0.0281838	SOCS3,JAK1,FES,MAPK1,PTK2B,PIK3CG,PIK3C3,IL21R,PIK3R5,STAT3,STAT5B
HGF Signaling	1.55	0.0281838	MAPK1,MAP3K1,RAC1,PIK3R5,STAT3,MAP3K5,RAP1A,ELF4,PAK1,GAB1,PIK3CG,PIK3C3,HGF,SOS1,MAP3K3
IL-3 Signaling	1.5	0.0316228	GAB2,PAK1,JAK1,MAPK1,PIK3CG,PIK3C3,PPP3R1,SOS1,RAC1,PIK3R5,STAT3,STAT5B
Hypoxia Signaling in the Cardiovascular System	1.45	0.0354813	UBE2G2,UBE2J1,UBE2A,UBE2G1,UBE2R2,UBE2D2,UBE2V1,HIF1AN,UBE2S,CREB5,ARNT
EGF Signaling	1.34	0.0457088	JAK1,MAPK14,MAPK1,PIK3CG,PIK3C3,MAP3K1,SOS1,PIK3R5,STAT3,MAPK13

## Sheet: TableS3
TABLE S3. SIGNIFICANTLY ENRICHED DISEASE AND FUNCTION CATEGORIES AT 3h FOLLOWING CARDIOEMBOLIC STROKE IN FEMALE AND IN MALE.
3h Female Disease And Finction
Category	B-H p-value	Molecules
Cell Death and Survival	2.51E-03-2.14E-01	AKAP8L,CSTA,APH1B,DNAJC3,TXNDC5,TMBIM6,XRCC2,SRCIN1,SMAD2,RHEB,LAMTOR5,CLEC5A,IFNAR2,RAP1A,LILRB1,MIB1,ITPR3,RRAGA,CD86,CFLAR,BCL2A1,mir-21,XRCC5,UBE2C,FTH1,HTATIP2,WDR26,CEBPD,ILK,MYLK3,MCTS1,BECN1,SMARCA4,AQP3,ELF4,NOTCH2,PIK3C3,STAM2,FBXL5,ATN1,PPM1M,CD79B,ENTPD1,MYD88,EMP3,VIM,IRAK3,DEDD,SOAT1,SH3BP5,TPP1,SOX9,CXADR,PSEN1,DAD1,JAK1,NDRG2,KIF1B,PTTG1,KLF6,DNAJC15,SKA1,NOA1,PTEN,STK4,RHOG,UBE2B…
Cell-To-Cell Signaling and Interaction	2.51E-03-2.16E-01	JMJD6,TPH1,HMGB1,SMAD2,ACTR2,RAB27A,ATG7,LECT2,CLEC5A,IFNAR2,LILRB1,CLEC4E,ARPC2,TNFRSF25,CD86,ALOX5,BCL2A1,IFNAR1,LCP2,mir-21,UBE2C,MAP2K6,SORL1,FKBP1A,CDK11A/CDK11B,BECN1,SMARCA4,VCAN,NFIL3,NOTCH2,SORT1,CD79B,ENTPD1,MYD88,PLCG1,VIM,IRAK3,CR1,DAPP1,WAS,PELI1,CD44,FCER1G,PRMT5,ADAM10,CXCR5,PSEN1,FCAR,JAK1,MAPK1,ATXN3,KLF6,TLR8,ABCA1,PTEN,METAP2,RHOG,CD84,DLG1,BMP2K,HDAC4,TNPO1,CD93,RAC1,DOK3,TLR2…
Cellular Function and Maintenance	2.51E-03-2.2E-01	EME1,HNRNPL,TCIRG1,SH3GLB1,CCNB2,JMJD6,TPH1,HMGB1,ACTR2,SMAD2,ATG7,LECT2,IFNAR2,RAP1A,AQP9,CLEC4E,MIB1,ARPC2,ITPR3,PRELID1,TNFRSF25,CD86,BCL2A1,ALOX5,IFNAR1,XRCC5,LCP2,SORL1,ILK,FKBP1A,BECN1,SMARCA4,RAB22A,AQP3,ELF4,NFIL3,NOTCH2,CREB1,FGD4,STAM2,SORT1,CD79B,ENTPD1,MYD88,BRK1,PLCG1,VIM,HNRNPD,GIT2,KIAA0226,LAMP2,CR1,PAK3,DAPP1,WAS,DENND1A,FCER1G,ADAM10,CD44,PAFAH1B1,PSEN1,FCAR,JAK1,MAPK1,UNC5B,TLR…
Inflammatory Response	2.51E-03-2.23E-01	IDS,TCIRG1,JMJD6,TPH1,HMGB1,SRCIN1,TXN,TIMP2,LAMTOR5,RAB27A,ATG7,LECT2,ZC3HAV1,CLEC5A,IFNAR2,LILRB1,AQP9,CLEC4E,MIB1,TNFRSF25,CD86,ALOX5,BCL2A1,IFNAR1,mir-21,LCP2,MME,MYLK3,CEBPD,FKBP1A,BECN1,SMARCA4,VCAN,XPR1,LIPA,TRADD,ELF4,NFIL3,NOTCH2,GBA,STAM2,PCBP2,ENTPD1,CD79B,MYD88,VIM,IFI27L2,IRAK3,KIAA0226,GIT2,CR1,LAMP2,DAPP1,WAS,PELI1,ADAM10,FCER1G,CD44,CXCR5,PAFAH1B1,CXADR,QPCT,PSEN1,FCAR,JAK1,MAPK1,…
Hematological System Development and Function	2.51E-03-2.16E-01	HNRNPL,TCIRG1,CCNB2,KPNA1,JMJD6,TPH1,HMGB1,SRCIN1,TXN,TIMP2,SMAD2,RAB27A,ATG7,LECT2,GGCX,CLEC5A,IFNAR2,RAP1A,LILRB1,AQP9,CLEC4E,MIB1,TNFRSF25,PRELID1,CD86,CFLAR,BCL2A1,NUP98,ALOX5,XRCC5,IFNAR1,LCP2,mir-21,MAP2K6,ILK,MYLK3,FKBP1A,BECN1,VCAN,SMARCA4,AQP3,ELF4,TRADD,NOTCH2,NFIL3,GBA,CREB1,STAM2,PARL,CD79B,ENTPD1,MYD88,PLCG1,HNRNPD,IRAK3,SOAT1,GIT2,CR1,DAPP1,WAS,PELI1,CD44,FCER1G,ADAM10,CXCR5,ZFP36L2…
Cardiovascular Disease	6.6E-03-1.95E-01	MAP2K6,CD59,MAPK1,MYD88,ATP2C1,UNC5B,IL1R1,BECN1,NR3C1,TLR2,CR1,MAPK14,DUSP1,ANXA1,CREM,CD44,TXN,MMP9,mir-21
Infectious Disease	6.6E-03-2.23E-01	TCIRG1,TM9SF2,STAU1,MTX1,TPH1,HMGB1,GPD2,ETF1,TXN,TIMP2,KPNA4,SMAD2,ACTR2,ATG7,BAHD1,ZC3HAV1,AASS,SRRM2,TNK2,CHRNA10,IFNAR2,RAB31,PDSS1,CLEC4E,RAB11A,CD86,NUP98,ALOX5,IFNAR1,CANT1,LCP2,ATP6V0E1,UBE2C,PPP2R2A,CEBPD,FKBP1A,NUP214,BECN1,HARBI1,IDH1,TRADD,YY1,NFIL3,PIK3C3,CREB1,PCBP2,MYD88,PLCG1,HNRNPD,IRAK3,TSG101,COPG1,RBM7,LAMP2,PAK3,PELI1,CD44,ADAM10,FCER1G,CXADR,LYSMD1,TRIM25,PSEN1,SPCS3,SDF4,SR…
Respiratory Disease	6.81E-03-1.74E-01	TCIRG1,PTTG1,CEBPD,FKBP1A,NFKB1,MTX1,NR3C1,SLC2A3,DEF6,C20orf24,PTEN,CD164,LIPA,NFIL3,HMGB1,LINC00937,ANXA1,CASP1,TIMP2,ENTPD1,MYD88,RAC1,S100A12,IL1R1,RAB31,GIT2,TLR2,ENO1,ITGAM,CLEC4E,SLCO3A1,TLR5,DUSP1,CARD11,GYG1,TNFRSF25,CD44,CD86,ALOX5,CXADR,mir-21,MMP9,IFNAR1,LCP2,ARG1
Cancer	1.01E-02-2.11E-01	KCNJ2,LRG1,FOLH1,DNAJC3,CCNB2,STK35,XRCC2,ANKRD28,GPD2,ETF1,SMAD2,KPNA4,RHEB,BCOR,BAHD1,SRRM2,IFNAR2,RAP1A,LILRB1,PDSS1,MIB1,ITPR3,CD86,PSMD1,CFLAR,BCL2A1,NUP98,XRCC5,mir-21,UBE2C,FTH1,KIF20A,TRIM33,APBA2,HTATIP2,CEBPD,ILK,MCTS1,BECN1,SMARCA4,AQP3,NOTCH2,ECHS1,ENTPD1,CD79B,MYD88,EMP3,VIM,CPEB4,SOX9,NUTF2,PSEN1,QPCT,SDF4,JAK1,SEPT9,NDRG2,PTTG1,KLF6,TLR8,SKA1,AKIRIN2,PTEN,STK4,RHOG,CACNA1E,C18orf8,…
Cellular Movement	1.01E-02-1.95E-01	HNRNPL,TCIRG1,FOLH1,CCNB2,FNDC3B,STK35,JMJD6,ANKRD28,TPH1,HMGB1,SRCIN1,TXN,TIMP2,ACTR2,SMAD2,RAB27A,YWHAZ,CLEC5A,TNK2,HYAL4,LILRB1,RAP1A,AQP9,CLEC4E,MIB1,ARPC2,ZAK,TNFRSF25,RAB11A,CD86,ALOX5,mir-21,IFNAR1,LCP2,FTH1,KIF20A,MME,MAP2K6,HTATIP2,WDR26,KPNA2,CEBPD,ILK,MYLK3,FKBP1A,GALNT2,BECN1,VCAN,SMARCA4,AQP3,ELF4,YY1,NOTCH2,GBA,PIK3C3,TCOF1,CREB1,FGD4,NRD1,ADAM19,SORT1,LPP,SLC12A6,ENTPD1,MYD88,BRK1,…
Tumor Morphology	1.01E-02-1.84E-01	ATG7,MAPK1,ASAP1,RAC1,PLAUR,FKBP1A,LIMK2,BECN1,BIRC5,PTEN,YY1,NOTCH2,RHOG,CD44,RHOBTB2,PAFAH1B1,MMP9,mir-21
Cell Cycle	1.72E-02-1.95E-01	EME1,CCNB2,XRCC2,HMGB1,TXN,VCPIP1,ZFHX3,CENPJ,TIMP2,SMAD2,LAMTOR5,RHEB,ATG7,TFDP1,CREM,ZAK,RAB11A,ME2,CDK19,BCL2A1,XRCC5,mir-21,UBE2C,KIF20A,MAP2K6,TRIM33,PPP2R2A,KPNA2,ILK,CEBPD,NUP214,FKBP1A,CDK11A/CDK11B,BECN1,SMARCA4,VCAN,USP3,ELF4,TRADD,YY1,NOTCH2,PIK3C3,CREB1,HJURP,ELAC2,STRADA,PLCG1,HNRNPD,TSG101,PPP2R5A,FGGY,WAS,PRMT5,CD44,STX16,SOX9,PAFAH1B1,TRIM25,PSEN1,SRPK1,JAK1,MAPK1,SEPT9,PTTG1,KLF6…
Molecular Transport	1.79E-02-1.95E-01	NIPA2,KCNJ2,TCIRG1,TM9SF2,STAU1,SLC26A8,KPNA1,ATP11B,SCYL2,SRCIN1,TGOLN2,APPBP2,KPNA4,RAB27A,TIMM44,YWHAZ,ZC3HAV1,CHRNA10,CLEC5A,SLC44A1,LILRB1,AQP9,CLEC4E,CREM,ITPR3,RAB11A,TIMM23,ADIPOR2,NUP98,ALOX5,ATP6V0E1,LCP2,MAP2K6,KIF20A,PTTG1IP,SORL1,CASC3,KPNA2,ILK,NUP214,GK,AQP3,NFIL3,PIK3C3,CREB1,SORT1,SLC12A6,ABHD5,ENTPD1,MYD88,STRADA,PLCG1,SLC25A3,HNRNPD,SOAT1,VDAC3,TSG101,VPS9D1,GLTP,LAMP2,SAR1A,FC…
Protein Trafficking	1.79E-02-1.95E-01	SORL1,PTTG1IP,DYNLT1,KIF1B,KPNA2,VAPA,NUP214,KPNA1,SCYL2,ANXA1,PIK3C3,SRCIN1,CASP1,DNAJA2,SEC61B,SORT1,APPBP2,CHMP3,KPNA4,TIMM44,STRADA,TNPO1,FGF9,RAB7A,TSNAX,CANX,PLCG1,CLEC5A,S100A12,SOAT1,TSG101,TLR2,MAPK14,RBM22,CLEC4E,NLRP12,RAB11A,TIMM23,SNX6,GAPVD1,ATP6V0E1,SIX3,NUTF2,LCP2,PSEN1
Protein Synthesis	2.19E-02-2E-01	SIK3,JAK1,MAPK1,ATXN3,TCIRG1,PTTG1,UBE2D2,TLR8,MAPK13,KPNA1,PBK,PTEN,STK4,RHOG,UBE2B,GPD2,DYSF,CD84,TIMP2,PSMB5,ATG7,RLIM,RAC1,CTRL,AURKA,IFNAR2,TBL1X,TLR2,ITCH,UBE2G2,CARD11,CD86,ME2,ALOX5,IFNAR1,LCP2,UBE2C,UBE2I,MME,SPIB,ILK,GALNT2,GALNT1,NFKB1,NR3C1,DEF6,IDH1,USP3,NFIL3,NOTCH2,GBA,SP1,MKNK1,CD22,ADAM19,NRD1,CASP1,STAT5B,ATN1,IL13RA1,HIPK3,MYD88,MAP3K1,BRK1,CANX,HNRNPD,IL1R1,IRAK3,PDK3,TSG101,F…
Immune Cell Trafficking	2.26E-02-2.16E-01	HNRNPL,TCIRG1,JMJD6,TPH1,HMGB1,SRCIN1,TXN,TIMP2,RAB27A,LECT2,CLEC5A,HYAL4,RAP1A,LILRB1,AQP9,CLEC4E,MIB1,TNFRSF25,CD86,ALOX5,BCL2A1,LCP2,IFNAR1,mir-21,WDR26,ILK,MYLK3,FKBP1A,SMARCA4,VCAN,ELF4,AQP3,NOTCH2,NFIL3,GBA,ENTPD1,CD79B,MYD88,IRAK3,GIT2,CR1,DAPP1,WAS,PELI1,ADAM10,FCER1G,CD44,CXCR5,PAFAH1B1,CXADR,QPCT,FCAR,JAK1,UNC5B,TLR8,ABCA1,PTEN,STK4,CD84,DLG1,BMP2K,HDAC4,CD93,RAC1,DOK3,TLR2,ITCH,ITGAM,D…
Embryonic Development	2.26E-02-1.95E-01	EME1,DAD1,MAPK1,PTTG1,UNC5B,LATS2,ABCA1,METAP2,PTEN,XRCC2,STK4,MTF1,TIMP2,SMAD2,RHEB,OVOL2,ATG7,TFDP1,FGF9,RAC1,DPPA4,ACVR1B,NCOA3,MORF4L1,ITCH,TLR2,ITGAM,MIB1,TNFRSF25,CD86,CFLAR,BCL2A1,LDHA,IFNAR1,LCP2,XRCC5,MAP2K6,SORL1,TRIM33,SPIB,UGCG,BECN1,NFKB1,TRADD,YY1,NOTCH2,PIK3C3,F5,CASP1,SORT1,ATP2C1,EMP3,MAP3K1,RAB7A,PLAUR,BIRC5,TSG101,EMP1,MORF4L2,CD44,ADAM10,PRMT5,RBMS1,CXCR5,PAFAH1B1,PSEN1
Organismal Injury and Abnormalities	2.26E-02-1.95E-01	MME,MAP2K6,MAPK1,ATXN3,ATXN1,UNC5B,NFKB1,BECN1,ABCA1,IDH1,DEF6,JMJD6,NOTCH2,TPH1,HMGB1,GBA,ANXA1,F5,CREB1,CASP1,TXN,CENPJ,SMAD2,CD59,CEP152,MYD88,MAP3K1,RAC1,VIM,BMX,IL1R1,SOAT1,MORF4L1,TRIM69,TLR2,NIN,CR1,MAPK14,B4GALT1,MIB1,DUSP1,CREM,CD44,ALOX5,mir-21,MMP9,PSEN1
Tissue Morphology	2.26E-02-1.95E-01	SIK3,ATXN1,TCIRG1,DNAJC3,CCNB2,MAPK13,KPNA1,JMJD6,TPH1,HMGB1,GPD2,SRCIN1,TIMP2,SMAD2,ATG7,TFDP1,LECT2,IFNAR2,RAP1A,MORF4L1,EAPP,CLEC4E,ZAK,CREM,TNFRSF25,CD86,CFLAR,ALOX5,BCL2A1,LCP2,XRCC5,IFNAR1,FTH1,MME,TRIM33,CEBPD,MCTS1,BECN1,SMARCA4,LIPA,ELF4,NOTCH2,NFIL3,GBA,PIK3C3,TCOF1,CREB1,FBXL5,STAM2,PARL,ATN1,CD79B,ENTPD1,MYD88,PLCG1,IRAK3,SOAT1,TSG101,DAPP1,WAS,ADAM10,FCER1G,CD44,SOX9,CXCR5,PAFAH1B1,Z…
Respiratory System Development and Function	2.26E-02-7.35E-02	LIPA,MAPK14,NR3C1,ABCA1,PTEN
Renal and Urological Disease	2.4E-02-1.93E-01	FCAR,PSMB5,MYD88,UNC5B,TLR8,RAC1,IL1R1,TRIM69,TLR2,TLR5,DUSP1,PSMD2,CD44,PSMD1,ALOX5,TFE3,MMP9,mir-21,PSEN1,TIMP2
Cell Signaling	2.63E-02-1.55E-01	JAK1,SRPK1,MAPK1,KLF6,TLR8,MAPK13,LATS2,PBK,TMED4,PTEN,STK4,STK17B,TIMP2,TMEM9B,FGF9,FCRL4,RAC1,IFNAR2,ITCH,ITGAM,AIDA,DUSP1,CARD11,ZAK,CDC42SE1,IFNAR1,CANT1,MAP2K6,SPIB,VAPA,ILK,GALNT2,FKBP1A,LILRB3,CD55,MKNK1,CD22,CASP1,STAT5B,TRAF7,HIPK3,CD79B,MYD88,BRAP,ATP2C1,MAP3K1,CD48,PLCG1,IL1R1,IRAK3,S100A12,PDK3,MAPK14,PAK3,NLRP12,PELI1,FCER1G,CD44,FCRL3,NENF,MAP4K4,PSEN1
Post-Translational Modification	3.19E-02-1.87E-01	SIK3,ATXN1,SH3GLB1,MAPK13,HMGB1,TXN,VCPIP1,SMAD2,ATG7,FCRL4,ZAK,CD86,UBE2C,MAP2K6,TRIM33,RPN2,UBQLN1,ILK,MYLK3,GALNT2,FKBP1A,CDK11A/CDK11B,GK,PIK3C3,CREB1,KRTCAP2,FBXL5,PCBP2,CD79B,RNF13,PLCG1,IRAK3,SDF2,TSG101,HECW2,UBE2J1,PAK3,PELI1,CD44,FCER1G,ADAM10,SOX9,FCRL3,PSEN1,DAD1,JAK1,SRPK1,UBE2A,MAPK1,UBE2D2,LIMK2,SKP1,LATS2,PBK,PTEN,STK4,UBE2B,DNAJA2,STK17B,BMP2K,RLIM,RAC1,ST6GALNAC3,BMX,AURKA,DGUOK…
Cell Morphology	4.38E-02-1.95E-01	MFNG,PTTG1,SH3GLB1,DNAJC3,PTEN,NR2F1,STK4,RHOG,HMGB1,ANXA7,TXN,CD84,ACTR2,ATG7,RAC1,YWHAZ,AURKA,RAP1A,SIPA1L1,TLR2,PTBP1,AQP9,CARD11,ARPC2,ZAK,CDC42SE1,ADIPOR2,XRCC5,LCP2,SPIB,ILK,BECN1,GLRX,NR3C1,AQP3,LIPA,ELF4,ANXA1,CREB1,CASP1,FGD4,CD22,PARL,STAT5B,ENTPD1,CD79B,ASAP1,MYD88,SVIL,SLA,RAB7A,PLCG1,VIM,KIAA0226,LAMP2,MAPK14,PAK3,WAS,ADAM10,CD44,FCER1G,SOX9,PAFAH1B1,PSEN1
Cellular Assembly and Organization	4.38E-02-2.2E-01	EME1,SRPK1,ATXN3,PTTG1,CCNB2,LATS2,SKA1,PTEN,NR2F1,XRCC2,UBE2B,ANXA7,DYSF,VCPIP1,CHMP3,DLG1,ACTR2,RAB27A,HDAC4,TFDP1,RAC1,YWHAZ,AURKA,RAB34,NCOA3,SIPA1L1,CCNB1,TLR2,ITGAM,ARPC2,ITPR3,SEC22B,LCP2,MME,APBA2,HTATIP2,BECN1,NR3C1,SMARCA4,RAB22A,DEF6,PIK3C3,ANXA1,PMF1,CD22,TCP1,HJURP,AGFG1,MYD88,ATRX,RAB7A,BRK1,PLAUR,PLCG1,TSG101,PPP2R5A,KIAA0226,LAMP2,PAK3,DAPP1,WAS,CD44,PSEN1,QPCT
Gastrointestinal Disease	4.38E-02-2.11E-01	KCNJ2,TMBIM4,CALCOCO2,LRG1,FOLH1,CCNB2,MAPK13,STK35,XRCC2,ANKRD28,HMGB1,TXN,TIMP2,SMAD2,TFDP1,LECT2,YWHAZ,SRRM2,TNK2,IFNAR2,RAB31,TMEM59,MIB1,ITPR3,RGL2,CD86,ALOX5,mir-21,LDHA,IFNAR1,XRCC5,FTH1,UBE2C,KIF20A,MME,APBA2,HTATIP2,KPNA2,CEBPD,ILK,FKBP1A,BECN1,IDH1,AQP3,NOTCH2,TCOF1,SLC2A14,PGAM1,CREB1,ORC1,ECHS1,ENTPD1,MYD88,VIM,CPEB4,COPG1,WAS,CD44,ADAM10,SOX9,NENF,ZFP36L2,PSEN1,QPCT,FCAR,JAK1,SRPK1,S…
Inflammatory Disease	4.38E-02-1.93E-01	IDS,TCIRG1,ATXN1,TLR8,ITFG1,PTEN,IL1R2,HMGB1,CLEC4D,TXN,STK17B,SMAD2,C14orf2,ACOX2,LECT2,RAC1,BMX,CLEC5A,IFNAR2,HYAL4,CCNB1,TLR2,OLAH,UBE2G2,AQP9,ITGAM,CLEC4E,DUSP1,ITPR3,UQCRC2,RGL2,CD86,ALOX5,METTL9,mir-21,RTFDC1,IFNAR1,FTH1,STEAP4,ARG1,MCTP2,CASC3,MME,SORL1,MS4A6A,GALNT2,FKBP1A,NFKB1,NR3C1,DEF6,TRADD,ANXA1,CD22,CASP1,ZCCHC6,STAT5B,CD59,ENTPD1,CD79B,MYD88,TUBA4A,VIM,PLAUR,S100A12,ZNRD1-AS1,IL1R…
Ophthalmic Disease	4.38E-02-4.38E-02	IFNAR2,NR3C1,IFNAR1
Gene Expression	4.53E-02-2.01E-01	JAK1,MAPK1,PTTG1,KLF6,TLR8,STAU1,MLX,PTEN,NR2F1,JMJD6,HMGB1,MTF1,ANXA7,JUND,TXN,TFE3,FOSL2,TBX5,SMAD2,TFDP1,YWHAB,YWHAZ,RAC1,ZC3HAV1,TSNAX,BMX,TBL1X,NCOA3,ACVR1B,ITGAM,RBX1,CREM,CD86,CFLAR,IFNAR1,LCP2,XRCC5,TEF,UBE2I,MAP2K6,CASC3,APBA2,HTATIP2,SPIB,PA2G4,ILK,CEBPD,CDK11A/CDK11B,ATF6,NFKB1,GLRX,NR3C1,SMARCA4,TRADD,ELF4,NOTCH2,YY1,SP1,CRTC1,CREB1,MEG3,STAT5B,MYD88,MAP3K1,PLCG1,IL1R1,SOAT1,MAPK14,PE…
Connective Tissue Disorders	4.53E-02-1.93E-01	TCIRG1,ATXN1,TLR8,ITFG1,PTEN,IL1R2,HMGB1,CLEC4D,TXN,STK17B,CENPJ,SMAD2,C14orf2,LECT2,ACOX2,RAC1,BMX,CLEC5A,IFNAR2,HYAL4,CCNB1,TLR2,OLAH,UBE2G2,NIN,AQP9,ITGAM,CLEC4E,DUSP1,ITPR3,UQCRC2,CD86,RGL2,ALOX5,METTL9,mir-21,RTFDC1,IFNAR1,FTH1,STEAP4,ARG1,MCTP2,CASC3,MME,SORL1,MS4A6A,GALNT2,FKBP1A,NFKB1,NR3C1,DEF6,TRADD,ANXA1,CD22,CASP1,ZCCHC6,CD59,CEP152,CD79B,MYD88,TUBA4A,VIM,PLAUR,S100A12,ZNRD1-AS1,IL1R1…
Dermatological Diseases and Conditions	4.53E-02-1.95E-01	CSTA,ATXN3,SERPINB8,TAF10,MTX1,METAP2,JMJD6,HAL,HMGB1,SPTLC2,ETF1,SEC61B,JUND,TIMP2,AIM1,RAB27A,YWHAB,IFNAR2,LILRB1,MORF4L1,TLR2,AQP9,DUSP1,CFLAR,LCP2,IFNAR1,mir-21,UBE2I,ARG1,MME,KPNA2,CEBPD,FKBP1A,LILRB3,NFKB1,GK,RGS12,NR3C1,H2AFZ,AQP3,NOTCH2,NFIL3,GBA,ANXA1,PGAM1,CD22,PCBP2,CD59,IL13RA1,IL1R1,S100A12,SOAT1,SERPINB13,TLR5,ADAM10,FCER1G,GAPVD1,MMP9,PSEN1
Skeletal and Muscular Disorders	4.53E-02-1.95E-01	MAPK1,IDS,TCIRG1,ATXN1,TLR8,ITFG1,PTEN,IL1R2,HMGB1,CLEC4D,TXN,STK17B,CENPJ,SMAD2,C14orf2,LECT2,ACOX2,RAC1,BMX,CLEC5A,IFNAR2,HYAL4,CCNB1,TLR2,OLAH,UBE2G2,NIN,AQP9,ITGAM,CLEC4E,DUSP1,CREM,ITPR3,UQCRC2,CD86,RGL2,ALOX5,METTL9,mir-21,RTFDC1,IFNAR1,FTH1,STEAP4,ARG1,MCTP2,SORL1,MME,CASC3,MS4A6A,GALNT2,FKBP1A,NFKB1,NR3C1,DEF6,TRADD,ANXA1,CD22,CASP1,ZCCHC6,CD59,CEP152,CD79B,MYD88,TUBA4A,VIM,PLAUR,S100A12,…
Hematological Disease	4.86E-02-2.05E-01	JAK1,UBE2A,PPP6R2,TLR8,PTEN,XRCC2,TPH1,HMGB1,ANXA7,STK17B,KPNA4,RHEB,POLE4,PSMB5,HDAC4,MLLT10,BCOR,TFDP1,YWHAZ,RAC1,ST6GALNAC3,AURKA,IFNAR2,CCNB1,TLR2,ZNF230,ITGAM,CARD11,DUSP1,MIB1,CD86,PSMD1,CFLAR,ALOX5,NUP98,LCP2,IFNAR1,LDHA,mir-21,XRCC5,UBE2C,UBE2I,KPNA2,NUP214,FKBP1A,GALNT1,BECN1,NFKB1,NR3C1,SMARCA4,IDH1,DEF6,CD55,NOTCH2,ANXA1,F5,PMF1,CD22,CASP1,LPP,STAT5B,CD59,CD79B,MYD88,TUBA4A,PLCG1,VIM,I…
3h Male Disease And Finction (p<0.05)
Category	Diseases or Functions Annotation	p-Value	Predicted Activation State	Activation z-score	Notes	Molecules
Organismal Development	development of blood vessel	2.84E-02		1.826		B4GALT1,GAB1,METAP2,MIB1,RAP1A,RASA3,SMARCA4,UNC5B,VIM
Cardiovascular System Development and Function	development of blood vessel	2.84E-02		1.826		B4GALT1,GAB1,METAP2,MIB1,RAP1A,RASA3,SMARCA4,UNC5B,VIM
Organismal Development	vasculogenesis	3.74E-02		1.823		GAB1,METAP2,MIB1,RAP1A,RASA3,SMARCA4,UNC5B,VIM
Cardiovascular System Development and Function	vasculogenesis	3.74E-02		1.823		GAB1,METAP2,MIB1,RAP1A,RASA3,SMARCA4,UNC5B,VIM
Embryonic Development	size of embryo	3.21E-02		1.172	bias	ATP2C1,METAP2,MORF4L2,TFDP1,YY1
Cell Cycle	cell cycle progression	1.61E-02		1.154		B4GALT1,GAB1,HNRNPD,METAP2,NR3C1,PPP5C,PRMT5,RHOBTB2,SHOX,SMARCA4,TFDP1,YY1
Cancer	infection of tumor cell lines	3.21E-02		1.026		G3BP1,KPNA4,LYSMD1,MED31,PPP5C,TIMM8A,TM9SF2
Infectious Disease	infection of tumor cell lines	3.21E-02		1.026		G3BP1,KPNA4,LYSMD1,MED31,PPP5C,TIMM8A,TM9SF2
Cell Death and Survival	cell death of epithelial cells	2.82E-02		1.011		ATRX,MIB1,NR3C1,PPP5C,TRIM27,UNC5B
Cancer	infection of cervical cancer cell lines	4.78E-02		0.728	bias	KPNA4,LYSMD1,MED31,PPP5C,TIMM8A,TM9SF2
Infectious Disease	infection of cervical cancer cell lines	4.78E-02		0.728	bias	KPNA4,LYSMD1,MED31,PPP5C,TIMM8A,TM9SF2
Reproductive System Disease	infection of cervical cancer cell lines	4.78E-02		0.728	bias	KPNA4,LYSMD1,MED31,PPP5C,TIMM8A,TM9SF2
Cancer	cell transformation	1.16E-03		0.597		GAB1,MLLT10,NR3C1,PIK3R5,PRMT5,RAP1A,RCE1,TFDP1,YY1
Cell Death and Survival	apoptosis of epithelial cells	2.16E-02		0.577		ATRX,NR3C1,PPP5C,UNC5B
Cell Signaling	protein kinase cascade	2.87E-02		-0.152		ATP2C1,AZI2,BRAP,GAB1,PPP5C,TRAF7
Connective Tissue Disorders	exencephaly	3.24E-03		-1.000	bias	ATP2C1,SMARCA4,TFDP1,YY1
Developmental Disorder	exencephaly	3.24E-03		-1.000	bias	ATP2C1,SMARCA4,TFDP1,YY1
Neurological Disease	exencephaly	3.24E-03		-1.000	bias	ATP2C1,SMARCA4,TFDP1,YY1
Organismal Injury and Abnormalities	exencephaly	3.24E-03		-1.000	bias	ATP2C1,SMARCA4,TFDP1,YY1
Skeletal and Muscular Disorders	exencephaly	3.24E-03		-1.000	bias	ATP2C1,SMARCA4,TFDP1,YY1
Connective Tissue Disorders	craniofacial abnormality	1.06E-02		-1.000	bias	ATP2C1,SMARCA4,TFDP1,UBE2A,YY1
Developmental Disorder	craniofacial abnormality	1.06E-02		-1.000	bias	ATP2C1,SMARCA4,TFDP1,UBE2A,YY1
Skeletal and Muscular Disorders	craniofacial abnormality	1.06E-02		-1.000	bias	ATP2C1,SMARCA4,TFDP1,UBE2A,YY1
Connective Tissue Disorders	congenital anomaly of skeletal bone	1.68E-02		-1.000	bias	ATP2C1,SHOX,SMARCA4,TFDP1,UBE2A,YY1
Developmental Disorder	congenital anomaly of skeletal bone	1.68E-02		-1.000	bias	ATP2C1,SHOX,SMARCA4,TFDP1,UBE2A,YY1
Skeletal and Muscular Disorders	congenital anomaly of skeletal bone	1.68E-02		-1.000	bias	ATP2C1,SHOX,SMARCA4,TFDP1,UBE2A,YY1
Developmental Disorder	congenital anomaly of musculoskeletal system	3.18E-02		-1.000	bias	ATP2C1,NR3C1,SHOX,SMARCA4,TFDP1,UBE2A,YY1
Skeletal and Muscular Disorders	congenital anomaly of musculoskeletal system	3.18E-02		-1.000	bias	ATP2C1,NR3C1,SHOX,SMARCA4,TFDP1,UBE2A,YY1
Cell Death and Survival	apoptosis	3.50E-02		-1.030		ATP2C1,ATRX,AZI2,B4GALT1,CANX,GAB1,MIB1,NOA1,NR3C1,PPP5C,RAP1A,RHOBTB2,SHOX,SMARCA4,SRCIN1,TFDP1,TRAF7,TRIM27,TXNDC5,UNC5B,VIM,YY1
Cell Death and Survival	cell death of connective tissue cells	1.91E-02		-1.732		ATRX,GAB1,NR3C1,SHOX,TFDP1,TRAF7,UNC5B,VIM
Organismal Survival	organismal death	1.29E-03		-1.929	bias	ATP2C1,ATP5J2,B4GALT1,CANX,GAB1,GGCX,HNRNPD,METAP2,MGAT2,MIB1,MORF4L2,NOA1,NR3C1,PPP5C,RAP1A,RASA3,RCE1,SH3GL3,SMARCA4,STAM2,TFDP1,UBE2A,VDAC3,VIM,YY1
Cellular Assembly and Organization	disruption of nucleosomes	1.38E-04				NR3C1,SMARCA4
Cellular Compromise	disruption of nucleosomes	1.38E-04				NR3C1,SMARCA4
Organ Morphology	abnormal morphology of zona reticularis	2.29E-04				B4GALT1,NR3C1
Carbohydrate Metabolism	metabolism of D-galactose	3.43E-04				B4GALT1,GALK1
Small Molecule Biochemistry	metabolism of D-galactose	3.43E-04				B4GALT1,GALK1
Cellular Compromise	stress response of embryonic cell lines	8.15E-04				ALDH3A2,MGAT2
Post-Translational Modification	glycosylation of protein	1.02E-03				B4GALT1,CANX,MGAT2,RPN2
Organ Morphology	abnormal morphology of zona fasciculata	1.24E-03				B4GALT1,NR3C1
Cellular Compromise	stress response of epithelial cell lines	1.48E-03				ALDH3A2,MGAT2
Embryonic Development	development of epidermis	1.53E-03				ALDH3A2,ATP2C1,GAB1,SMARCA4,TFDP1
Hair and Skin Development and Function	development of epidermis	1.53E-03				ALDH3A2,ATP2C1,GAB1,SMARCA4,TFDP1
Organ Development	development of epidermis	1.53E-03				ALDH3A2,ATP2C1,GAB1,SMARCA4,TFDP1
Organismal Development	development of epidermis	1.53E-03				ALDH3A2,ATP2C1,GAB1,SMARCA4,TFDP1
Tissue Development	development of epidermis	1.53E-03				ALDH3A2,ATP2C1,GAB1,SMARCA4,TFDP1
Renal and Urological Disease	hematuria	1.74E-03				MGAT2,PSMD1
Cellular Compromise	stress response of kidney cell lines	1.74E-03				ALDH3A2,MGAT2
Embryonic Development	skin development	1.94E-03				ALDH3A2,ATP2C1,GAB1,NR3C1,SMARCA4,TFDP1
Hair and Skin Development and Function	skin development	1.94E-03				ALDH3A2,ATP2C1,GAB1,NR3C1,SMARCA4,TFDP1
Organ Development	skin development	1.94E-03				ALDH3A2,ATP2C1,GAB1,NR3C1,SMARCA4,TFDP1
Organismal Development	skin development	1.94E-03				ALDH3A2,ATP2C1,GAB1,NR3C1,SMARCA4,TFDP1
Tissue Development	skin development	1.94E-03				ALDH3A2,ATP2C1,GAB1,NR3C1,SMARCA4,TFDP1
Hematological System Development and Function	quantity of peripheral T lymphocyte	2.03E-03				NR3C1,SMARCA4
Tissue Morphology	quantity of peripheral T lymphocyte	2.03E-03				NR3C1,SMARCA4
Cellular Assembly and Organization	formation of nucleosomes	2.33E-03				METAP2,SMARCA4
DNA Replication, Recombination, and Repair	formation of nucleosomes	2.33E-03				METAP2,SMARCA4
Cellular Function and Maintenance	flux of Na+	3.37E-03				FXYD1,NR3C1
Molecular Transport	flux of Na+	3.37E-03				FXYD1,NR3C1
Post-Translational Modification	N-glycosylation of protein	3.75E-03				MGAT2,RPN2
Infectious Disease	activation of Retroviridae	3.75E-03				NR3C1,YY1
Cell Death and Survival	apoptosis of renal tubular epithelial cells	3.75E-03				PPP5C,UNC5B
Cancer	ACTH-secreting pituitary tumor	4.85E-03				NR3C1
Neurological Disease	ACTH-secreting pituitary tumor	4.85E-03				NR3C1
Endocrine System Disorders	ACTH-secreting pituitary tumor	4.85E-03				NR3C1
Reproductive System Disease	ACTH-secreting pituitary tumor	4.85E-03				NR3C1
Neurological Disease	Bell's palsy	4.85E-03				NR3C1
Cell Cycle	G2/M phase of Sertoli cells	4.85E-03				ATRX
Dermatological Diseases and Conditions	Hailey-Hailey disease	4.85E-03				ATP2C1
Hereditary Disorder	Hailey-Hailey disease	4.85E-03				ATP2C1
Neurological Disease	Mohr-Tranebjaerg syndrome	4.85E-03				TIMM8A
Auditory Disease	Mohr-Tranebjaerg syndrome	4.85E-03				TIMM8A
Hereditary Disorder	Mohr-Tranebjaerg syndrome	4.85E-03				TIMM8A
Ophthalmic Disease	Mohr-Tranebjaerg syndrome	4.85E-03				TIMM8A
Connective Tissue Disorders	Nascimento type syndromic X-linked mental retardation	4.85E-03				UBE2A
Developmental Disorder	Nascimento type syndromic X-linked mental retardation	4.85E-03				UBE2A
Neurological Disease	Nascimento type syndromic X-linked mental retardation	4.85E-03				UBE2A
Skeletal and Muscular Disorders	Nascimento type syndromic X-linked mental retardation	4.85E-03				UBE2A
Hereditary Disorder	Nascimento type syndromic X-linked mental retardation	4.85E-03				UBE2A
Developmental Disorder	X linked mental retardation-hypotonic facies syndrome	4.85E-03				ATRX
Neurological Disease	X linked mental retardation-hypotonic facies syndrome	4.85E-03				ATRX
Hereditary Disorder	X linked mental retardation-hypotonic facies syndrome	4.85E-03				ATRX
Organ Morphology	abnormal morphology of alveolar wall	4.85E-03				NR3C1
Embryonic Development	abnormal morphology of alveolar wall	4.85E-03				NR3C1
Organ Development	abnormal morphology of alveolar wall	4.85E-03				NR3C1
Organismal Development	abnormal morphology of alveolar wall	4.85E-03				NR3C1
Tissue Development	abnormal morphology of alveolar wall	4.85E-03				NR3C1
Respiratory System Development and Function	abnormal morphology of alveolar wall	4.85E-03				NR3C1
Hematological Disease	acquired hemoglobin h disease	4.85E-03				ATRX
Infectious Disease	activation of mouse mammary tumor virus	4.85E-03				NR3C1
Cancer	aggressive non-Hodgkin lymphoma	4.85E-03				NR3C1
Hematological Disease	aggressive non-Hodgkin lymphoma	4.85E-03				NR3C1
Infectious Disease	allergic bronchopulmonary aspergillosis	4.85E-03				NR3C1
Immunological Disease	allergic bronchopulmonary aspergillosis	4.85E-03				NR3C1
Inflammatory Disease	allergic bronchopulmonary aspergillosis	4.85E-03				NR3C1
Inflammatory Response	allergic bronchopulmonary aspergillosis	4.85E-03				NR3C1
Respiratory Disease	allergic bronchopulmonary aspergillosis	4.85E-03				NR3C1
Developmental Disorder	alpha thalassemia-mental retardation syndrome	4.85E-03				ATRX
Neurological Disease	alpha thalassemia-mental retardation syndrome	4.85E-03				ATRX
Hematological Disease	alpha thalassemia-mental retardation syndrome	4.85E-03				ATRX
Hereditary Disorder	alpha thalassemia-mental retardation syndrome	4.85E-03				ATRX
Cell Cycle	aneuploidy of spermatocytes	4.85E-03				YY1
Organismal Development	area of left common carotid artery	4.85E-03				VIM
Tissue Morphology	area of left common carotid artery	4.85E-03				VIM
Cardiovascular System Development and Function	area of left common carotid artery	4.85E-03				VIM
Organismal Development	area of right common carotid artery	4.85E-03				VIM
Tissue Morphology	area of right common carotid artery	4.85E-03				VIM
Cardiovascular System Development and Function	area of right common carotid artery	4.85E-03				VIM
Cell Cycle	arrest in cell cycle progression of chondrocytes	4.85E-03				SHOX
Connective Tissue Development and Function	arrest in cell cycle progression of chondrocytes	4.85E-03				SHOX
Cell Cycle	arrest in cell cycle progression of osteoblasts	4.85E-03				SHOX
Developmental Disorder	autosomal dominant mental retardation type 16	4.85E-03				SMARCA4
Neurological Disease	autosomal dominant mental retardation type 16	4.85E-03				SMARCA4
Hereditary Disorder	autosomal dominant mental retardation type 16	4.85E-03				SMARCA4
Developmental Disorder	autosomal dominant pulverulent cataract	4.85E-03				VIM
Hereditary Disorder	autosomal dominant pulverulent cataract	4.85E-03				VIM
Ophthalmic Disease	autosomal dominant pulverulent cataract	4.85E-03				VIM
Cell Morphology	cell flattening of breast cancer cell lines	4.85E-03				SMARCA4
Cell Morphology	cell flattening of prostate cancer cell lines	4.85E-03				SMARCA4
Cell Death and Survival	cell viability of mesothelial cells	4.85E-03				METAP2
Cancer	chalazion	4.85E-03				NR3C1
Organismal Injury and Abnormalities	chalazion	4.85E-03				NR3C1
Developmental Disorder	congenital disorder of glycosylation type 2d	4.85E-03				B4GALT1
Hereditary Disorder	congenital disorder of glycosylation type 2d	4.85E-03				B4GALT1
Metabolic Disease	congenital disorder of glycosylation type 2d	4.85E-03				B4GALT1
Developmental Disorder	congenital disorders of glycosylation type 2a	4.85E-03				MGAT2
Hereditary Disorder	congenital disorders of glycosylation type 2a	4.85E-03				MGAT2
Metabolic Disease	congenital disorders of glycosylation type 2a	4.85E-03				MGAT2
Cell Cycle	contact growth inhibition of fibroblast-like synoviocytes	4.85E-03				METAP2
Cell-To-Cell Signaling and Interaction	contact growth inhibition of fibroblast-like synoviocytes	4.85E-03				METAP2
Cellular Growth and Proliferation	contact growth inhibition of fibroblast-like synoviocytes	4.85E-03				METAP2
Connective Tissue Development and Function	contact growth inhibition of fibroblast-like synoviocytes	4.85E-03				METAP2
Immunological Disease	contact hypersensitivity of tissue	4.85E-03				B4GALT1
Inflammatory Disease	cyclitis	4.85E-03				NR3C1
Ophthalmic Disease	cyclitis	4.85E-03				NR3C1
Hereditary Disorder	deficiency of galactokinase	4.85E-03				GALK1
Metabolic Disease	deficiency of galactokinase	4.85E-03				GALK1
Embryonic Development	delay in cell cycle progression of embryonic cell lines	4.85E-03				TFDP1
Cell Cycle	delay in cell cycle progression of embryonic cell lines	4.85E-03				TFDP1
Cell Cycle	delay in cell cycle progression of kidney cell lines	4.85E-03				TFDP1
Renal and Urological System Development and Function	delay in cell cycle progression of kidney cell lines	4.85E-03				TFDP1
Embryonic Development	delay in development of mammary lobuloalveolar unit	4.85E-03				NR3C1
Organ Development	delay in development of mammary lobuloalveolar unit	4.85E-03				NR3C1
Organismal Development	delay in development of mammary lobuloalveolar unit	4.85E-03				NR3C1
Tissue Development	delay in development of mammary lobuloalveolar unit	4.85E-03				NR3C1
Reproductive System Development and Function	delay in development of mammary lobuloalveolar unit	4.85E-03				NR3C1
Cellular Development	delay in initiation of differentiation of hippocampal neurons	4.85E-03				ATP2C1
Nervous System Development and Function	delay in initiation of differentiation of hippocampal neurons	4.85E-03				ATP2C1
Cellular Development	delay in initiation of differentiation of neuroblastoma cell lines	4.85E-03				ATP2C1
Organ Morphology	delay in involution of thymus gland	4.85E-03				NR3C1
Tissue Development	delay in involution of thymus gland	4.85E-03				NR3C1
Cellular Compromise	depletion of basal cells	4.85E-03				TIMM8A
Nervous System Development and Function	development of dura mater	4.85E-03				NR3C1
Embryonic Development	development of flexor muscle	4.85E-03				GAB1
Organ Development	development of flexor muscle	4.85E-03				GAB1
Organismal Development	development of flexor muscle	4.85E-03				GAB1
Tissue Development	development of flexor muscle	4.85E-03				GAB1
Skeletal and Muscular System Development and Function	development of flexor muscle	4.85E-03				GAB1
Tissue Morphology	diameter of left common carotid artery	4.85E-03				VIM
Cardiovascular System Development and Function	diameter of left common carotid artery	4.85E-03				VIM
Tissue Morphology	diameter of right common carotid artery	4.85E-03				VIM
Cardiovascular System Development and Function	diameter of right common carotid artery	4.85E-03				VIM
Cellular Assembly and Organization	disruption of chromatin structures	4.85E-03				NR3C1
Cellular Compromise	disruption of chromatin structures	4.85E-03				NR3C1
Cellular Assembly and Organization	disruption of vimentin filaments	4.85E-03				VIM
Cellular Compromise	disruption of vimentin filaments	4.85E-03				VIM
Connective Tissue Disorders	edema of pericardium	4.85E-03				MIB1
Organismal Injury and Abnormalities	edema of pericardium	4.85E-03				MIB1
Molecular Transport	entrance of H+	4.85E-03				ATP5J2
Hematological Disease	eosinophilic pneumonia	4.85E-03				NR3C1
Immunological Disease	eosinophilic pneumonia	4.85E-03				NR3C1
Inflammatory Disease	eosinophilic pneumonia	4.85E-03				NR3C1
Inflammatory Response	eosinophilic pneumonia	4.85E-03				NR3C1
Respiratory Disease	eosinophilic pneumonia	4.85E-03				NR3C1
Embryonic Development	expansion of chorion	4.85E-03				TFDP1
Tissue Development	expansion of chorion	4.85E-03				TFDP1
Tissue Morphology	expansion of chorion	4.85E-03				TFDP1
Embryonic Development	expansion of ectoplacental cone	4.85E-03				TFDP1
Tissue Development	expansion of ectoplacental cone	4.85E-03				TFDP1
Tissue Morphology	expansion of ectoplacental cone	4.85E-03				TFDP1
Cellular Assembly and Organization	extension of filopodial tip	4.85E-03				UNC5B
Cellular Function and Maintenance	extension of filopodial tip	4.85E-03				UNC5B
Cell Morphology	extension of filopodial tip	4.85E-03				UNC5B
Endocrine System Disorders	familial glucocorticoid resistance	4.85E-03				NR3C1
Hereditary Disorder	familial glucocorticoid resistance	4.85E-03				NR3C1
Cellular Assembly and Organization	formation of microtentacles	4.85E-03				VIM
Cellular Function and Maintenance	formation of microtentacles	4.85E-03				VIM
Cell Morphology	formation of microtentacles	4.85E-03				VIM
Embryonic Development	formation of mylohyoid muscle	4.85E-03				VIM
Organ Development	formation of mylohyoid muscle	4.85E-03				VIM
Organismal Development	formation of mylohyoid muscle	4.85E-03				VIM
Tissue Development	formation of mylohyoid muscle	4.85E-03				VIM
Skeletal and Muscular System Development and Function	formation of mylohyoid muscle	4.85E-03				VIM
Embryonic Development	formation of second branchial arch	4.85E-03				MIB1
Organismal Development	formation of second branchial arch	4.85E-03				MIB1
Tissue Development	formation of second branchial arch	4.85E-03				MIB1
Gastrointestinal Disease	gastrointestinal graft-versus host disease	4.85E-03				NR3C1
Immunological Disease	gastrointestinal graft-versus host disease	4.85E-03				NR3C1
Endocrine System Development and Function	hyperactivation of hypothalamus-pituitary-adrenal axis	4.85E-03				NR3C1
Developmental Disorder	hypoplasia of germ cells	4.85E-03				ATRX
Reproductive System Disease	hypoplasia of germ cells	4.85E-03				ATRX
Infectious Disease	infection of monocyte-derived macrophages	4.85E-03				KPNA4
Hematological Disease	infection of monocyte-derived macrophages	4.85E-03				KPNA4
Immunological Disease	infection of monocyte-derived macrophages	4.85E-03				KPNA4
Cancer	invasion of papillary thyroid carcinoma	4.85E-03				VIM
Tumor Morphology	invasion of papillary thyroid carcinoma	4.85E-03				VIM
Neurological Disease	jensen syndrome	4.85E-03				TIMM8A
Hereditary Disorder	jensen syndrome	4.85E-03				TIMM8A
Organ Morphology	lack of adrenal medulla	4.85E-03				NR3C1
Connective Tissue Disorders	langer mesomelic dysplasia syndrome	4.85E-03				SHOX
Developmental Disorder	langer mesomelic dysplasia syndrome	4.85E-03				SHOX
Skeletal and Muscular Disorders	langer mesomelic dysplasia syndrome	4.85E-03				SHOX
Hereditary Disorder	langer mesomelic dysplasia syndrome	4.85E-03				SHOX
Developmental Disorder	leri-weill dyschondrosteosis	4.85E-03				SHOX
Skeletal and Muscular Disorders	leri-weill dyschondrosteosis	4.85E-03				SHOX
Hereditary Disorder	leri-weill dyschondrosteosis	4.85E-03				SHOX
Cancer	medullary breast carcinoma	4.85E-03				NR3C1
Carbohydrate Metabolism	metabolism of galactitol	4.85E-03				GALK1
Small Molecule Biochemistry	metabolism of galactitol	4.85E-03				GALK1
Cancer	metastasis of papillary thyroid carcinoma	4.85E-03				VIM
Cellular Assembly and Organization	morphology of nuclear matrix	4.85E-03				VIM
DNA Replication, Recombination, and Repair	morphology of nuclear matrix	4.85E-03				VIM
Cell Morphology	morphology of nuclear matrix	4.85E-03				VIM
Neurological Disease	myopathy, lactic acidosis, and sideroblastic anemia type 2	4.85E-03				YARS2
Skeletal and Muscular Disorders	myopathy, lactic acidosis, and sideroblastic anemia type 2	4.85E-03				YARS2
Cardiovascular Disease	myopathy, lactic acidosis, and sideroblastic anemia type 2	4.85E-03				YARS2
Hematological Disease	myopathy, lactic acidosis, and sideroblastic anemia type 2	4.85E-03				YARS2
Hereditary Disorder	myopathy, lactic acidosis, and sideroblastic anemia type 2	4.85E-03				YARS2
Metabolic Disease	myopathy, lactic acidosis, and sideroblastic anemia type 2	4.85E-03				YARS2
Endocrine System Disorders	nonsuppurative thyroiditis	4.85E-03				NR3C1
Inflammatory Disease	nonsuppurative thyroiditis	4.85E-03				NR3C1
Embryonic Development	opening of neural tube	4.85E-03				ATP2C1
Tissue Morphology	opening of neural tube	4.85E-03				ATP2C1
Gastrointestinal Disease	oral manifestation	4.85E-03				NR3C1
Cellular Compromise	oxidative stress response of embryonic cell lines	4.85E-03				ALDH3A2
Embryonic Development	oxidative stress response of embryonic cell lines	4.85E-03				ALDH3A2
Connective Tissue Disorders	pseudoxanthoma elasticum-like disorder with multiple coagulation factor deficiency	4.85E-03				GGCX
Hereditary Disorder	pseudoxanthoma elasticum-like disorder with multiple coagulation factor deficiency	4.85E-03				GGCX
Hematological Disease	pure red cell aplasia	4.85E-03				NR3C1
Cell Death and Survival	quantity of apoptotic granulocytes	4.85E-03				SRCIN1
Cell Cycle	re-entry into cell cycle progression of myotube	4.85E-03				TFDP1
Skeletal and Muscular System Development and Function	re-entry into cell cycle progression of myotube	4.85E-03				TFDP1
Cell Death and Survival	recovery of oocytes	4.85E-03				PPP5C
Cancer	rhabdoid tumor predisposition syndrome type 2	4.85E-03				SMARCA4
Renal and Urological Disease	rhabdoid tumor predisposition syndrome type 2	4.85E-03				SMARCA4
Neurological Disease	rhabdoid tumor predisposition syndrome type 2	4.85E-03				SMARCA4
Hereditary Disorder	rhabdoid tumor predisposition syndrome type 2	4.85E-03				SMARCA4
Immunological Disease	serum sickness	4.85E-03				NR3C1
Developmental Disorder	sjogren-larsson syndrome	4.85E-03				ALDH3A2
Hereditary Disorder	sjogren-larsson syndrome	4.85E-03				ALDH3A2
Metabolic Disease	sjogren-larsson syndrome	4.85E-03				ALDH3A2
Inflammatory Disease	sympathetic uveitis	4.85E-03				NR3C1
Ophthalmic Disease	sympathetic uveitis	4.85E-03				NR3C1
Cancer	transformation of fibrosarcoma cell lines	4.85E-03				RAP1A
DNA Replication, Recombination, and Repair	unwinding of nucleosomes	4.85E-03				NR3C1
Cell Cycle	interphase of connective tissue cells	5.31E-03				ATRX,GAB1,TFDP1
Cell Cycle	cell cycle progression of lung cancer cell lines	5.96E-03				RHOBTB2,SMARCA4
DNA Replication, Recombination, and Repair	synthesis of genomic DNA	5.96E-03				RAP1A,SMARCA4
Endocrine System Disorders	hypocalcemia	6.46E-03				MGAT2,STX16
Hematological Disease	hypocalcemia	6.46E-03				MGAT2,STX16
Developmental Disorder	syndromic X-linked mental retardation	6.97E-03				ATRX,UBE2A
Neurological Disease	syndromic X-linked mental retardation	6.97E-03				ATRX,UBE2A
Hereditary Disorder	syndromic X-linked mental retardation	6.97E-03				ATRX,UBE2A
Cardiovascular Disease	thrombosis of vein	6.97E-03				GGCX,NR3C1
Hematological Disease	thrombosis of vein	6.97E-03				GGCX,NR3C1
Cell Cycle	arrest in cell cycle progression of connective tissue cells	7.51E-03				SHOX,YY1
Hematological System Development and Function	function of neutrophils	7.58E-03				B4GALT1,RAP1A,UNC5B
Cellular Function and Maintenance	function of neutrophils	7.58E-03				B4GALT1,RAP1A,UNC5B
Organismal Survival	viability	8.10E-03				SMARCA4,UBE2A,YY1
Cell Death and Survival	recovery of cells	9.22E-03				GAB1,PPP5C
Cancer	21-hydroxylase deficiency	9.67E-03				NR3C1
Developmental Disorder	21-hydroxylase deficiency	9.67E-03				NR3C1
Endocrine System Disorders	21-hydroxylase deficiency	9.67E-03				NR3C1
Hereditary Disorder	21-hydroxylase deficiency	9.67E-03				NR3C1
Metabolic Disease	21-hydroxylase deficiency	9.67E-03				NR3C1
Cancer	Carney complex type 1	9.67E-03				VIM
Cardiovascular Disease	Carney complex type 1	9.67E-03				VIM
Dermatological Diseases and Conditions	Carney complex type 1	9.67E-03				VIM
Hereditary Disorder	Carney complex type 1	9.67E-03				VIM
Cardiovascular Disease	HELLP syndrome	9.67E-03				NR3C1
Hematological Disease	HELLP syndrome	9.67E-03				NR3C1
Infectious Disease	Pneumocystosis jiroveci pneumonia	9.67E-03				NR3C1
Inflammatory Response	Pneumocystosis jiroveci pneumonia	9.67E-03				NR3C1
Respiratory Disease	Pneumocystosis jiroveci pneumonia	9.67E-03				NR3C1
Cell Morphology	abnormal morphology of long-lived plasma cell	9.67E-03				CD84
Humoral Immune Response	abnormal morphology of long-lived plasma cell	9.67E-03				CD84
Tissue Morphology	area of endothelial tube	9.67E-03				YY1
Cellular Development	arrest in growth of hepatoma cell lines	9.67E-03				NR3C1
Cellular Growth and Proliferation	arrest in growth of hepatoma cell lines	9.67E-03				NR3C1
Inflammatory Response	aspiration pneumonitis	9.67E-03				NR3C1
Respiratory Disease	aspiration pneumonitis	9.67E-03				NR3C1
Post-Translational Modification	binding of glycoprotein	9.67E-03				B4GALT1
Small Molecule Biochemistry	binding of hydrocortisone	9.67E-03				NR3C1
Endocrine System Development and Function	binding of hydrocortisone	9.67E-03				NR3C1
Drug Metabolism	binding of hydrocortisone	9.67E-03				NR3C1
Lipid Metabolism	binding of hydrocortisone	9.67E-03				NR3C1
Infectious Disease	binding of mouse mammary tumor virus	9.67E-03				NR3C1
Cellular Assembly and Organization	binding of nucleus	9.67E-03				SMARCA4
Cell Morphology	cell flattening of carcinoma cell lines	9.67E-03				SMARCA4
Developmental Disorder	congenital combined deficiency of vitamin K-dependent coagulation factors	9.67E-03				GGCX
Hematological Disease	congenital combined deficiency of vitamin K-dependent coagulation factors	9.67E-03				GGCX
Inflammatory Disease	cystoid macular edema	9.67E-03				NR3C1
Ophthalmic Disease	cystoid macular edema	9.67E-03				NR3C1
Cell Cycle	delay in initiation of G1/S phase transition of fibroblast cell lines	9.67E-03				TFDP1
Connective Tissue Development and Function	delay in initiation of G1/S phase transition of fibroblast cell lines	9.67E-03				TFDP1
Dermatological Diseases and Conditions	dermatitis herpetiformis	9.67E-03				NR3C1
Immunological Disease	dermatitis herpetiformis	9.67E-03				NR3C1
Inflammatory Disease	dermatitis herpetiformis	9.67E-03				NR3C1
Inflammatory Response	dermatitis herpetiformis	9.67E-03				NR3C1
Embryonic Development	development of chromaffin cells	9.67E-03				NR3C1
Organ Development	development of chromaffin cells	9.67E-03				NR3C1
Organismal Development	development of chromaffin cells	9.67E-03				NR3C1
Tissue Development	development of chromaffin cells	9.67E-03				NR3C1
Cellular Development	development of chromaffin cells	9.67E-03				NR3C1
Endocrine System Development and Function	development of chromaffin cells	9.67E-03				NR3C1
Embryonic Development	development of extensor muscle	9.67E-03				GAB1
Organ Development	development of extensor muscle	9.67E-03				GAB1
Organismal Development	development of extensor muscle	9.67E-03				GAB1
Tissue Development	development of extensor muscle	9.67E-03				GAB1
Skeletal and Muscular System Development and Function	development of extensor muscle	9.67E-03				GAB1
Cellular Compromise	disassembly of intermediate filaments	9.67E-03				VIM
Cellular Assembly and Organization	exocytosis of cortical granules	9.67E-03				B4GALT1
Cellular Function and Maintenance	exocytosis of cortical granules	9.67E-03				B4GALT1
Molecular Transport	exocytosis of cortical granules	9.67E-03				B4GALT1
Cellular Assembly and Organization	formation of punctate structures	9.67E-03				VIM
Cancer	frequency of papilloma	9.67E-03				NR3C1
Cell-To-Cell Signaling and Interaction	gap junctional intercellular communication of neuronal progenitor cells	9.67E-03				NR3C1
Carbohydrate Metabolism	glycosylation of carbohydrate	9.67E-03				B4GALT1
Organismal Functions	healing of cornea	9.67E-03				VIM
Endocrine System Disorders	hyperandrogeny	9.67E-03				NR3C1
Reproductive System Disease	hyperandrogeny	9.67E-03				NR3C1
Developmental Disorder	hypertrophy of adrenal cortex	9.67E-03				NR3C1
Endocrine System Disorders	hypertrophy of adrenal cortex	9.67E-03				NR3C1
Dermatological Diseases and Conditions	immune thrombocytopenic purpura	9.67E-03				NR3C1
Hematological Disease	immune thrombocytopenic purpura	9.67E-03				NR3C1
Immunological Disease	immune thrombocytopenic purpura	9.67E-03				NR3C1
Carbohydrate Metabolism	import of UDP-galactose	9.67E-03				B4GALT1
Small Molecule Biochemistry	import of UDP-galactose	9.67E-03				B4GALT1
Molecular Transport	import of UDP-galactose	9.67E-03				B4GALT1
Nucleic Acid Metabolism	import of UDP-galactose	9.67E-03				B4GALT1
Cellular Growth and Proliferation	inhibition of glioma cells	9.67E-03				YY1
Tumor Morphology	inhibition of glioma cells	9.67E-03				YY1
Organ Morphology	lack of chromaffin cells	9.67E-03				NR3C1
Cell Morphology	lack of chromaffin cells	9.67E-03				NR3C1
Endocrine System Development and Function	lack of chromaffin cells	9.67E-03				NR3C1
Small Molecule Biochemistry	metabolism of formaldehyde	9.67E-03				ALDH3A2
Cellular Movement	migration of AT2 cells	9.67E-03				VIM
Respiratory Disease	nasal obstruction	9.67E-03				NR3C1
Cell Cycle	neurite outgrowth stage of dorsal root ganglion cells	9.67E-03				VIM
Cellular Compromise	oxidative stress response of epithelial cell lines	9.67E-03				ALDH3A2
Tissue Morphology	permeability of skin tissue	9.67E-03				NR3C1
Cellular Assembly and Organization	quantity of Golgi vesicles	9.67E-03				ATP2C1
Cellular Assembly and Organization	quantity of ribosome	9.67E-03				ATP2C1
Cell-To-Cell Signaling and Interaction	reactivation of astrocytes	9.67E-03				VIM
Nervous System Development and Function	reactivation of astrocytes	9.67E-03				VIM
Cellular Assembly and Organization	rearrangement of chromatin	9.67E-03				NR3C1
DNA Replication, Recombination, and Repair	rearrangement of chromatin	9.67E-03				NR3C1
Cellular Assembly and Organization	retraction of filopodial tip	9.67E-03				UNC5B
Cellular Compromise	retraction of filopodial tip	9.67E-03				UNC5B
Tissue Morphology	volume of fibroblast cell lines	9.67E-03				SMARCA4
Cell Morphology	volume of fibroblast cell lines	9.67E-03				SMARCA4
Cellular Growth and Proliferation	volume of fibroblast cell lines	9.67E-03				SMARCA4
Connective Tissue Development and Function	volume of fibroblast cell lines	9.67E-03				SMARCA4
Hematological System Development and Function	cell viability of thymocytes	1.04E-02				SMARCA4,STAM2
Cell Death and Survival	cell viability of thymocytes	1.04E-02				SMARCA4,STAM2
Small Molecule Biochemistry	catabolism of ATP	1.07E-02				ATP2C1,ATP5J2,SMARCA4
DNA Replication, Recombination, and Repair	catabolism of ATP	1.07E-02				ATP2C1,ATP5J2,SMARCA4
Nucleic Acid Metabolism	catabolism of ATP	1.07E-02				ATP2C1,ATP5J2,SMARCA4
Energy Production	catabolism of ATP	1.07E-02				ATP2C1,ATP5J2,SMARCA4
Cancer	plasma cell dyscrasia	1.08E-02				G3BP1,NR3C1,PSMD1,TFDP1,VIM
Hematological Disease	plasma cell dyscrasia	1.08E-02				G3BP1,NR3C1,PSMD1,TFDP1,VIM
Immunological Disease	plasma cell dyscrasia	1.08E-02				G3BP1,NR3C1,PSMD1,TFDP1,VIM
Developmental Disorder	congenital disorders of glycosylation	1.17E-02				B4GALT1,MGAT2
Hereditary Disorder	congenital disorders of glycosylation	1.17E-02				B4GALT1,MGAT2
Metabolic Disease	congenital disorders of glycosylation	1.17E-02				B4GALT1,MGAT2
Developmental Disorder	mental retardation	1.19E-02				ATRX,SMARCA4,UBE2A,YY1
Neurological Disease	mental retardation	1.19E-02				ATRX,SMARCA4,UBE2A,YY1
Organ Morphology	abnormal morphology of adrenal gland	1.24E-02				B4GALT1,NR3C1
Neurological Disease	mitochondrial cytopathy	1.24E-02				NDUFA9,YARS2
Skeletal and Muscular Disorders	mitochondrial cytopathy	1.24E-02				NDUFA9,YARS2
Cardiovascular Disease	mitochondrial cytopathy	1.24E-02				NDUFA9,YARS2
Metabolic Disease	mitochondrial cytopathy	1.24E-02				NDUFA9,YARS2
Cancer	gastric carcinoma	1.29E-02				CANX,NR3C1,SYCP1
Gastrointestinal Disease	gastric carcinoma	1.29E-02				CANX,NR3C1,SYCP1
Organ Morphology	abnormal morphology of interalveolar septa	1.31E-02				B4GALT1,NR3C1
Embryonic Development	abnormal morphology of interalveolar septa	1.31E-02				B4GALT1,NR3C1
Organ Development	abnormal morphology of interalveolar septa	1.31E-02				B4GALT1,NR3C1
Organismal Development	abnormal morphology of interalveolar septa	1.31E-02				B4GALT1,NR3C1
Tissue Development	abnormal morphology of interalveolar septa	1.31E-02				B4GALT1,NR3C1
Respiratory System Development and Function	abnormal morphology of interalveolar septa	1.31E-02				B4GALT1,NR3C1
Cancer	multiple myeloma	1.33E-02				NR3C1,PSMD1,VIM
Hematological Disease	multiple myeloma	1.33E-02				NR3C1,PSMD1,VIM
Immunological Disease	multiple myeloma	1.33E-02				NR3C1,PSMD1,VIM
Cellular Assembly and Organization	abnormal morphology of mitochondria	1.38E-02				NOA1,VDAC3
Cell Morphology	abnormal morphology of mitochondria	1.38E-02				NOA1,VDAC3
Cell Cycle	G1/S phase transition of kidney cell lines	1.45E-02				TFDP1
Renal and Urological System Development and Function	G1/S phase transition of kidney cell lines	1.45E-02				TFDP1
Neurological Disease	Meniere's disease	1.45E-02				NR3C1
Auditory Disease	Meniere's disease	1.45E-02				NR3C1
Organ Morphology	abnormal morphology of enlarged adrenocortical cells	1.45E-02				NR3C1
Cell Morphology	abnormal morphology of enlarged adrenocortical cells	1.45E-02				NR3C1
Endocrine System Development and Function	abnormal morphology of enlarged adrenocortical cells	1.45E-02				NR3C1
Cell Morphology	area of fibroblast cell lines	1.45E-02				SMARCA4
Cellular Growth and Proliferation	area of fibroblast cell lines	1.45E-02				SMARCA4
Connective Tissue Development and Function	area of fibroblast cell lines	1.45E-02				SMARCA4
Cell Cycle	arrest in cell cycle progression of bone marrow cell lines	1.45E-02				TFDP1
Connective Tissue Disorders	berylliosis	1.45E-02				NR3C1
Respiratory Disease	berylliosis	1.45E-02				NR3C1
Gene Expression	binding of NF-Y binding site	1.45E-02				YY1
Tissue Development	cell-cell contact of kidney cell lines	1.45E-02				RAP1A
Cell-To-Cell Signaling and Interaction	cell-cell contact of kidney cell lines	1.45E-02				RAP1A
Renal and Urological System Development and Function	cell-cell contact of kidney cell lines	1.45E-02				RAP1A
Neurological Disease	cerebral edema	1.45E-02				NR3C1
Organismal Injury and Abnormalities	cerebral edema	1.45E-02				NR3C1
Cellular Growth and Proliferation	cytostasis of hepatoma cell lines	1.45E-02				NR3C1
Hair and Skin Development and Function	delay in cell cycle progression of epithelial cell lines	1.45E-02				TFDP1
Cell Cycle	delay in cell cycle progression of epithelial cell lines	1.45E-02				TFDP1
Hematological System Development and Function	development of pre-pro-B lymphocytes	1.45E-02				SMARCA4
Cellular Development	development of pre-pro-B lymphocytes	1.45E-02				SMARCA4
Humoral Immune Response	development of pre-pro-B lymphocytes	1.45E-02				SMARCA4
Hematopoiesis	development of pre-pro-B lymphocytes	1.45E-02				SMARCA4
Lymphoid Tissue Structure and Development	development of pre-pro-B lymphocytes	1.45E-02				SMARCA4
Connective Tissue Disorders	endocardial fibroelastosis	1.45E-02				GAB1
Cardiovascular Disease	endocardial fibroelastosis	1.45E-02				GAB1
Embryonic Development	endoreduplication of trophoblast giant cells	1.45E-02				TFDP1
Organismal Development	endoreduplication of trophoblast giant cells	1.45E-02				TFDP1
Cell Cycle	endoreduplication of trophoblast giant cells	1.45E-02				TFDP1
Hematological Disease	erythroblastopenia anemia	1.45E-02				NR3C1
Cellular Growth and Proliferation	formation of carcinoma cell lines	1.45E-02				SMARCA4
Hair and Skin Development and Function	formation of epidermis	1.45E-02				TFDP1
Organ Development	formation of epidermis	1.45E-02				TFDP1
Tissue Development	growth of focal adhesions	1.45E-02				VIM
Cell-To-Cell Signaling and Interaction	growth of focal adhesions	1.45E-02				VIM
Cellular Compromise	infectibility of cells	1.45E-02				YY1
Tissue Morphology	length of endothelial tube	1.45E-02				YY1
Cardiovascular System Development and Function	length of endothelial tube	1.45E-02				YY1
Cellular Assembly and Organization	phagocytosis of particle	1.45E-02				NR3C1
Cellular Function and Maintenance	phagocytosis of particle	1.45E-02				NR3C1
Inflammatory Response	phagocytosis of particle	1.45E-02				NR3C1
Connective Tissue Disorders	polymyalgia rheumatica	1.45E-02				NR3C1
Skeletal and Muscular Disorders	polymyalgia rheumatica	1.45E-02				NR3C1
Inflammatory Disease	polymyalgia rheumatica	1.45E-02				NR3C1
Neurological Disease	positive geotaxis	1.45E-02				CANX
Behavior	positive geotaxis	1.45E-02				CANX
Connective Tissue Disorders	post-traumatic arthritis	1.45E-02				NR3C1
Skeletal and Muscular Disorders	post-traumatic arthritis	1.45E-02				NR3C1
Inflammatory Disease	post-traumatic arthritis	1.45E-02				NR3C1
Developmental Disorder	pseudohypoparathyroidism type 1B	1.45E-02				STX16
Endocrine System Disorders	pseudohypoparathyroidism type 1B	1.45E-02				STX16
Hematological Disease	pseudohypoparathyroidism type 1B	1.45E-02				STX16
Hereditary Disorder	pseudohypoparathyroidism type 1B	1.45E-02				STX16
Metabolic Disease	pseudohypoparathyroidism type 1B	1.45E-02				STX16
Tissue Morphology	quantity of AT2 cells	1.45E-02				NR3C1
Respiratory System Development and Function	quantity of AT2 cells	1.45E-02				NR3C1
Tissue Morphology	quantity of alveolar type I cells	1.45E-02				NR3C1
Respiratory System Development and Function	quantity of alveolar type I cells	1.45E-02				NR3C1
Cancer	quantity of squamous-cell carcinoma	1.45E-02				ATP2C1
Cellular Function and Maintenance	release of spermatids	1.45E-02				RAP1A
Reproductive System Development and Function	release of spermatids	1.45E-02				RAP1A
Cellular Movement	release of spermatids	1.45E-02				RAP1A
Cardiovascular Disease	rheumatic carditis	1.45E-02				NR3C1
Inflammatory Disease	rheumatic carditis	1.45E-02				NR3C1
Neurological Disease	sciatica	1.45E-02				NR3C1
Organismal Injury and Abnormalities	sciatica	1.45E-02				NR3C1
Organ Morphology	size of forebrain	1.45E-02				ATRX
Nervous System Development and Function	size of forebrain	1.45E-02				ATRX
Hair and Skin Development and Function	size of keratinocytes	1.45E-02				NR3C1
Cell Morphology	size of keratinocytes	1.45E-02				NR3C1
Carbohydrate Metabolism	synthesis of lactose	1.45E-02				B4GALT1
Small Molecule Biochemistry	synthesis of lactose	1.45E-02				B4GALT1
Cardiovascular Disease	thickening of tunica intima	1.45E-02				YY1
Infectious Disease	tinea cruris	1.45E-02				NR3C1
Dermatological Diseases and Conditions	tinea cruris	1.45E-02				NR3C1
Neurological Disease	tuberculosis meningitis	1.45E-02				NR3C1
Infectious Disease	tuberculosis meningitis	1.45E-02				NR3C1
Inflammatory Disease	tuberculosis meningitis	1.45E-02				NR3C1
Post-Translational Modification	ubiquitination of Histone h2a	1.45E-02				UBE2A
Infectious Disease	viral pneumonia	1.45E-02				NR3C1
Inflammatory Response	viral pneumonia	1.45E-02				NR3C1
Respiratory Disease	viral pneumonia	1.45E-02				NR3C1
Cell Death and Survival	apoptosis of connective tissue cells	1.56E-02				ATRX,GAB1,SHOX,TFDP1,VIM
Cell Cycle	S phase of fibroblasts	1.60E-02				GAB1,TFDP1
Connective Tissue Development and Function	S phase of fibroblasts	1.60E-02				GAB1,TFDP1
Cell-To-Cell Signaling and Interaction	synaptic transmission of cerebral cortex cells	1.60E-02				NR3C1,SH3GL3
Nervous System Development and Function	synaptic transmission of cerebral cortex cells	1.60E-02				NR3C1,SH3GL3
Tissue Development	differentiation of muscle	1.68E-02				TRAF7,TRIM27
Cellular Development	differentiation of muscle	1.68E-02				TRAF7,TRIM27
Skeletal and Muscular System Development and Function	differentiation of muscle	1.68E-02				TRAF7,TRIM27
Cellular Development	differentiation of fibroblasts	1.76E-02				SMARCA4,YY1
Connective Tissue Development and Function	differentiation of fibroblasts	1.76E-02				SMARCA4,YY1
Hereditary Disorder	Sex-Linked Hereditary Disorder	1.91E-02				ATRX,NR3C1,TIMM8A,UBE2A
Endocrine System Disorders	Addison's disease	1.92E-02				NR3C1
Endocrine System Disorders	adrenocorticotropic hormone (ACTH) deficiency	1.92E-02				NR3C1
Metabolic Disease	adrenocorticotropic hormone (ACTH) deficiency	1.92E-02				NR3C1
Reproductive System Disease	adrenocorticotropic hormone (ACTH) deficiency	1.92E-02				NR3C1
Cell Death and Survival	apoptosis of Sertoli cells	1.92E-02				ATRX
Cell Cycle	arrest in G1 phase of hepatoma cell lines	1.92E-02				NR3C1
Gene Expression	binding of MEF2-binding element	1.92E-02				SMARCA4
Small Molecule Biochemistry	binding of dexamethasone	1.92E-02				NR3C1
Endocrine System Development and Function	binding of dexamethasone	1.92E-02				NR3C1
Drug Metabolism	binding of dexamethasone	1.92E-02				NR3C1
Lipid Metabolism	binding of dexamethasone	1.92E-02				NR3C1
Gene Expression	binding of glucocorticoid response element	1.92E-02				NR3C1
Gene Expression	binding of octamer element	1.92E-02				NR3C1
Cellular Development	branching of breast cell lines	1.92E-02				GAB1
Reproductive System Development and Function	branching of breast cell lines	1.92E-02				GAB1
Organ Development	chronic autoimmune hepatitis	1.92E-02				NR3C1
Gastrointestinal Disease	chronic autoimmune hepatitis	1.92E-02				NR3C1
Immunological Disease	chronic autoimmune hepatitis	1.92E-02				NR3C1
Inflammatory Disease	chronic autoimmune hepatitis	1.92E-02				NR3C1
Inflammatory Response	chronic autoimmune hepatitis	1.92E-02				NR3C1
Digestive System Development and Function	chronic autoimmune hepatitis	1.92E-02				NR3C1
Hepatic System Development and Function	chronic autoimmune hepatitis	1.92E-02				NR3C1
Hepatic System Disease	chronic autoimmune hepatitis	1.92E-02				NR3C1
Cellular Development	commitment of neuroglia	1.92E-02				SMARCA4
Inflammatory Response	community acquired pneumonia	1.92E-02				NR3C1
Respiratory Disease	community acquired pneumonia	1.92E-02				NR3C1
Cardiovascular System Development and Function	contact growth inhibition of vascular endothelial cells	1.92E-02				METAP2
Cell Cycle	contact growth inhibition of vascular endothelial cells	1.92E-02				METAP2
Cell-To-Cell Signaling and Interaction	contact growth inhibition of vascular endothelial cells	1.92E-02				METAP2
Cellular Growth and Proliferation	contact growth inhibition of vascular endothelial cells	1.92E-02				METAP2
Cell Morphology	contraction of fibroblast cell lines	1.92E-02				VIM
Connective Tissue Development and Function	contraction of fibroblast cell lines	1.92E-02				VIM
Cell Cycle	cytokinesis of fibroblasts	1.92E-02				YY1
Connective Tissue Development and Function	cytokinesis of fibroblasts	1.92E-02				YY1
Cellular Movement	cytokinesis of fibroblasts	1.92E-02				YY1
Dermatological Diseases and Conditions	dermatosis	1.92E-02				NR3C1
Dermatological Diseases and Conditions	drug-induced hypersensitivity syndrome	1.92E-02				NR3C1
Hematological Disease	drug-induced hypersensitivity syndrome	1.92E-02				NR3C1
Immunological Disease	drug-induced hypersensitivity syndrome	1.92E-02				NR3C1
Infectious Disease	formation of HIV-1	1.92E-02				KPNA4
Cellular Assembly and Organization	formation of telomeres	1.92E-02				ATRX
DNA Replication, Recombination, and Repair	formation of telomeres	1.92E-02				ATRX
Renal and Urological Disease	hyperuricemia	1.92E-02				NR3C1
Developmental Disorder	hyperuricemia	1.92E-02				NR3C1
Hematological Disease	hyperuricemia	1.92E-02				NR3C1
Hereditary Disorder	hyperuricemia	1.92E-02				NR3C1
Metabolic Disease	hyperuricemia	1.92E-02				NR3C1
Nutritional Disease	hyperuricemia	1.92E-02				NR3C1
Cell Cycle	initiation of S phase of fibroblasts	1.92E-02				GAB1
Connective Tissue Development and Function	initiation of S phase of fibroblasts	1.92E-02				GAB1
Dermatological Diseases and Conditions	melasma	1.92E-02				NR3C1
Cellular Assembly and Organization	quantity of desmosomes	1.92E-02				NR3C1
Tissue Development	quantity of desmosomes	1.92E-02				NR3C1
Cell-To-Cell Signaling and Interaction	quantity of desmosomes	1.92E-02				NR3C1
DNA Replication, Recombination, and Repair	rearrangement of DNA	1.92E-02				SMARCA4
Cell-To-Cell Signaling and Interaction	recruitment of leukemia cell lines	1.92E-02				VIM
Cellular Movement	recruitment of leukemia cell lines	1.92E-02				VIM
Cell Cycle	replication of smooth muscle cells	1.92E-02				YY1
Skeletal and Muscular System Development and Function	replication of smooth muscle cells	1.92E-02				YY1
Cell-To-Cell Signaling and Interaction	suppression of tumor cells	1.92E-02				YY1
Cellular Growth and Proliferation	suppression of tumor cells	1.92E-02				YY1
Tumor Morphology	suppression of tumor cells	1.92E-02				YY1
Cell-To-Cell Signaling and Interaction	synaptic transmission of cortical neurons	1.92E-02				SH3GL3
Nervous System Development and Function	synaptic transmission of cortical neurons	1.92E-02				SH3GL3
Small Molecule Biochemistry	synthesis of galactosylceramide	1.92E-02				B4GALT1
Lipid Metabolism	synthesis of galactosylceramide	1.92E-02				B4GALT1
Carbohydrate Metabolism	tolerance of D-glucose	1.92E-02				GAB1
Small Molecule Biochemistry	tolerance of D-glucose	1.92E-02				GAB1
Cancer	volume of papilloma	1.92E-02				NR3C1
Tumor Morphology	volume of papilloma	1.92E-02				NR3C1
Gene Expression	induction of RNA	2.35E-02				AZI2,NR3C1
Cell Cycle	arrest in cell cycle progression	2.38E-02				NR3C1,SHOX,SMARCA4,TFDP1,YY1
Embryonic Development	G1/S phase transition of embryonic cell lines	2.40E-02				TFDP1
Cell Cycle	G1/S phase transition of embryonic cell lines	2.40E-02				TFDP1
Organ Morphology	abnormal morphology of chromaffin cells	2.40E-02				NR3C1
Cell Morphology	abnormal morphology of chromaffin cells	2.40E-02				NR3C1
Endocrine System Development and Function	abnormal morphology of chromaffin cells	2.40E-02				NR3C1
Cellular Compromise	acidification of endosomes	2.40E-02				VIM
Cell-To-Cell Signaling and Interaction	activation of oocytes	2.40E-02				B4GALT1
Reproductive System Development and Function	activation of oocytes	2.40E-02				B4GALT1
Embryonic Development	apoptosis of neural tube cells	2.40E-02				ATP2C1
Cell Death and Survival	apoptosis of neural tube cells	2.40E-02				ATP2C1
Cellular Compromise	atrophy of testicular cells	2.40E-02				TFDP1
Organismal Injury and Abnormalities	atrophy of testicular cells	2.40E-02				TFDP1
Developmental Disorder	bronchopulmonary dysplasia	2.40E-02				NR3C1
Respiratory Disease	bronchopulmonary dysplasia	2.40E-02				NR3C1
Cell Cycle	cell cycle progression of oocytes	2.40E-02				GAB1
Reproductive System Development and Function	cell cycle progression of oocytes	2.40E-02				GAB1
Inflammatory Disease	chronic sinusitis	2.40E-02				NR3C1
Respiratory Disease	chronic sinusitis	2.40E-02				NR3C1
Connective Tissue Disorders	discoid lupus erythematosus	2.40E-02				NR3C1
Skeletal and Muscular Disorders	discoid lupus erythematosus	2.40E-02				NR3C1
Dermatological Diseases and Conditions	discoid lupus erythematosus	2.40E-02				NR3C1
Immunological Disease	discoid lupus erythematosus	2.40E-02				NR3C1
Inflammatory Disease	discoid lupus erythematosus	2.40E-02				NR3C1
Organismal Injury and Abnormalities	edema of cells	2.40E-02				NR3C1
Immunological Disease	hypersensitivity pneumonitis	2.40E-02				NR3C1
Inflammatory Disease	hypersensitivity pneumonitis	2.40E-02				NR3C1
Inflammatory Response	hypersensitivity pneumonitis	2.40E-02				NR3C1
Respiratory Disease	hypersensitivity pneumonitis	2.40E-02				NR3C1
Organismal Injury and Abnormalities	multiple organ failure	2.40E-02				NR3C1
Neurological Disease	neurodegeneration of thalamus	2.40E-02				VIM
Organismal Injury and Abnormalities	neurodegeneration of thalamus	2.40E-02				VIM
Neurological Disease	optic neuritis	2.40E-02				NR3C1
Inflammatory Disease	optic neuritis	2.40E-02				NR3C1
Ophthalmic Disease	optic neuritis	2.40E-02				NR3C1
Cellular Compromise	oxidative stress response of kidney cell lines	2.40E-02				ALDH3A2
Cellular Function and Maintenance	permeability of skin cell lines	2.40E-02				RAP1A
Cell Morphology	permeability of skin cell lines	2.40E-02				RAP1A
Cancer	pro-B-cell lymphoma	2.40E-02				UBE2A
Hematological Disease	pro-B-cell lymphoma	2.40E-02				UBE2A
Cellular Development	proliferation of granule neuron progenitor cells	2.40E-02				SMARCA4
Cellular Growth and Proliferation	proliferation of granule neuron progenitor cells	2.40E-02				SMARCA4
Nervous System Development and Function	proliferation of granule neuron progenitor cells	2.40E-02				SMARCA4
Organ Morphology	thickness of interalveolar septa	2.40E-02				NR3C1
Respiratory Disease	thickness of interalveolar septa	2.40E-02				NR3C1
Respiratory System Development and Function	thickness of interalveolar septa	2.40E-02				NR3C1
Infectious Disease	tinea corporis	2.40E-02				NR3C1
Dermatological Diseases and Conditions	tinea corporis	2.40E-02				NR3C1
Infectious Disease	tinea pedis	2.40E-02				NR3C1
Dermatological Diseases and Conditions	tinea pedis	2.40E-02				NR3C1
Cancer	transformation of gonadal cell lines	2.40E-02				NR3C1
Small Molecule Biochemistry	transport of adenine	2.40E-02				VDAC3
Molecular Transport	transport of adenine	2.40E-02				VDAC3
Nucleic Acid Metabolism	transport of adenine	2.40E-02				VDAC3
Respiratory Disease	wheeze	2.40E-02				NR3C1
Cell Cycle	replication of cells	2.63E-02				TFDP1,YY1
Cell Morphology	abnormal morphology of axonemes	2.87E-02				VDAC3
Organ Morphology	abnormal morphology of small adrenal gland	2.87E-02				B4GALT1
Tissue Morphology	abnormal morphology of tracheal ciliated epithelium	2.87E-02				VDAC3
Hematological System Development and Function	anticoagulation	2.87E-02				GGCX
Connective Tissue Disorders	bursitis	2.87E-02				NR3C1
Skeletal and Muscular Disorders	bursitis	2.87E-02				NR3C1
Inflammatory Disease	bursitis	2.87E-02				NR3C1
Cellular Development	differentiation of intestinal cells	2.87E-02				SYMPK
Embryonic Development	differentiation of skin	2.87E-02				NR3C1
Hair and Skin Development and Function	differentiation of skin	2.87E-02				NR3C1
Organ Development	differentiation of skin	2.87E-02				NR3C1
Organismal Development	differentiation of skin	2.87E-02				NR3C1
Tissue Development	differentiation of skin	2.87E-02				NR3C1
Cellular Development	differentiation of skin	2.87E-02				NR3C1
Cellular Assembly and Organization	dissociation of microtubules	2.87E-02				RAP1A
Cellular Function and Maintenance	dissociation of microtubules	2.87E-02				RAP1A
Cellular Function and Maintenance	efflux of Na+	2.87E-02				FXYD1
Molecular Transport	efflux of Na+	2.87E-02				FXYD1
Organ Morphology	enlargement of spleen	2.87E-02				MLLT10
Cellular Assembly and Organization	erosion of telomeres	2.87E-02				HNRNPD
Dermatological Diseases and Conditions	erythroderma	2.87E-02				NR3C1
Inflammatory Disease	erythroderma	2.87E-02				NR3C1
Inflammatory Response	erythroderma	2.87E-02				NR3C1
Cellular Assembly and Organization	fission of peroxisomes	2.87E-02				MFF
Cell Cycle	fission of peroxisomes	2.87E-02				MFF
Embryonic Development	hatching of blastocyst	2.87E-02				SMARCA4
Reproductive System Development and Function	hatching of blastocyst	2.87E-02				SMARCA4
Embryonic Development	maturation of lung	2.87E-02				NR3C1
Organ Development	maturation of lung	2.87E-02				NR3C1
Organismal Development	maturation of lung	2.87E-02				NR3C1
Tissue Development	maturation of lung	2.87E-02				NR3C1
Respiratory System Development and Function	maturation of lung	2.87E-02				NR3C1
Small Molecule Biochemistry	methylation of arginine	2.87E-02				PRMT5
Post-Translational Modification	methylation of arginine	2.87E-02				PRMT5
Amino Acid Metabolism	methylation of arginine	2.87E-02				PRMT5
Small Molecule Biochemistry	movement of cholesterol	2.87E-02				VIM
Molecular Transport	movement of cholesterol	2.87E-02				VIM
Lipid Metabolism	movement of cholesterol	2.87E-02				VIM
DNA Replication, Recombination, and Repair	mutagenesis of DNA	2.87E-02				UBE2A
Neurological Disease	neuroinflammation of brain	2.87E-02				VIM
Inflammatory Disease	neuroinflammation of brain	2.87E-02				VIM
Inflammatory Response	neuroinflammation of brain	2.87E-02				VIM
Tissue Development	polarity of somites	2.87E-02				MIB1
Gastrointestinal Disease	proctosigmoiditis	2.87E-02				NR3C1
Inflammatory Disease	proctosigmoiditis	2.87E-02				NR3C1
Small Molecule Biochemistry	quantity of galactosylceramide	2.87E-02				B4GALT1
Molecular Transport	quantity of galactosylceramide	2.87E-02				B4GALT1
Lipid Metabolism	quantity of galactosylceramide	2.87E-02				B4GALT1
Cardiovascular Disease	retinal vein occlusion	2.87E-02				NR3C1
Hematological Disease	retinal vein occlusion	2.87E-02				NR3C1
Ophthalmic Disease	retinal vein occlusion	2.87E-02				NR3C1
Gene Expression	transrepression	2.87E-02				NR3C1
Cell Morphology	tubulation of skin cell lines	2.87E-02				RAP1A
Cellular Development	tubulation of skin cell lines	2.87E-02				RAP1A
Cell Signaling	Ras protein signal transduction	3.01E-02				BRAP,G3BP1
Tissue Morphology	abnormal morphology of mesenchyme	3.32E-02				ATP2C1,MIB1
Cellular Assembly and Organization	formation of chromosome components	3.32E-02				ATRX,SYCP1
DNA Replication, Recombination, and Repair	formation of chromosome components	3.32E-02				ATRX,SYCP1
Neurological Disease	West syndrome	3.34E-02				NR3C1
Small Molecule Biochemistry	absorption of triacylglycerol	3.34E-02				MGAT2
Molecular Transport	absorption of triacylglycerol	3.34E-02				MGAT2
Lipid Metabolism	absorption of triacylglycerol	3.34E-02				MGAT2
Inflammatory Disease	bronchiolitis	3.34E-02				NR3C1
Respiratory Disease	bronchiolitis	3.34E-02				NR3C1
Nervous System Development and Function	closure of eyelid	3.34E-02				NR3C1
Visual System Development and Function	closure of eyelid	3.34E-02				NR3C1
Ophthalmic Disease	diabetic macular edema	3.34E-02				NR3C1
Tissue Development	differentiation of skeletal muscle	3.34E-02				TRIM27
Cellular Development	differentiation of skeletal muscle	3.34E-02				TRIM27
Skeletal and Muscular System Development and Function	differentiation of skeletal muscle	3.34E-02				TRIM27
Cellular Compromise	endoplasmic reticulum stress response of embryonic cell lines	3.34E-02				MGAT2
Cellular Function and Maintenance	endoplasmic reticulum stress response of embryonic cell lines	3.34E-02				MGAT2
Cellular Compromise	endoplasmic reticulum stress response of kidney cell lines	3.34E-02				MGAT2
Cellular Function and Maintenance	endoplasmic reticulum stress response of kidney cell lines	3.34E-02				MGAT2
Dermatological Diseases and Conditions	hand dermatosis	3.34E-02				NR3C1
Dermatological Diseases and Conditions	idiopathic thrombocytopenic purpura	3.34E-02				NR3C1
Hematological Disease	idiopathic thrombocytopenic purpura	3.34E-02				NR3C1
Tissue Development	inflammation of spinal cord	3.34E-02				NR3C1
Inflammatory Response	inflammation of spinal cord	3.34E-02				NR3C1
Cell Morphology	morphology of thyroid tumor cell lines	3.34E-02				VIM
Cellular Assembly and Organization	penetration of zona pellucida	3.34E-02				B4GALT1
Embryonic Development	penetration of zona pellucida	3.34E-02				B4GALT1
Organismal Development	penetration of zona pellucida	3.34E-02				B4GALT1
Reproductive System Development and Function	penetration of zona pellucida	3.34E-02				B4GALT1
Endocrine System Disorders	pituitary ACTH hypersecretion	3.34E-02				NR3C1
Metabolic Disease	pituitary ACTH hypersecretion	3.34E-02				NR3C1
Reproductive System Disease	pituitary ACTH hypersecretion	3.34E-02				NR3C1
Gastrointestinal Disease	proctitis	3.34E-02				NR3C1
Inflammatory Disease	proctitis	3.34E-02				NR3C1
Cellular Growth and Proliferation	proliferation of gastric cells	3.34E-02				TXNDC5
Inflammatory Response	rejection of organ	3.34E-02				NR3C1
Small Molecule Biochemistry	synthesis of epinephrine	3.34E-02				NR3C1
Drug Metabolism	synthesis of epinephrine	3.34E-02				NR3C1
Cell Signaling	I-kappaB kinase/NF-kappaB cascade	3.38E-02				ATP2C1,AZI2,PPP5C
Cell Cycle	arrest in meiosis	3.42E-02				MGAT2,SYCP1
Cell Morphology	shape change of kidney cell lines	3.42E-02				GAB1,VIM
Renal and Urological System Development and Function	shape change of kidney cell lines	3.42E-02				GAB1,VIM
Hematological System Development and Function	function of myeloid cells	3.42E-02				B4GALT1,HNRNPD,RAP1A,UNC5B
Cellular Function and Maintenance	function of myeloid cells	3.42E-02				B4GALT1,HNRNPD,RAP1A,UNC5B
Cellular Growth and Proliferation	cytostasis of tumor cell lines	3.50E-02				G3BP1,NR3C1,SMARCA4
Reproductive System Development and Function	birthweight	3.52E-02				HNRNPD,UBE2A
Small Molecule Biochemistry	synthesis of steroid hormone	3.74E-02				NR3C1,VIM
Lipid Metabolism	synthesis of steroid hormone	3.74E-02				NR3C1,VIM
Vitamin and Mineral Metabolism	synthesis of steroid hormone	3.74E-02				NR3C1,VIM
Cellular Development	differentiation of fibroblast cell lines	3.81E-02				NR3C1,PRMT5,SMARCA4
Connective Tissue Development and Function	differentiation of fibroblast cell lines	3.81E-02				NR3C1,PRMT5,SMARCA4
Hair and Skin Development and Function	G1/S phase transition of epithelial cell lines	3.81E-02				TFDP1
Cell Cycle	G1/S phase transition of epithelial cell lines	3.81E-02				TFDP1
Cell Cycle	G2/M phase of fibroblast cell lines	3.81E-02				PPP5C
Connective Tissue Development and Function	G2/M phase of fibroblast cell lines	3.81E-02				PPP5C
Organismal Injury and Abnormalities	abdominal hemorrhage	3.81E-02				GGCX
Gastrointestinal Disease	abnormal digestion of food	3.81E-02				MGAT2
Cell Cycle	arrest in cell cycle progression of carcinoma cell lines	3.81E-02				SMARCA4
Gene Expression	binding of serum response element	3.81E-02				NR3C1
Cancer	development of papilloma	3.81E-02				NR3C1
Organ Morphology	expansion of mesangial matrix	3.81E-02				B4GALT1
Organ Development	expansion of mesangial matrix	3.81E-02				B4GALT1
Renal and Urological Disease	expansion of mesangial matrix	3.81E-02				B4GALT1
Renal and Urological System Development and Function	expansion of mesangial matrix	3.81E-02				B4GALT1
Organismal Injury and Abnormalities	granulocytosis	3.81E-02				MIB1
Hematological Disease	granulocytosis	3.81E-02				MIB1
Immunological Disease	granulocytosis	3.81E-02				MIB1
Cancer	initiation of transformation of liver cells	3.81E-02				MLLT10
Inflammatory Disease	iridocyclitis	3.81E-02				NR3C1
Ophthalmic Disease	iridocyclitis	3.81E-02				NR3C1
Molecular Transport	localization of mRNA	3.81E-02				G3BP1
Gene Expression	localization of mRNA	3.81E-02				G3BP1
RNA Trafficking	localization of mRNA	3.81E-02				G3BP1
Ophthalmic Disease	proliferative vitreoretinopathy	3.81E-02				NR3C1
Tissue Morphology	quantity of visceral fat	3.81E-02				NR3C1
Connective Tissue Development and Function	quantity of visceral fat	3.81E-02				NR3C1
Cellular Movement	scattering of epithelial cells	3.81E-02				GAB1
Organismal Functions	stress response of mice	3.81E-02				NR3C1
Cellular Assembly and Organization	morphology of nucleus	3.85E-02				NR3C1,VIM
Cell Morphology	morphology of nucleus	3.85E-02				NR3C1,VIM
DNA Replication, Recombination, and Repair	homologous recombination	3.96E-02				ATRX,SYCP1
Cell Cycle	homologous recombination	3.96E-02				ATRX,SYCP1
Cellular Assembly and Organization	remodeling of chromatin	3.96E-02				NR3C1,SMARCA4
DNA Replication, Recombination, and Repair	remodeling of chromatin	3.96E-02				NR3C1,SMARCA4
Cell Cycle	remodeling of chromatin	3.96E-02				NR3C1,SMARCA4
Cellular Development	proliferation of hepatoma cell lines	4.00E-02				GAB1,NR3C1,YY1
Cellular Growth and Proliferation	proliferation of hepatoma cell lines	4.00E-02				GAB1,NR3C1,YY1
Organismal Injury and Abnormalities	postoperative pain	4.07E-02				ATP2C1,NR3C1
Cardiovascular Disease	reperfusion injury	4.07E-02				ATP2C1,UNC5B
Dermatological Diseases and Conditions	skin lesion	4.07E-02				B4GALT1,VIM
Reproductive System Development and Function	cell movement of sperm	4.18E-02				B4GALT1,VDAC3
Cellular Movement	cell movement of sperm	4.18E-02				B4GALT1,VDAC3
Renal and Urological Disease	proteinuria	4.19E-02				MGAT2,NR3C1,PSMD1
Tissue Morphology	abnormal morphology of head mesenchyme	4.28E-02				ATP2C1
Cellular Development	adipogenesis of fibroblasts	4.28E-02				TFDP1
Connective Tissue Development and Function	adipogenesis of fibroblasts	4.28E-02				TFDP1
Cell Death and Survival	apoptosis of progenitor cells	4.28E-02				ATRX
Renal and Urological Disease	bleeding of kidney	4.28E-02				HNRNPD
Organismal Injury and Abnormalities	bleeding of kidney	4.28E-02				HNRNPD
Connective Tissue Disorders	collagen disease	4.28E-02				NR3C1
Immunological Disease	collagen disease	4.28E-02				NR3C1
Embryonic Development	development of marginal-zone B lymphocytes	4.28E-02				MIB1
Organ Development	development of marginal-zone B lymphocytes	4.28E-02				MIB1
Organismal Development	development of marginal-zone B lymphocytes	4.28E-02				MIB1
Tissue Development	development of marginal-zone B lymphocytes	4.28E-02				MIB1
Hematological System Development and Function	development of marginal-zone B lymphocytes	4.28E-02				MIB1
Cellular Development	development of marginal-zone B lymphocytes	4.28E-02				MIB1
Humoral Immune Response	development of marginal-zone B lymphocytes	4.28E-02				MIB1
Hematopoiesis	development of marginal-zone B lymphocytes	4.28E-02				MIB1
Lymphoid Tissue Structure and Development	development of marginal-zone B lymphocytes	4.28E-02				MIB1
Cellular Development	differentiation of artery	4.28E-02				MIB1
Cellular Compromise	endoplasmic reticulum stress response of epithelial cell lines	4.28E-02				MGAT2
Cellular Function and Maintenance	endoplasmic reticulum stress response of epithelial cell lines	4.28E-02				MGAT2
Cellular Assembly and Organization	formation of intermediate filaments	4.28E-02				VIM
Tissue Development	formation of intermediate filaments	4.28E-02				VIM
Cellular Function and Maintenance	formation of intermediate filaments	4.28E-02				VIM
Cellular Movement	invasion of thyroid tumor cell lines	4.28E-02				VIM
Embryonic Development	lack of second branchial arch	4.28E-02				MIB1
Tissue Morphology	lack of second branchial arch	4.28E-02				MIB1
DNA Replication, Recombination, and Repair	modification of genomic DNA	4.28E-02				ATRX
Cellular Assembly and Organization	quantity of intermediate filaments	4.28E-02				VIM
Cell Cycle	re-entry into S phase of bone cancer cell lines	4.28E-02				TFDP1
Hair and Skin Development and Function	re-epithelialization of wound	4.28E-02				B4GALT1
Organismal Injury and Abnormalities	re-epithelialization of wound	4.28E-02				B4GALT1
Cellular Development	differentiation of brain cells	4.64E-02				ATP2C1,MIB1
Dermatological Diseases and Conditions	Stevens-Johnson syndrome	4.74E-02				NR3C1
Gastrointestinal Disease	Stevens-Johnson syndrome	4.74E-02				NR3C1
Immunological Disease	Stevens-Johnson syndrome	4.74E-02				NR3C1
Organ Morphology	abnormal morphology of enlarged adrenal gland	4.74E-02				NR3C1
Dermatological Diseases and Conditions	alopecia areata	4.74E-02				NR3C1
Neurological Disease	atrophy of brain	4.74E-02				VIM
Organismal Injury and Abnormalities	atrophy of brain	4.74E-02				VIM
Embryonic Development	development of labyrinthine zone of placenta	4.74E-02				GAB1
Organ Development	development of labyrinthine zone of placenta	4.74E-02				GAB1
Organismal Development	development of labyrinthine zone of placenta	4.74E-02				GAB1
Tissue Development	development of labyrinthine zone of placenta	4.74E-02				GAB1
Reproductive System Development and Function	development of labyrinthine zone of placenta	4.74E-02				GAB1
Tissue Development	development of neuroepithelium	4.74E-02				MIB1
Cellular Assembly and Organization	formation of synaptonemal complexes	4.74E-02				SYCP1
DNA Replication, Recombination, and Repair	formation of synaptonemal complexes	4.74E-02				SYCP1
Inflammatory Disease	inflammation of iris	4.74E-02				NR3C1
Inflammatory Response	inflammation of iris	4.74E-02				NR3C1
Ophthalmic Disease	inflammation of iris	4.74E-02				NR3C1
Cellular Movement	invasion of adenocarcinoma cell lines	4.74E-02				YY1
Immunological Disease	perennial allergic rhinitis	4.74E-02				NR3C1
Inflammatory Disease	perennial allergic rhinitis	4.74E-02				NR3C1
Respiratory Disease	perennial allergic rhinitis	4.74E-02				NR3C1
Cell Cycle	re-entry into S phase of fibroblast cell lines	4.74E-02				TFDP1
Connective Tissue Development and Function	re-entry into S phase of fibroblast cell lines	4.74E-02				TFDP1
Gene Expression	replication of RNA	4.74E-02				G3BP1
Dermatological Diseases and Conditions	seborrheic dermatitis	4.74E-02				NR3C1
Inflammatory Disease	seborrheic dermatitis	4.74E-02				NR3C1
Inflammatory Response	seborrheic dermatitis	4.74E-02				NR3C1
Carbohydrate Metabolism	secretion of hyaluronic acid	4.74E-02				GAB1
Small Molecule Biochemistry	secretion of hyaluronic acid	4.74E-02				GAB1
Molecular Transport	secretion of hyaluronic acid	4.74E-02				GAB1
Drug Metabolism	secretion of hyaluronic acid	4.74E-02				GAB1
Post-Translational Modification	sialylation	4.74E-02				B4GALT1
Organismal Development	vasodilation of aortic ring tissue	4.74E-02				NR3C1
Tissue Morphology	vasodilation of aortic ring tissue	4.74E-02				NR3C1
Cardiovascular System Development and Function	vasodilation of aortic ring tissue	4.74E-02				NR3C1
Cellular Assembly and Organization	quantity of neurites	4.76E-02				ATP2C1,CANX
Cellular Function and Maintenance	quantity of neurites	4.76E-02				ATP2C1,CANX
Nervous System Development and Function	quantity of neurites	4.76E-02				ATP2C1,CANX

## Sheet: TableS4
TABLE S4. SIGNIFICANTLY ENRICHED UPSTREAM REGULATORS AT 3h FOLLOWING CARDIOEMBOLIC STROKE IN FEMALE AND IN MALE.
3h_Female_UpstreamAnalysis
Upstream Regulator	Molecule Type	Predicted Activation State	Activation z-score	Notes	p-value of overlap	Target molecules in dataset	Mechanistic Network
lipopolysaccharide	chemical drug	Activated	5.830	bias	7.11E-04	ABCA1,ALOX5,ANKRD22,ANXA1,ANXA7,AQP3,ARG1,ASAP1,ATG7,BCL2A1,BECN1,CASP1,CCNB2,CCRN4L,CD22,CD44,CD48,CD55,CD86,CEBPD,CFLAR,CLEC4D,CLEC4E,CLEC5A,CREM,CRTAP,CXCL16,DUSP1,EMB,ENO1,ERO1L,FCER1G,FTH1,GK,H1FX,HMGB1,IDH1,IL18RAP,IL1R1,IL1R2,IRAK3,ITGAM,JUND,KLF6,LCP2,LIMK2,LIPA,MAP4K4,MCTS1,MME,MMP9,MTF1,MYD88,NCOA3,NFIL3,NFKB1,NOTCH2,NR3C1,PELI1,PFKFB3,PLAUR,RAB37,RBMS1,S100A12,SEC11A,SP1,SPTLC2,STAM2,S…	CD40,CSF2,FOS,MYC,P38 MAPK,TNF,TP53,lipopolysaccharide
phorbol myristate acetate	chemical drug	Activated	5.027	bias	1.71E-02	ABCA1,ACSM5,ANXA1,ATP11B,AURKA,BCL2A1,BECN1,BIRC5,CD44,CD55,CFLAR,CREB1,CREM,CSTA,DNAJC3,DUSP1,FCER1G,FOSL2,FTH1,H1FX,IRAK3,ITCH,ITGAM,JUND,LIN7A,LIPA,METAP2,MINA,MKNK1,MME,MMP9,NFIL3,NFKB1,PLAUR,PSEN1,PTEN,RAB27A,SP1,STAT5B,TEF,TFDP1,TLR2,TLR5,TLR8,TSG101,UBXN4,VCAN,VIM
TNF	cytokine	Activated	4.514		3.31E-03	ABCA1,ALOX5,ANXA1,AQP3,AQP9,ARG1,B4GALT1,BCL2A1,BIRC5,CASP1,CCRN4L,CD44,CD55,CD86,CEBPD,CFLAR,CLEC4E,CLEC5A,CREB1,CREM,CXCL16,CXCR5,DUSP1,EMP1,FCAR,FCER1G,FOSL2,FTH1,GNB4,GPD2,HIPK3,HMGB1,IFNAR2,IL1R1,IL1R2,IRAK3,ITGAM,JAK1,JUND,KCNJ2,KIF20A,KLF6,LDHA,LRG1,MAN1A2,MAP2K6,MAPK1,MAPK14,MMP9,MYD88,NFKB1,NLRP12,NR3C1,NUP98,PAPPA,PCBP2,PDK3,PLAUR,PSEN1,PTEN,RAC1,SEC22B,SERPINB8,SLC12A6,SOAT1,SOX9,SP1,S…	CSF2,EGF,FOS,MAPK14,MYC,P38 MAPK,TGFB1,TNF,TP53
IL5	cytokine	Activated	4.147	bias	1.87E-02	ATXN1,CD55,CKAP4,ENO1,ERO1L,FOSL2,GK,IL1R2,ITGAM,LCP2,LIMK2,MKNK1,MMP9,NFIL3,PGM1,QSOX1,SKA1,VIM
EGF	growth factor	Activated	4.081	bias	2.20E-03	AQP3,AURKA,B4GALT1,BIRC5,CASP1,CD44,CEBPD,CFLAR,CREM,DAD1,DUSP1,EZH1,IDH1,IDS,IL1R1,IL1R2,ITGAM,JUND,LDHA,LIMK2,MAPK1,MMP9,PBK,PLAUR,PTTG1,SP1,TFDP1,VCAN,VIM,ZFP36L2	EGF,MYC,P38 MAPK,RAF1,TGFB1,TP53
CSF2	cytokine	Activated	4.032	bias	4.22E-04	ABCA1,ALOX5,ANXA1,ARG1,ATXN1,AURKA,BCL2A1,BIRC5,CARD11,CASC3,CASP1,CD86,CDCA2,CREB1,GK,HJURP,HMGB1,IL1R1,IRAK3,ITGAM,LAMP2,MKNK1,MME,MMP9,NFKB1,PSEN1,QSOX1,SKA1,TLR2,TLR5,UBE2C,ZAK	CSF2,FOS,MYC,P38 MAPK,RAF1,TNF,TP53
IL6	cytokine	Activated	3.904	bias	1.76E-02	ABCA1,ANXA1,ARG1,BIRC5,CASP1,CCNB1,CCNB2,CD44,CD48,CD86,CEBPD,CFLAR,CLEC4E,DUSP1,GLRX,IL1R1,ITGAM,JAK1,JUND,LRG1,MMP9,MYD88,NFKB1,PTTG1,RNASE6,SH3GLB1,STOM,TLR2,TLR5,TLR8,TNFRSF25,TRAF7,UBE2C,VIM,XRCC5
TGFB1	growth factor	Activated	3.833		5.19E-04	AASS,ABCA1,ADAM10,ADAM19,ALOX5,AQP9,ARG1,ARPC2,ATG7,ATXN1,BECN1,BIRC5,C20orf24,CALCOCO2,CARS,CASP1,CCNB1,CCNB2,CD44,CD55,CD59,CD86,CDC42SE1,CELF2,CHMP3,CPQ,CXADR,CXCR5,DAD1,DUSP1,ELF4,FCAR,FCER1G,FGF9,FNDC3B,FOSL2,FTH1,FXYD5,GNB4,GYG1,H1FX,IL1R1,ILK,IRAK3,ITGAM,JUND,LDHA,LIMK2,LPAR4,MAPK1,MAPK13,MAPK14,MARK3,MBOAT2,MMP9,MYD88,NCOA3,NIPA2,ORC1,PA2G4,PAK3,PAPPA,PLAUR,PLXNC1,PPP1R13B,PPP2R2A,PPP2R5A…	FOS,MAPK14,MAPK8,MYC,P38 MAPK,TGFB1,TNF,TP53
XBP1	transcription regulator	Activated	3.826	bias	1.71E-03	ATF6,BECN1,COPG1,DAD1,DNAJC3,GGCX,GOLGB1,RPN2,SEC11A,SEC24D,SEC61B,SPCS3,SSR4,TFDP1,TRAM1,TXN,TXNDC5
F2	peptidase	Activated	3.404	bias	4.49E-02	B4GALT1,CASP1,CD44,CD55,CFLAR,CKAP4,DUSP1,ENTPD1,FOSL2,KLF6,LAMP2,MMP9,PLAUR,RAC1,SLC2A3,TIMP2
beta-estradiol	chemical - endogenous mammalian	Activated	3.366		3.98E-02	ABCA1,ABHD5,ANXA1,ARG1,ATXN3,AURKA,BCL2A1,BIRC5,CCNB1,CCNB2,CD44,CD55,CD86,CDK11A/CDK11B,CLEC4D,COL6A6,CREM,CST8,CXADR,DGUOK,DNAJC3,DUSP1,EMP1,ENO1,FEZ2,FGF9,FOLH1,FXYD5,GK,GPD2,HNRNPD,IL1R1,IL1R2,JAK1,JUND,KLF6,KPNA2,KPNA4,LDHA,LHFPL2,MAP2K6,MAPK14,MME,MMP9,MPPED2,NCOA3,NDRG2,NR2F1,NR3C1,ORC1,PA2G4,PPP6R2,PRMT5,PSEN1,PTEN,PTTG1,QSOX1,RAB31,RAC1,RAP1A,RPN2,SLA,SLC2A3,SOX9,SP1,THSD4,TLR2,TRIM25,TX…
IFNG	cytokine	Activated	3.331		2.86E-01	ABCA1,AQP9,ARG1,ARPP19,BCL2A1,BECN1,CALCOCO2,CASP1,CD44,CD55,CD86,CFLAR,CLEC4E,CLEC5A,CREM,CXCL16,DUSP1,FCER1G,FTH1,GNB4,HMGB1,IL18RAP,IL1R1,ITGAM,JUND,KCTD12,KLF6,LCP2,LDHA,LPAR4,MAPK14,METAP2,MMP9,MYD88,NFKB1,NUP98,PAPPA,PELI1,PLAUR,PLCG1,RAB27A,SEC11A,SOAT1,TFDP1,TLR2,TLR5,TLR8,UNC5B
HIF1A	transcription regulator	Activated	3.247	bias	3.73E-02	AQP9,AURKA,BIRC5,CARS,CD164,ENO1,ERGIC1,ERO1L,LDHA,MMP9,PFKFB3,PFKFB4,PLAUR,SLC25A37,SLC2A3,SOX9,TBX5,TLR2,VIM
EIF4E	translation regulator	Activated	3.162	bias	1.13E-02	BIRC5,DEDD,DGUOK,LSM10,NOP10,PA2G4,PLAUR,RHOG,SVIL,TXNL4B,UBE2A,UBE2C
dexamethasone	chemical drug	Activated	3.156		4.43E-02	ADAM10,ANXA1,BIRC5,BMX,C3orf37,CARS,CD44,CD55,CD59,CD86,CEBPD,CELF2,CFLAR,CKLF,CPD,CPEB4,CRISPLD2,CXADR,DEDD,DLG1,DNAJC15,DUSP1,ETF1,ETFA,FGD4,FGGY,FOSL2,FTH1,HMGB1,IDS,IFI27L2,IFNAR2,IL1R1,IL1R2,IRAK3,ITGAM,ITPR3,JUND,KIF4A,KPNA2,LDHA,MAPK1,MME,MMP9,MORF4L2,NFIL3,NR3C1,NREP,PAFAH1B1,PMF1,PRRG4,SHKBP1,SLA,SLC25A37,SLC2A3,SOAT1,SOX9,STOM,TIMP2,TLR2,TLR5,TLR8,TPH1,TXN,UBE2B,UBE2C,UGCG,VCAN,WDR1,XRC…
ERBB2	kinase	Activated	3.130		2.50E-04	ABHD5,ADAM19,ADIPOR2,AIM1,APLP2,AURKA,BIRC5,CCNB1,CCNB2,CD59,CDC42SE1,CST8,EMP1,EMP3,FEZ2,FGF9,GPD2,GYG1,IDH1,ILK,LAMP2,MAPK13,MFNG,MME,MMP9,NFKB1,PFKFB3,PGM1,PLAUR,PPP2R5A,PSEN1,PTEN,RAB31,RAB34,RASA3,SKP1,SMAD2,SQRDL,STK17B,UBE2C,VCAN,VIM,ZFP36L2	EGF,ERBB2,FOS,MYC,P38 MAPK,TP53
ERK1/2	group	Activated	3.066	bias	1.14E-02	ABCA1,ALOX5,BCL2A1,CD44,CD86,CFLAR,DUSP1,ENO1,MAPK1,MKNK1,MMP9,PFKFB4,PLAUR,RAC1,SLC12A6,TIMP2,VCAN
IL1B	cytokine	Activated	2.994		1.41E-01	ANXA1,ARG1,BCL2A1,CCRN4L,CD44,CD55,CD86,CEBPD,CFLAR,CREM,DUSP1,HMGB1,IL18RAP,IL1R1,IL1R2,IRAK3,ITGAM,LDHA,MAP2K6,MAPK14,MMP9,MYLK3,NFIL3,NFKB1,PAPPA,PLXDC2,PSEN1,RRS1,SOX9,TIMP2,TLR2,TLR8,UGCG,VCAN,VIM
P38 MAPK	group	Activated	2.952	bias	5.85E-03	ABCA1,ATG7,BCL2A1,BIRC5,CD44,CD55,CD86,CFLAR,DUSP1,ITGAM,MAP4K4,MMP9,NFKB1,PLAUR,PTEN,RAB7A,S100A12,SMAD2,TIMP2,TLR2,TRADD	CSF2,FOS,MYC,P38 MAPK,TGFB1,TNF,TP53
TGM2	enzyme	Activated	2.892		1.88E-01	AQP9,BCL2A1,CD86,CD93,CFLAR,CXCR5,FCER1G,ITGAM,MMP9,TIMM8A,TOR1B,TSPAN14
MAPK8	kinase	Activated	2.891	bias	1.60E-03	ABCA1,ATG7,B4GALT1,CSTA,CXCL16,DUSP1,FOSL2,GK,HIPK3,JUND,MMP9,PLAUR,PTEN,TLR2	FOS,MAPK8,MYC,P38 MAPK,TNF,TP53
Retnlb	other	Activated	2.828	bias	5.83E-03	CD86,IL13RA1,JAK1,PTEN,STK17B,STOM,TLR2,UBE2C
TNFSF11	cytokine	Activated	2.825	bias	2.13E-02	AQP9,AURKA,BCL2A1,CD44,CLEC4E,DUSP1,GLRX,IL13RA1,ITGAM,MMP9,NFIL3,NFKB1,PA2G4,PLAUR,TLR2,YWHAZ
phorbol esters	chemical - other	Activated	2.804	bias	1.37E-02	ANXA1,CD44,DUSP1,IL1R1,ITGAM,MMP9,NFKB1,TXN
IL1	group	Activated	2.768	bias	4.01E-02	CASP1,CD55,CD59,CEBPD,DUSP1,FTH1,HMGB1,IL1R1,IL1R2,ITGAM,MAP2K6,MAPK1,MMP9,SLC2A3,TLR2,UGCG,VCAN
CSF3	cytokine	Activated	2.699		5.80E-02	ARG1,BIRC5,CD44,ENTPD1,ITGAM,MMP9,NFIL3,TFDP1,TLR2,TLR5,TLR8
IL2	cytokine	Activated	2.666	bias	8.00E-03	ACVR1B,CACNA1E,CASP1,CD44,CD59,CD86,CFLAR,CPD,CREB1,CXCR5,EMP1,FCER1G,IL18RAP,IL1R1,IL1R2,JAK1,JUND,KLF6,LCP2,MAP2K6,MME,MMP9,NFKB1,PPP6C,SLC2A3,STAT5B,STK17B,TLR2,VIM,ZAK	CSF2,FOS,IL2,MYC,P38 MAPK,RAF1,TNF,TP53
Jnk	group	Activated	2.587	bias	3.06E-02	ABCA1,ATG7,CD44,CD55,CD86,DUSP1,JUND,MMP9,PLAUR,PTEN,S100A12,VCAN
TGFA	growth factor	Activated	2.581	bias	1.17E-02	BIRC5,CASP1,FOSL2,ITGAM,MMP9,PTTG1,TLR5,VIM
LEP	growth factor	Activated	2.575		1.00E00	AQP3,AQP9,BCL2A1,BIRC5,IDH1,IL1R1,IL1R2,ITGAM,JUND,LIPA,MLX,NR3C1,RAC1,VIM
NR3C1	ligand-dependent nuclear receptor	Activated	2.561		3.66E-02	ABCA1,ANXA1,ATXN1,BCOR,CDK11A/CDK11B,DAD1,DNAJC15,DUSP1,EMP1,FCER1G,FGD4,GRIA3,IDH1,JMJD6,JUND,MAPK1,MYD88,NFKB1,NR3C1,NSMAF,PSEN1,RAB11A,SH3GLB1,STK17B,STOM,TLR2,TLR5,TNFRSF25,TUBA4A,TXN,UGCG,WDR26,YWHAZ,ZAK
hydrogen peroxide	chemical - endogenous mammalian	Activated	2.559	bias	1.16E-02	ALOX5,ATF6,ATG7,AURKA,BCL2A1,CCNB1,CD55,CD59,CD86,DNAJA2,DUSP1,FTH1,GLRX,HMGB1,ISCU,MAPK14,PCBP2,PLAUR,PTEN,RAB27A,RAC1,SP1,TUBA4A,TXN,VIM,WDR26
AGN194204	chemical drug	Activated	2.557	bias	1.42E-03	ADAM19,AIM1,AURKA,BCL2A1,DUSP1,EMP1,EMP3,H2AFZ,IL1R2,KIF20A,KIF4A,KLF6,MMP9,NSMAF,STAT5B
IL8	cytokine	Activated	2.554	bias	3.91E-03	ANXA1,CD44,CFLAR,CR1,ITGAM,MMP9,NR3C1,RAC1	FOS,IL8,MYC,P38 MAPK,TP53,lipopolysaccharide
KRAS	enzyme	Activated	2.545		3.61E-04	ATG7,BIRC5,CASP1,CD44,CXADR,ERO1L,FTH1,LAMP2,MAPK14,NR3C1,PPFIBP1,PTEN,RAB7A,RBM7,SOAT1,SORT1,STOM,TCP1,TIMP2,UBE2I,UQCRC2,VAPA,VCAN,VIM,VPS35	KRAS,MYC,P38 MAPK,TP53
ionomycin	chemical reagent	Activated	2.506	bias	3.48E-02	BCL2A1,BECN1,DNAJC3,DUSP1,ITCH,ITPR3,KCNJ2,LDHA,MMP9,SMAD2,STAT5B,TLR2
SYVN1	transporter	Activated	2.496	bias	4.70E-03	APLP2,CD44,CDK11A/CDK11B,CRTAP,DUSP1,GGCX,PTBP1,RAB34,RPN2,SLC2A3,STOM,ZC3HAV1,ZNF281
bleomycin	chemical drug	Activated	2.474	bias	2.41E-02	CD86,IL13RA1,JAK1,MMP9,PTEN,PTTG1,STK17B,STOM,TIMP2,TLR2,UBE2C
hexachlorobenzene	chemical toxicant	Activated	2.449	bias	1.61E-02	ANXA1,CD44,EMP3,FXYD5,MMP9,VIM
mir-223	microRNA	Activated	2.449		1.63E-01	CD93,CLEC4E,EMP1,MCTP2,NDRG2,SOAT1
MAP2K1	kinase	Activated	2.433	bias	1.92E-02	BCL2A1,CD44,CFLAR,CSTA,DUSP1,ENO1,JUND,MMP9,PLAUR,SMAD2,SP1,UNC5B
daidzein	chemical drug	Activated	2.400		4.68E-02	ARG1,BMP2K,CD86,CKLF,FXYD5,GRK6,LCP2
FSH	complex	Activated	2.383		8.35E-03	ACTR2,AQP3,BECN1,CD55,CFLAR,CREM,DUSP1,FOSL2,GK,ILK,JMJD6,MAP4K4,MAPK14,MMP9,PLIN3,PSMD1,PTEN,RAB27A,RAB31,RGS12,SMAD2,SMARCA4,SMARCD1,STK24,TIMP2,TMBIM6
MAPK14	kinase	Activated	2.311	bias	7.36E-04	ABCA1,ATP5J2,CCNB1,CD86,CEBPD,DUSP1,FOSL2,JUND,MAP2K6,MAPK14,MMP9,PLAUR,PSEN1,PTEN,TIMP2	FOS,MAPK14,MAPK8,MYC,P38 MAPK,TNF,TP53
nonylphenol	chemical toxicant	Activated	2.236	bias	1.42E-02	LCP2,LDHA,PFKFB4,RPN2,STK17B
resiquimod	chemical drug	Activated	2.234	bias	4.02E-02	BCL2A1,CD44,CLEC4E,IRAK3,MYD88,NFKB1,RAB7A,RAP1A,TLR2,TLR8,YWHAB
ERK	group	Activated	2.225	bias	1.57E-03	ABCA1,ADAM10,ARPC2,BECN1,CEBPD,CFLAR,DUSP1,FOSL2,GK,IFNAR1,IFNAR2,ITGAM,MAP4K4,MMP9,RRS1,S100A12,UGCG,VCAN	ERK,FOS,MYC,TNF
STAT5a/b	group	Activated	2.219	bias	1.17E-02	BCL2A1,EMP1,FCER1G,LCP2,MYD88,SLC2A3,STK17B,TLR2
MAPK9	kinase	Activated	2.219		4.71E-01	FOSL2,JUND,METAP2,MMP9,PTEN,RAC1
TRAF2	enzyme	Activated	2.213		1.74E-01	AURKA,CCNB1,LRRC16A,MMP9,NFKB1
IL4	cytokine	Activated	2.212	bias	3.96E-02	ADAM19,ALOX5,ARG1,BIRC5,CCRN4L,CD44,CD55,CD86,CELF2,CXCL16,CXCR5,FCER1G,IFNAR1,IFNAR2,IL13RA1,IL18RAP,IL1R1,IL1R2,JAK1,JUND,LAMP2,MAPK1,MMP9,NCOA3,NFIL3,NFKB1,NR3C1,PPP6C,SKA1,STK4,SYMPK,TIMP2,TLR2,VIM,XRCC5,ZNF230
PLAU	peptidase	Activated	2.207		8.59E-02	ARG1,IFNAR2,MMP9,PLAUR,VIM
OSM	cytokine	Activated	2.207		1.64E-01	ABCA1,ANXA1,AQP9,ARG1,CEBPD,CXADR,DNAJC3,EMP3,HIPK3,IL13RA1,IL1R2,MAPK14,MMP9,MYD88,PFKFB3,PTEN,QSOX1,RAB31,S100A12,SEPT9,SERPINB8,SRPK1,STK4,TLR2,TMBIM6,ZC3HAV1
KLF5	transcription regulator	Activated	2.201	bias	3.28E-02	ARG1,BIRC5,DUSP1,ILK,MMP9
CpG ODN 1668	chemical reagent	Activated	2.200	bias	4.25E-02	CD86,CFLAR,IRAK3,NFKB1,TLR5
TLR2	transmembrane receptor	Activated	2.190	bias	3.45E-02	ARG1,CD86,CEBPD,DUSP1,IRAK3,MMP9,MYD88,NFKB1,NLRP12
INSR	kinase	Activated	2.178	bias	3.64E-02	ATP5B,ATP5J2,ATP5L,BCL2A1,BIRC5,COX5B,DCTN4,DUSP1,ECHS1,ETFA,EZH1,IDH1,IFNAR2,MKNK1,MMP9,NDUFA9,RAB7A,RNF13,UQCRC2,ZNRD1
platelet activating factor	chemical - endogenous mammalian	Activated	2.177	bias	3.28E-02	ITGAM,MMP9,PAFAH1B2,PLAUR,TIMP2
PLAUR	transmembrane receptor	Activated	2.166	bias	1.10E-02	ITGAM,MMP9,PLAUR,RAC1,VIM
E. coli serotype 0127B8 lipopolysaccharide	chemical - endogenous non-mammalian	Activated	2.121		4.78E-01	AQP9,CXCL16,DNAJC3,GNB4,LPAR4,MYD88,NFKB1,TLR2
BCR (complex)	complex	Activated	2.104	bias	4.85E-02	B4GALT1,BCL2A1,CD44,CD86,CFLAR,CXCR5,JAK1,MS4A6A
NFKBIA	transcription regulator	Activated	2.064		2.34E-02	ATP5J2,BCL2A1,CCNB1,CCRN4L,CD86,CEBPD,CFLAR,ERO1L,HMGB1,MMP9,NDRG2,NFKB1,NLRP12,PTEN,RAC1,RASA3,SOAT1,SORL1,SOX9,TFDP1,TIMP2,TLR2,TRADD,XRCC5,YWHAZ
prostaglandin E2	chemical - endogenous mammalian	Activated	2.059		1.14E-01	BIRC5,CASP1,CCNB1,CD44,CD55,CD86,CREM,DUSP1,FOSL2,IL1R1,IL1R2,MMP9,NFIL3,SP1,XRCC5
HRAS	enzyme	Activated	2.040		4.04E-02	ASAP1,ATP5B,ATXN1,AURKA,BIRC5,CCNB1,CD44,CSTA,DUSP1,FOSL2,GIMAP1,HMGB1,IL13RA1,ITGAM,LPP,MAPK1,MMP9,PLAUR,PRELID1,PSEN1,PTEN,RASA3,RGS12,SOAT1,SP1,STAU1,TPH1,VCAN,VIM,ZRANB1
streptozocin	chemical drug	Activated	2.007		4.06E-01	ADIPOR2,AQP9,CREB1,GK,MMP9,PTEN,SLC2A3,VIM
SELPLG	other	Activated	2.000	bias	3.79E-02	BCL2A1,IL1R2,ITGAM,PLAUR
acetaminophen	chemical drug	Activated	2.000		1.00E00	NDRG2,PLAUR,TXN,YWHAZ
PPARGC1B	transcription regulator		1.982	bias	2.00E-02	ABCA1,ATP5B,ATP5J2,ENO1,ERO1L
STAT5A	transcription regulator		1.982		3.79E-01	BCL2A1,CFLAR,FCER1G,SP1,STAT5B,TNFRSF25
STAT5B	transcription regulator		1.982		1.00E00	ASAP1,CFLAR,MPC2,STAT5B,TLR2,TNFRSF25
captopril	chemical drug		1.980		3.23E-01	ANXA1,BIRC5,CD44,MMP9
deferoxamine	chemical drug		1.976	bias	2.29E-02	CCNB1,CD59,DUSP1,ENO1,LDHA,MAPK14,NFIL3,PFKFB3,PLAUR,SLC2A3,SMAD2
TGFB2	growth factor		1.970	bias	5.79E-03	ABCA1,CD59,CFLAR,MMP9,SMAD2,SP1,VCAN	APP,FOS,MYC,TGFB1,TGFB2,TP53
SPP1	cytokine		1.961		3.53E-01	AURKA,CD44,MMP9,NDRG2
NRG1	growth factor		1.949	bias	3.14E-02	DAD1,DUSP1,EZH1,ITGAM,JUND,LIMK2,MMP9,NUP214,PAFAH1B1,PLAUR,SLC2A3,TNFRSF25,ZFP36L2
arsenic trioxide	chemical drug		1.949		2.62E-01	ATF6,BCL2A1,FTH1,GLRX,ITGAM,MMP9,PTEN
N-Ac-Leu-Leu-norleucinal	chemical - protease inhibitor		1.947		3.90E-02	ABCA1,ATF6,CCNB1,CREB1,ITPR3,LAMP2,PTTG1
AKT1	kinase		1.942		1.59E-01	BCL2A1,BIRC5,CFLAR,FXYD5,HIPK3,HNRNPL,LIPA,RAB11A,UBE2C,VCAN,VIM
tributyrin	chemical drug		1.912	bias	1.65E-02	BCL2A1,CD55,DAPP1,DUSP1,HNRNPD,MME,UGCG
mycophenolic acid	chemical drug		1.912	bias	4.68E-02	CD55,CD59,DAPP1,DUSP1,HNRNPD,MME,UGCG
Tgf beta	group		1.901		2.03E-01	ABCA1,BECN1,CASP1,CFLAR,ILK,JAK1,MMP9,SMAD2,TIMP2,TLR2,VIM
IL13	cytokine		1.883		1.36E-02	ABCA1,ARG1,BCL2A1,CASP1,CD44,CD48,CD86,CLEC4E,FKBP1A,IL13RA1,IL1R1,IL1R2,IRAK3,JAK1,LILRB3,LIPA,MMP9,PLXNC1,QSOX1,SLA,SORT1,TIMP2,TMC6
Akt	group		1.872		1.00E00	AQP3,BCL2A1,BIRC5,CFLAR,MMP9,NFKB1,TRADD,VCAN
ADCYAP1	other		1.872		1.00E00	CD86,CEBPD,CREB1,EMB,H2AFZ,ITGAM,MME,PPP1R3B
STAT6	transcription regulator		1.825		1.00E00	ADAM19,ARG1,FCER1G,IFNAR2,MMP9,NCOA3,NFIL3
PPARA	ligand-dependent nuclear receptor		1.804		3.27E-02	ABCA1,AQP3,AQP9,ARG1,ATP5B,AURKA,CEBPD,ENTPD1,GK,GPD2,H2AFZ,KIF20A,KIF4A,LECT2,ME2,MGST3,MMP9,NFKB1,QPCT,SAR1A,TLR5,TPP1,TXN
forskolin	chemical toxicant		1.792	bias	1.01E-02	ABCA1,ACTR2,AQP3,B4GALT1,CD44,CD55,CD86,CDC42SE1,CREB1,CREM,CRISPLD2,DUSP1,GK,ILK,ITPR3,JMJD6,JUND,MAP4K4,MAPK1,MMP9,NFIL3,PLIN3,PRKAR2A,PTEN,RAB27A,RAB31,RAB7A,SMARCD1,SP1,STK24,TFE3,TMBIM6,TUBA4A,VCAN
morphine	chemical drug		1.779		2.77E-02	BECN1,CREB1,MAP3K1,MAPK1,MMP9,NR3C1,PTEN,TLR2,TXN
doxorubicin	chemical drug		1.769	bias	1.59E-03	ANXA1,ATG7,AURKA,BECN1,BIRC5,CASP1,CCNB1,CCNB2,CD44,CREM,DUSP1,EMP3,FTH1,HMGB1,ITCH,KIF20A,NFKB1,PTEN,PTTG1,SMAD2,SOX9,TXN,UBE2B,UGCG,VIM	MYC,P38 MAPK,TP53,doxorubicin
tunicamycin	chemical - endogenous non-mammalian		1.719		5.05E-03	ADAM10,ADIPOR2,ATF6,COX5B,DNAJC3,ERO1L,ILK,MMP9,RRS1,TLR2,UBXN4,VIM
CXCL12	cytokine		1.701	bias	4.32E-03	ATRX,CANX,CD44,DAD1,HIPK3,HNRNPD,IFNAR2,LCP2,MMP9,NUMA1,RAP1A,VIM,XRCC5,YY1
FOS	transcription regulator		1.661		3.80E-05	APLP2,AQP3,ASAP1,ATP2C1,B4GALT1,CD164,CD44,CELF2,CFLAR,CSTA,CXCL16,DEDD,DLG1,EMB,ENO1,FEZ2,FTH1,GBA,GIT2,HIPK3,HTATIP2,KIF1B,KLF6,LAMP2,LDHA,MMP9,NFIL3,PLAUR,PPP2R2A,PTTG1,RAB11FIP1,TBL1X,TPP1,TXN,UGCG,VIM,YWHAZ,ZAK	FOS,MYC,TP53
APP	other		1.652		7.58E-04	ABCA1,APLP2,APPBP2,ARG1,ATP5B,CANX,CD44,CD59,CFLAR,ENO1,FKBP1A,HMGB1,ILK,ITGAM,ITPR3,JUND,LDHA,MAPK1,MME,MMP9,NCOA3,NDUFB11,NDUFS6,NENF,NFKB1,PAFAH1B2,PAK3,PGAM1,PLCG1,PRKAR2A,PSEN1,SMARCA4,SOX9,SUCLG1,THSD4,TLR2,TLR5,TLR8,TPP1,TUBA4A,TXN,UQCRQ,VCAN,YWHAB,YWHAZ,ZFHX3	APP,FOS,MYC,P38 MAPK,RAF1,TNF,TP53
methamphetamine	chemical drug		1.477		1.16E-02	CREM,FOSL2,MMP9,TIMP2,TPH1,TXN,UQCRC2
hyaluronic acid	chemical - endogenous mammalian		1.462	bias	6.05E-03	BIRC5,CD44,CD86,IRAK3,MMP9,MYD88,PTEN,SOX9,TIMP2	CSF2,FOS,MAPK14,MYC,P38 MAPK,TNF,TP53,hyaluronic acid
cisplatin	chemical drug		1.447		8.57E-03	ANXA1,AQP3,ASTN2,ATXN1,BCL2A1,BECN1,BIRC5,CASP1,CCNB1,CD44,CFLAR,DUSP1,EMP3,FNDC3B,FXYD5,HJURP,HMGB1,ITCH,JUND,LATS2,LIPA,NREP,PIK3C3,PSEN1,PTEN,PYCR2,RAB11FIP1,RAB22A,RAC1,RHOBTB2,SLC2A3,STK17B,TNK2,UBE2A,USP3,VIM	CSF2,FOS,MAPK14,MYC,P38 MAPK,TNF,TP53,cisplatin
crocidolite asbestos	chemical toxicant		1.414	bias	2.07E-02	CD44,FOSL2,ILK,JUND
4-tert-octylphenol	chemical toxicant		1.387	bias	4.44E-03	ATXN3,CD55,EMP1,LDHA,RPN2
CD2	transmembrane receptor		1.342	bias	2.22E-02	CCNB1,CD44,CD48,CD86,PTEN
indomethacin	chemical drug		1.321		1.24E-02	ALOX5,ANXA1,CCNB1,CD44,CD55,EMP3,FXYD5,GBA,IL1R1,ITGAM,PLAUR,PSMB5,RPS28,VCAN,VIM,XRCC5
ANXA7	ion channel		1.265		4.17E-04	DAD1,FGF9,ITGAM,ITPR3,NR3C1,PTEN,SLA,TFDP1,TSG101,UBE2B
MTOR	kinase		1.230	bias	3.61E-04	BIRC5,CASP1,CD86,CEBPD,CFLAR,ENO1,FAF1,FKBP1A,IL1R1,PDK3,PRKAR2A,PTBP1,PTEN,RHEB,TNFRSF25,TRADD	FOS,MTOR,MYC,TNF
thapsigargin	chemical toxicant		1.164	bias	1.82E-02	ADIPOR2,ATF6,CD86,COX5B,CREM,IL1R1,KPNA1,MMP9,NFIL3,TLR2,UBXN4,VIM
Ifn	group		1.134	bias	2.57E-02	CD44,CD86,IFNAR1,IL1R1,MMP9,RNASEL,TLR2,TLR5
RAF1	kinase		1.105	bias	5.16E-03	ANXA1,BECN1,CD44,CSTA,CXCR5,EMP1,EMP3,IL1R1,ITGAM,LDHA,MMP9,NFKB1,PLAUR,RAC1,TCOF1,TUBA4A,ZFP36L2	MYC,P38 MAPK,RAF1,TP53
diethylstilbestrol	chemical drug		1.073	bias	3.22E-03	AKAP8L,AQP3,AQP9,ATXN3,CD55,EMP1,GLRX,IL1R2,KIF4A,LDHA,MAPK1,NR3C1,PTTG1,RPN2,SDF2,SH3GL3,SP1
HNF4A	transcription regulator		1.067	bias	8.73E-04	AASS,ABHD6,ACOX2,AKIRIN2,AQP3,AQP9,ASB7,ATP6V1D,BMP2K,BRAP,C11orf58,CD55,CEBPD,CLPB,COX7A2L,CTDNEP1,CXADR,DAD1,DCTN4,DNAJA2,ERLIN1,ERO1L,FLJ11292,FOSL2,GDAP2,GGCX,GHITM,HAL,HMGB1,HSDL2,IFNAR1,JTB,KIF1B,KIF20A,LAMTOR5,LIPA,METAP2,MGST3,MINA,MRPL4,MTF1,MTRF1L,NAA50,NCOA3,NDUFB3,NR2F1,NRD1,NUP62CL,NUTF2,ORC1,PAPOLA,PFKFB4,PGM1,PIK3C3,PPFIBP1,PPP1R3B,PPP6C,PRCP,PRICKLE4,PRPF31,PSMB5,PSMD1,RAB11A,RAB7…
GLI1	transcription regulator		1.062	bias	2.44E-02	CNIH4,EMB,FUCA2,GALNT2,GRIA3,IDS,IL1R2,MMP9,NDRG2,NREP,RNASEL,SH3GLB1,SOX9
TIMP1	other		1.000		9.38E-03	MME,MMP9,PLAUR,TIMP2	MAPK14,TIMP1,TP53
BAX	transporter		1.000	bias	4.25E-02	CCNB1,ERO1L,IFNAR2,JAK1,MMP9
IL18	cytokine		0.971	bias	4.03E-02	CD44,CD86,CFLAR,CXCL16,ITGAM,MMP9,PTEN,SMAD2,TNFRSF25
CD40	transmembrane receptor		0.868		5.53E-03	BCL2A1,BECN1,BIRC5,CD22,CD44,CD86,CFLAR,DAPP1,DUSP1,IL13RA1,ITGAM,MMP9,NFKB1,TLR2,TNFRSF25	APP,CD40,FOS,MAPK8,MYC,P38 MAPK,TNF,TP53
Lh	complex		0.841		5.72E-04	ACTR2,BECN1,CD55,CFLAR,CREB1,DUSP1,GK,ILK,JMJD6,MAP4K4,MAPK14,MMP9,PLIN3,PRKAR2A,PSMD1,RAB27A,RAB31,RGS12,SMARCA4,SMARCD1,STK24,TMBIM6
glucagon	biologic drug		0.816	bias	1.77E-02	GOLGB1,MME,NDRG2,PLXDC2,SEC61B,SORT1
desmopressin	biologic drug		0.816	bias	1.97E-02	ENO1,GOLGB1,MME,NDRG2,PLXDC2,SEC61B,SORT1,YWHAZ
26s Proteasome	complex		0.816		3.46E-02	NFKB1,PSMB5,PTEN,SMAD2,UBE2I,VIM
5-N-ethylcarboxamido adenosine	chemical reagent		0.707		4.13E-02	ARG1,CEBPD,CREM,DAD1,KLF6,NFIL3,RAC1,VCAN
FAS	transmembrane receptor		0.666		8.50E-06	AIM1,APPBP2,BIRC5,CD22,CD44,CD48,CD59,CD86,CD93,CEBPD,CFLAR,CREB1,F5,FCAR,GIT2,GRIA3,IL13RA1,JMJD6,JUND,MAP4K4,MME,MMP9,NR3C1,NUMA1,RHEB,S100A12,SORL1,STK17B,TLR2,TLR8,TNK2,TUBA4A,UGCG	FAS,MYC,P38 MAPK,TP53
trichostatin A	chemical drug		0.600	bias	8.50E-03	ABCA1,ABHD5,APPBP2,ARG1,ARL6IP1,CCNB2,CD44,CD79B,CD86,CFLAR,CPD,CREM,CXADR,DUSP1,FOLH1,FOSL2,HNRNPD,ITGAM,KIF20A,MGST3,MMP9,MTF1,NOTCH2,PAFAH1B1,PTEN,RLIM,SMARCA4,SP1,SPIB,THSD4,TIMP2,TRADD,VIM	MYC,P38 MAPK,TP53,etoposide,trichostatin A
etoposide	chemical drug		0.588	bias	9.47E-03	ADAM10,BCL2A1,CCNB1,CD86,CFLAR,DUSP1,FTH1,MME,RHOBTB2,SEPT9,SLC2A3,TRADD	MYC,P38 MAPK,TP53,etoposide
butyric acid	chemical - endogenous mammalian		0.539		5.52E-03	ANXA1,BCL2A1,BIRC5,CCNB1,CCNB2,CD79B,CD86,DUSP1,EMP3,FTH1,H2AFZ,HMGB1,IFNAR2,IL1R1,ITGAM,ITPR3,MAPK13,NFKB1,PLCG1,PRKAR2A,PTEN,RNF141,SEC61B,SOX9,STAT5B,TUBA4A,UQCRQ	FOS,MYC,P38 MAPK,RAF1,TNF,TP53,butyric acid
GnRH analog	biologic drug		0.533		9.29E-03	ATP11B,BCL2A1,DUSP1,FKBP1A,HEBP2,ITPR3,MAPK1,MTX1,NCOA3,NUTF2,PPP2R2A,PRCP,PSMD1,RBMS1,SDF2,SEC22B,SIRPD,SLC2A3,SMAD2,SNX3,SRRM2,TFDP1,TMBIM6,TNK2
THPO	cytokine		0.526	bias	1.60E-02	AURKA,BIRC5,CCNB1,CD44,SP1
IGF1R	transmembrane receptor		0.500	bias	5.71E-04	ATP5B,ATP5J2,ATP5L,CD48,CD84,CD93,COX5B,FTH1,ITGAM,KIF20A,MAPK14,NDUFA9,RAC1,RPS26,TFDP1,TXN,UQCRC2,ZFP36L2
XDH	enzyme		0.447		1.10E-02	ABCA1,DUSP1,PLAUR,TIMP2,VIM
CALCA	other		0.426		8.36E-03	CD86,CREM,GOLGB1,MME,NDRG2,PLXDC2,RAB7A,SEC61B,SORT1
genistein	chemical drug		0.420		6.42E-03	ARG1,BIRC5,BMP2K,CCNB1,CCNB2,CD86,CFLAR,CKLF,DUSP1,FXYD5,GRK6,JUND,KCNJ2,LCP2,MMP9,PFKFB4,PTEN,RPN2,STK17B	FOS,MAPK14,MAPK8,MYC,P38 MAPK,TNF,TP53,genistein
ciprofloxacin	chemical drug		0.333		3.45E-02	ATP6V1D,CD86,CD93,CPD,DNAJC3,GBA,MAPK1,RAB11FIP1,VIM
GPX1	enzyme		0.277	bias	6.72E-03	FAF1,GLRX,MMP9,TRADD,TXN,UQCRC2
DUSP1	phosphatase		0.277	bias	2.46E-02	CD86,DUSP1,PLAUR,PTEN,TLR2
CAMP	other		0.243	bias	4.00E-02	BECN1,CD86,IL1R2,ITGAM,MYD88,NFKB1
MYC	transcription regulator		0.154		7.19E-05	ARG1,ARL6IP1,BCL2A1,BIRC5,CANX,CASP1,CCNB1,CCNB2,CD44,CD48,CD86,CDK11A/CDK11B,CEBPD,CFLAR,CLPB,COX5B,COX7A2L,CPD,CSDE1,DUSP1,EMP1,ENO1,EZH1,FTH1,H2AFZ,HNRNPD,ITGAM,KLF6,LAMP2,LDHA,ME2,METAP2,MGST3,MINA,MMP9,NDRG2,PFKFB3,PGAM1,PLAUR,PTEN,RRS1,SEC61A2,SLC2A3,SOX9,SQRDL,TFDP1,TIMM23,TIMP2,TRIP12,TXN,UBE2C,VDAC2,VIM,YY1	MAPK14,MYC,TP53
atorvastatin	chemical drug		0.078		3.63E-02	ABCA1,CD55,CD59,HMGB1,MAPK1,MMP9,S100A12,SMAD2,TLR2
TP53	transcription regulator		0.014		7.19E-05	ALOX5,ANXA1,ARL6IP1,ASTN2,ATXN1,AURKA,BCL2A1,BIRC5,BMX,CARS,CASP1,CCNB1,CCNB2,CD44,CFLAR,COX5B,DLG1,DNAJA2,DUSP1,ELF4,ETFA,F5,FKBP1A,GLRX,H2AFZ,HJURP,HMGB1,IDH1,ILK,KPNA2,LATS2,LDHA,LPP,MAP2K6,MAPK1,ME2,MMP9,NDRG2,NFKB1,NR2F1,PAFAH1B2,PAK3,PBK,PFKFB3,PIK3C3,PLAUR,PPFIBP1,PPP1R13B,PRELID1,PRKAR2A,PSEN1,PSMD1,PSMD2,PTEN,PTTG1,RFWD2,RGS12,RPN2,SEC61B,SEC62,SPTLC2,SQRDL,STAU1,SUCLG1,TBL1X,TFDP1,TIMM4…	MYC,P38 MAPK,TP53
POU2AF1	transcription regulator		-0.000	bias	2.93E-03	B4GALT1,CD79B,CXCR5,MS4A6A,PLCG1,SPIB
nitroprusside	chemical drug		0.000		3.28E-02	BIRC5,CFLAR,CREB1,TLR2,ZFP91
D-glucose	chemical - endogenous mammalian		-0.052		3.83E-02	ABCA1,ANXA1,CANX,CARS,CCNB1,CD55,CD59,CFLAR,CPD,CREM,DNAJA2,DNAJC3,HMGB1,IDH1,ILK,ITPR3,LDHA,MMP9,NDUFB3,NR3C1,NUP98,PBK,PFKFB3,SOX9,TLR2,UQCRC2
ESRRA	ligand-dependent nuclear receptor		-0.102	bias	1.48E-02	ATP5B,ATP5J2,COX5B,COX7A2L,ENO1,FAM102A,GK,LDHA,LIPA,PGM1,SMARCA4,SOX9
PRDM1	transcription regulator		-0.140		1.93E-02	BCL2A1,CD22,CD86,GALNT2,NLRP12,SPIB,XRCC5
prednisolone	chemical drug		-0.229	bias	1.44E-03	AMBRA1,ARG1,ATG7,BECN1,CEBPD,CFLAR,DAD1,DUSP1,GK,ITGAM,KCTD12,LIMK2,MAPK14,NFIL3,NFKB1,NR3C1,PIK3C3,PTEN,TUBA4A,ZFP36L2	FOS,MAPK8,MYC,P38 MAPK,TP53,prednisolone
heparin	chemical - endogenous mammalian		-0.277		3.21E-02	CD86,IL1R1,MMP9,NDUFA9,PAPPA,VIM
CTGF	growth factor		-0.339	bias	3.43E-02	BCL2A1,BIRC5,CFLAR,DAD1,ENO1,ILK,MMP9
PTEN	phosphatase		-0.504		7.04E-04	ANXA1,AURKA,BIRC5,CCNB1,CCNB2,DUSP1,EZH1,ITPR3,JUND,KLF6,MAPK14,MMP9,NDUFB3,NFIL3,NFKB1,PA2G4,PAPOLA,PCBP2,PGM1,PPP2R5A,PTEN,RAP1A,SMAD2,SMARCA4,SOAT1,STAT5B,TAF10,TRADD,TRAM1	FOS,MYC,P38 MAPK,PTEN,TNF,TP53
4-hydroxytamoxifen	chemical drug		-0.600		4.36E-02	CD55,FOSL2,MAPK14,MINA,NCOA3,PTTG1,RHOBTB2,TNPO1
TXN	enzyme		-0.686		1.79E-02	CD86,MAPK14,MMP9,NFKB1,TXN
CD28	transmembrane receptor		-0.793	bias	3.14E-02	ANXA1,ATP11B,BCL2A1,CD86,CFLAR,CNIH4,CREM,DAD1,FCER1G,GOLGB1,HCCS,IL1R1,ITCH,NFKB1,PGAM1,PTEN,RRAGA,SEC61B,SP1,STOM
Igm	complex		-1.005	bias	7.17E-03	BCL2A1,BIRC5,CD22,CD44,CFLAR,NFKB1,UGCG	Igm,MYC,P38 MAPK,TP53
ADIPOQ	other		-1.051		3.83E-02	ACSM5,ADIPOR2,ARG1,BIRC5,DUSP1,GK,PTEN,SLC2A3,SOAT1
geranylgeranyl pyrophosphate	chemical - endogenous mammalian		-1.091		1.55E-02	ABCA1,BIRC5,CD55,MMP9
fenretinide	chemical drug		-1.309		9.66E-03	BCL2A1,CFLAR,ILK,JAK1,MMP9,PRKAR2A,SP1
miR-17-5p (and other miRNAs w/seed AAAGUGC)	mature microRNA		-1.491	bias	2.00E-02	BIRC5,CREB1,HIPK3,NCOA3,PTEN
CDKN1A	kinase		-1.592		1.93E-02	ARL6IP1,ATRX,AURKA,BIRC5,CCNB1,DUSP1,H2AFZ,HJURP,IL1R1,ITGAM,KIF20A,ORC1,PBK,SOX9,UBE2C
eicosapentenoic acid	chemical drug		-1.601		6.05E-03	CD44,CD86,CEBPD,IL1R1,IL1R2,MMP9,NFKB1,SOAT1,UBE2B	MYC,P38 MAPK,TP53,eicosapentenoic acid
mir-210	microRNA		-1.730	bias	6.57E-03	ACVR1B,FAM102A,GIT2,ISCU,MIB1,NUP210,SDF2,TNPO1,UBQLN1
H89	chemical - kinase inhibitor		-1.782	bias	8.07E-03	ABCA1,CD55,CREB1,CREM,DUSP1,ITPR3,MMP9,NFIL3,SP1,TPH1,TXN	FOS,H89,MYC,P38 MAPK,TNF,TP53
celecoxib	chemical drug		-1.808		1.09E-01	ALOX5,BCL2A1,BIRC5,CFLAR,MMP9,SP1,TLR2
MAPK1	kinase		-1.828		2.05E-02	AIM1,B3GALT4,BIRC5,CD84,CDK19,COX17,CSTA,DUSP1,EMP1,GFOD1,HIC2,JUND,MAPK13,MMP9,ORC1,TRIM25,UBE2C,UBE2I,VIM,ZAK,ZC3HAV1
SATB1	transcription regulator		-1.857		1.06E-02	CDK19,F5,FEZ2,GLRX,IL18RAP,PSMD2,SIPA1L2,TSG101,TUBA4A,VIM
zinc	chemical drug		-1.871		3.43E-02	CCNB1,CD86,ENO1,KPNA2,LIPA,MTF1,SLC39A4
5-fluorouracil	chemical drug		-1.884	bias	1.54E-02	ATP5B,BECN1,CANX,CD86,CFLAR,ECHS1,FKBP1A,LDHA,PSMB5,PSMD2,RPS28,SLA,SLC25A3,SSR4,UBE2C,UQCRC2
trans-hydroxytamoxifen	chemical drug		-1.890		2.24E-01	DUSP1,FOLH1,IL1R1,KLF6,LHFPL2,MPPED2,RAB31
CLDN7	other		-1.912		2.49E-01	APLP2,ASAP1,CKAP4,F5,ITPR3,TIMP2,XXYLT1
miR-291a-3p (and other miRNAs w/seed AAGUGCU)	mature microRNA		-1.915	bias	3.21E-02	CDK11A/CDK11B,GLTP,LATS2,NIN,PBK,STK4,TMEM9B
estrogen receptor	group		-1.937		1.00E00	ANXA1,CD44,CD59,MMP9,PLAUR,TIMP2,VIM
mir-8	other		-1.960	bias	2.05E-03	FTH1,HDAC4,PTEN,SLC25A3,TIMP2
HMOX1	enzyme		-1.964		3.82E-01	BECN1,ITGAM,MAPK14,MMP9
BCL6	transcription regulator		-1.969		2.88E-02	BCL2A1,CD44,CD79B,CXCR5,ENTPD1,FTH1,IL13RA1,NFKB1,PTEN,SOX9
plicamycin	chemical drug		-1.969		5.07E-01	ABCA1,HDAC4,PLAUR,SP1
gefitinib	chemical drug		-1.982		3.52E-02	AURKA,BIRC5,CEBPD,CFLAR,IL1R2,MAP2K6,PLAUR,PTTG1,TIMP2,TLR2,XRCC2
medroxyprogesterone acetate	chemical drug		-1.989		1.13E-01	BIRC5,CCNB1,CCNB2,CD44,PBK,SP1,VCAN
camptothecin	chemical toxicant	Inhibited	-2.000		1.29E-05	AIM1,APPBP2,AURKA,BCL2A1,BIRC5,CASP1,CCNB1,CD22,CD48,CD59,CD86,CD93,CFLAR,CREB1,CXCR5,DLG1,F5,FCAR,FNDC3B,GAPVD1,GIT2,GRIA3,HJURP,IL13RA1,JMJD6,MAP4K4,MMP9,NFKB1,NR3C1,NUMA1,PHF21A,PSMD2,PTEN,RBMS1,RHEB,S100A12,SIPA1L1,SORL1,STAT5B,STK17B,TBL1X,TLR2,TNK2,TPP1,TUBA4A,UBE2A,UGCG,WDFY3	MYC,P38 MAPK,TP53,camptothecin
1'-acetoxychavicol acetate	chemical reagent	Inhibited	-2.000	bias	1.76E-03	BCL2A1,BIRC5,CFLAR,MMP9
lonafarnib	chemical drug	Inhibited	-2.000	bias	2.38E-03	BCL2A1,BIRC5,CFLAR,MMP9
evodiamine	chemical - endogenous non-mammalian	Inhibited	-2.000	bias	7.76E-03	BCL2A1,BIRC5,CFLAR,MMP9
FHIT	enzyme	Inhibited	-2.000	bias	1.55E-02	RAB11A,RAB31,RAB7A,RAC1
TCF3	transcription regulator	Inhibited	-2.000		1.00E00	AURKA,CCNB2,CD79B,IFNAR1,JUND,KIF4A,NFIL3
mir-17	microRNA	Inhibited	-2.177	bias	4.54E-03	ABCA1,FGF9,JAK1,NCOA3,PTEN,SMAD2
mir-451	microRNA	Inhibited	-2.186	bias	1.38E-04	CELF2,PGM1,PPP6C,RAC1,YWHAZ
actinomycin D	chemical drug	Inhibited	-2.190	bias	1.70E-02	ABCA1,AGFG1,BIRC5,CD55,CFLAR,DUSP1,FOSL2,FTH1,IL1R2,ITPR3,PAPPA,PFKFB3,PLAUR,TLR2,UBE2B
silibinin	chemical drug	Inhibited	-2.211	bias	1.94E-02	BIRC5,CCNB1,MMP9,PLAUR,TIMP2,VIM
pregna-4,17-diene-3,16-dione	chemical - endogenous non-mammalian	Inhibited	-2.213	bias	1.64E-03	BCL2A1,BIRC5,CFLAR,MMP9,NFKB1
mir-144	microRNA	Inhibited	-2.400	bias	1.36E-05	ADAM10,CELF2,PGM1,PPP6C,RAC1,YWHAZ
flavopiridol	chemical drug	Inhibited	-2.415	bias	4.54E-03	BIRC5,CCNB1,ITGAM,RHOBTB2,TXN,XRCC5
garcinol	chemical - endogenous non-mammalian	Inhibited	-2.449		1.63E-01	BRAP,ELF4,NFKB1,PTTG1IP,RAB22A,ZAK
let-7a-5p (and other miRNAs w/seed GAGGUAG)	mature microRNA	Inhibited	-2.525	bias	1.65E-02	BIRC5,CALCOCO2,CSDE1,DOCK5,FAM105A,MMP9,RHOG,SPCS3,TRMT1,VIM
wortmannin	chemical - kinase inhibitor	Inhibited	-2.655	bias	2.44E-02	AQP3,BIRC5,CD44,CEBPD,CFLAR,CREB1,CXCL16,ITGAM,MMP9,NFKB1,RAP1A,SP1,VIM
SB203580	chemical - kinase inhibitor	Inhibited	-2.896	bias	9.21E-03	ANXA1,AQP9,ARG1,ATP5J2,BIRC5,CD86,CEBPD,CREB1,DUSP1,ENO1,GK,GLRX,ITGAM,JUND,MAP2K6,MAPK14,MMP9,NFKB1,PLAUR,STK17B,TIMP2,TLR2	CSF2,FOS,MAPK14,MAPK8,MYC,P38 MAPK,SB203580,TNF,TP53
Immunoglobulin	complex	Inhibited	-3.106		2.43E-04	AQP9,BCL2A1,CD86,CRISPLD2,DUSP1,DYSF,ENTPD1,FCER1G,HAL,KCTD12,LILRB1,LILRB3,MMP9,NFIL3,RAB31,S100A12,SLC25A37,TLR2,TLR8,VCAN	Immunoglobulin,MYC,P38 MAPK,TP53
miR-30c-5p (and other miRNAs w/seed GUAAACA)	mature microRNA	Inhibited	-3.162	bias	5.98E-03	ATRX,GALNT1,GPD2,IDH1,NUFIP2,PAFAH1B2,PGM1,RBMS1,SEC62,TMEM59
CD3	complex	Inhibited	-3.168	bias	8.76E-03	ANXA1,AQP3,ATP11B,BCL2A1,BECN1,BIRC5,BRK1,CD44,CD86,CFLAR,CNIH4,CREM,DAD1,FCER1G,FKBP1A,GOLGB1,HCCS,IL1R1,ITCH,JAK1,MAPK1,NFKB1,PA2G4,PCBP2,PGAM1,PTEN,RRAGA,SDF2,SEC61B,SORL1,SP1,STOM,TLR2,TNFRSF25,TRIM25,VDAC2,VDAC3,YY1	CD3,FOS,MYC,P38 MAPK,RAF1,TNF,TP53
curcumin	chemical drug	Inhibited	-3.203		2.73E-02	ABCA1,ALOX5,BIRC5,CCNB1,CD86,CFLAR,CR1,FOSL2,FTH1,GRK6,HMGB1,JUND,MMP9,NFKB1,NOTCH2,PTEN,RGL2,SP1,TLR2
miR-124-3p (and other miRNAs w/seed AAGGCAC)	mature microRNA	Inhibited	-3.214	bias	4.27E-05	ABHD5,ATP6V0E1,B4GALT1,CD164,CD59,CPNE3,ELF4,HEBP2,HTATIP2,INO80C,MAPK14,PGM1,PTBP1,PTTG1IP,RBMS1,SEC11A,SP1,STOM,SYCP1,TMEM248,USP48
PD98059	chemical - kinase inhibitor	Inhibited	-4.349	bias	8.08E-04	ABCA1,ANXA1,BECN1,BIRC5,CCNB1,CD44,CD55,CD86,CEBPD,CFLAR,CREB1,CREM,DUSP1,EMP1,EMP3,ENO1,FTH1,ITGAM,JUND,LAMP2,LDHA,MAPK1,MMP9,PLAUR,SOAT1,STOM,TCOF1,TIMP2,TLR2,TUBA4A,TXN,UQCRC2,VAPA,VCAN,VIM,ZFP36L2	EGF,FOS,MYC,P38 MAPK,PD98059,RAF1,TNF,TP53
CD 437	chemical drug	Inhibited	-4.690	bias	5.79E-05	ARPC2,ATP5B,ATP5L,COX7A2L,ENO1,FTH1,HMGB1,KPNA2,NOP10,PCBP2,PGAM1,PRICKLE4,RBX1,SKP1,SLC25A3,SLC25A37,TXN,UBL5,UGCG,UQCRC2,VDAC2,YWHAZ
methylselenic acid	chemical reagent				1.74E-05	AURKA,B4GALT1,BCL2A1,BIRC5,CCNB1,CCNB2,CD44,CFLAR,CREB1,DNAJC3,JAK1,MAPK1,MAPK14,NFIL3,NFKB1,NREP,PPP2R5A,PTEN,RAB31,SEC24D,SH3BP5,TFDP1,TLR2,TNFRSF25,TUBA4A,UBE2B
phenethyl isothiocyanate	chemical drug				4.31E-05	ATP6V0E1,BIRC5,GOLGA7,H2AFZ,IDH1,JAK1,MGST3,QSOX1,RLIM,TTC1,TXN,TXNL1,UBXN4
Sos	group				6.84E-05	APLP2,AQP3,ASAP1,ATP2C1,B4GALT1,CD44,DEDD,DLG1,GBA,GIT2,HIPK3,KIF1B,KLF6,NFIL3,PTTG1,RAB11FIP1,TBL1X,TPP1,UGCG,YWHAZ,ZAK
n-nitrosomethylbenzylamine	chemical toxicant				9.70E-05	ACTR2,ARPC2,ATP6V0E1,CD44,GOLGA7,H2AFZ,IDH1,LAMP2,MGST3,PPP2R2A,RLIM,RRAGA,TTC1,TXNL1,UBE2C,UBXN4
interferon beta-1a	biologic drug				6.25E-04	ATP5L,COX5B,ENO1,FCER1G,FKBP1A,LILRB3,MMP9,NFIL3,PGAM1,PLAUR,RPS28,S100A12,TRADD,TTC1
VPS26B	transporter				1.84E-03	SORT1,VPS35
USP2	peptidase				1.84E-03	CFLAR,ITCH
cholesterol sulfate	chemical - endogenous mammalian				2.41E-03	ABCA1,FOSL2,JUND
LYN	kinase				2.83E-03	BCL2A1,BIRC5,CD22,CD86,CFLAR,CXCR5,NFKB1,STAT5B	FOS,LYN,MYC,TNF
polyamines	chemical - endogenous non-mammalian				3.74E-03	CD44,PMF1,TLR2
NFYC	transcription regulator				3.94E-03	CCNB1,CCNB2,CSDE1,FTH1,PTTG1,SDF2
AKIRIN2	other				5.35E-03	DUSP1,MMP9
Eotaxin	group				5.35E-03	ITGAM,MAPK1
urotensin II	chemical drug				5.35E-03	ALOX5,SOAT1
CTSD	peptidase				5.35E-03	ABCA1,TXN
mir-154	microRNA				5.35E-03	BIRC5,PTEN
miR-19b-3p (and other miRNAs w/seed GUGCAAA)	mature microRNA				5.35E-03	BIRC5,PTEN
CBFA2T3	transcription regulator				5.35E-03	PFKFB3,PFKFB4
geranylgeranylacetone	chemical drug				5.35E-03	HMGB1,TXN
MIR17HG	other				5.43E-03	CREB1,CXCR5,PTEN
3,5-diiodothyronine	chemical - endogenous mammalian				5.43E-03	ENO1,LDHA,PGM1
PARK7	enzyme				7.51E-03	PTEN,TXN,VIM
RV 538	chemical reagent				7.51E-03	ABCA1,BECN1,LAMP2
N-(3-(aminomethyl)benzyl)acetamidine	chemical reagent				9.61E-03	BIRC5,CASP1,CFLAR,CKAP4,MMP9	FOS,MYC,N-(3-(aminomethyl)benzyl)acetamidine,TNF
Collagen Alpha1	group				1.00E-02	MMP9,PLAUR,TIMP2
GPI	enzyme				1.00E-02	RAC1,STEAP4,VIM
TIMP3	other				1.00E-02	ADAM10,MMP9,VIM
quinacrine	chemical drug				1.00E-02	BIRC5,CFLAR,SP1
repertaxin	chemical drug				1.04E-02	ITGAM,MMP9
Ap2 alpha	group				1.04E-02	ATP6V0E1,PLAUR
PF-3084014	chemical drug				1.04E-02	BIRC5,NR3C1
PODXL	kinase				1.04E-02	MMP9,VIM
DLK1	other				1.04E-02	CCNB1,SOX9
IGBP1	phosphatase				1.04E-02	CASP1,RAC1
YY1AP1	other				1.04E-02	PTEN,YY1
SLC19A1	transporter				1.04E-02	NDRG2,SKP1
fenoldopam	chemical drug				1.04E-02	PPP2R5A,RAC1
CDK4	kinase				1.26E-02	AQP3,ATP6V0E1,AURKA,CDCA2,CLPB,CPNE3,ERI1,HJURP,KIF20A,KIF4A,PTBP3,STOM
xanthine	chemical - endogenous mammalian				1.29E-02	DUSP1,PLAUR,TIMP2
ZNF148	transcription regulator				1.29E-02	COX5B,ITGAM,VIM
ACTB	other				1.29E-02	AURKA,CCNB2,LIMK2
F3	transmembrane receptor				1.32E-02	ARG1,ITGAM,MMP9,PAPOLA
MAX	transcription regulator				1.59E-02	CCNB1,CSDE1,EZH1,FTH1,KLF6,LAMP2,UBE2C,YY1
GNB1	enzyme				1.60E-02	CREM,DUSP1,FOSL2,IL1R2,NFKB1
MST1R	kinase				1.63E-02	ARG1,SMAD2,VIM
wogonin	chemical - endogenous non-mammalian				1.63E-02	ABCA1,BIRC5,CFLAR
inositol	chemical drug				1.68E-02	CD55,CD59
PDE3A	enzyme				1.68E-02	CREM,DUSP1
PPM1B	phosphatase				1.68E-02	CEBPD,SLA
HAS2	enzyme				1.68E-02	CD44,MMP9
ABCB7	transporter				1.68E-02	FTH1,TXN
CDC27	other				1.68E-02	CCNB1,UBE2C
paxilline	chemical - endogenous non-mammalian				1.68E-02	ABCA1,BIRC5
mannan	chemical - endogenous non-mammalian				1.68E-02	IRAK3,TLR2
LMNA	other				1.93E-02	ATP11B,CD93,JUND,LPAR4,MIB1,MLLT10,NUFIP2,PLXDC2,PMF1,RBMS1,STK35,TCIRG1,TMEM183A,WDR33,ZCCHC6
CaMKII	complex				2.00E-02	ARG1,CD44,DLG1
3M-002	chemical reagent				2.00E-02	CD86,MYD88,TLR8
miR-200b-3p (and other miRNAs w/seed AAUACUG)	mature microRNA				2.00E-02	PLCG1,PTEN,VIM
RIPK1	kinase				2.00E-02	CFLAR,NFKB1,SP1
PD 169316	chemical - kinase inhibitor				2.00E-02	ABCA1,ATP5J2,BIRC5
gossypol	chemical toxicant				2.00E-02	BIRC5,CFLAR,NCOA3
methyl 2-cyano-3,12-dioxoolean-1,9-dien-28-oate	chemical drug				2.07E-02	BIRC5,CFLAR,MMP9,SP1
propofol	chemical drug				2.36E-02	ANXA1,BECN1,HMGB1,MMP9
GC-GCR dimer	complex				2.43E-02	ANXA1,DUSP1,IL1R2
IL13RA2	transmembrane receptor				2.45E-02	LILRB3,MMP9
LOXL2	enzyme				2.45E-02	MMP9,VIM
DUSP4	phosphatase				2.45E-02	DUSP1,SMAD2
mir-19	microRNA				2.45E-02	HIPK3,PTEN
RBX1	enzyme				2.45E-02	BIRC5,CCNB1
ARHGDIA	other				2.45E-02	NR3C1,SP1
niflumic acid	chemical drug				2.45E-02	CD86,CFLAR
[Ac-His1,D-Phe2,Lys15,Arg16,Leu27]VIP-(3-7)-GRF-(8-27)	chemical reagent				2.45E-02	CD86,CREB1
geranylgeraniol	chemical - endogenous mammalian				2.45E-02	CD59,RAP1A
glutamine	chemical - endogenous mammalian				2.61E-02	ATF6,CARS,DNAJA2,DUSP1,IDH1,NUP98,VIM
PTTG1	transcription regulator				2.68E-02	CCNB1,CD44,UBE2B,VIM
FASLG	cytokine				2.68E-02	CD44,CFLAR,FTH1,NFKB1
CD14	transmembrane receptor				2.72E-02	BCL2A1,IL13RA1,IL1R1,NFKB1,TLR2
MAPT	kinase				2.88E-02	ATP5B,CANX,ENO1,FKBP1A,MAPK1,NDUFS6,NFKB1,PAFAH1B2,PAK3,PGAM1,PSEN1,SUCLG1,TUBA4A,TXN,UQCRQ,YWHAZ
HSP90B1	other				2.90E-02	CANX,CD86,TLR2
KCNIP3	transcription regulator				2.90E-02	CANT1,CREM,FOSL2
beraprost	chemical drug				3.34E-02	CD86,CREM
Actin	group				3.34E-02	CD44,LPP
voltage-gated calcium channel	complex				3.34E-02	ITGAM,ITPR3
RICTOR	other				3.34E-02	CFLAR,PTEN
ADAM21	peptidase				3.34E-02	DHX32,TFDP1
PRRX1	transcription regulator				3.34E-02	LPP,SOX9
SEL1L	other				3.34E-02	PTEN,TIMP2
miR-24-3p (and other miRNAs w/seed GGCUCAG)	mature microRNA				3.34E-02	ACVR1B,MAPK14
NUP107	transporter				3.34E-02	NUP214,NUP98
LGALS7/LGALS7B	other				3.34E-02	CCNB1,MMP9
PEBP1	other				3.34E-02	CFLAR,YY1
ATF7	transcription regulator				3.34E-02	DUSP1,MAPK14
TSG101	transcription regulator				3.34E-02	NR3C1,TSG101
SCUBE3	other				3.34E-02	MMP9,VIM
LTB4R	G-protein coupled receptor				3.34E-02	ALOX5,MMP9
DIABLO	other				3.34E-02	BIRC5,CFLAR
bupivacaine	chemical drug				3.34E-02	FOSL2,JUND
sertraline	chemical drug				3.34E-02	NR3C1,TPH1
tyrphostin	chemical - other				3.34E-02	ARG1,CFLAR
cucurbitacin B	chemical - endogenous non-mammalian				3.34E-02	BIRC5,CCNB1
perilla alcohol	chemical drug				3.34E-02	BCL2A1,CCNB1
P1,P4-Di(adenosine-5') tetraphosphate	chemical - endogenous mammalian				3.34E-02	NR3C1,TPH1
equol	chemical drug				3.34E-02	CD86,MMP9
HLX	transcription regulator				3.41E-02	CCNB1,CD44,UNC5B
everolimus	chemical drug				3.41E-02	ABCA1,CCNB2,SOAT1
3-nitropropionic acid	chemical toxicant				3.91E-02	ATP6V0E1,GYG1,LDHA,MMP9,SP1
RHOJ	enzyme				3.96E-02	ANXA1,RASA3,SEC62
panobinostat	chemical drug				3.96E-02	CCNB1,VIM,YWHAZ
TSC22D3	transcription regulator				3.96E-02	CD86,DPPA4,TLR2
mir-22	microRNA				3.96E-02	HDAC4,MAPK14,SP1
BTRC	enzyme				3.96E-02	BCL2A1,DLG1,LECT2
7-dehydrocholesterol	chemical - endogenous mammalian				4.29E-02	MAP3K1
L-alpha-lysophosphatidylcholine, stearoyl	chemical - endogenous mammalian				4.29E-02	HMGB1
L-glutamine	chemical - endogenous mammalian				4.29E-02	DUSP1
cortivazol	chemical reagent				4.29E-02	NR3C1
beta-lactose	chemical - endogenous mammalian				4.29E-02	MMP9
etalocib	chemical drug				4.29E-02	ITGAM
hexacosanoyl-coenzyme A	chemical - endogenous non-mammalian				4.29E-02	ALOX5
Ryr	group				4.29E-02	KCNJ2
Plc beta	group				4.29E-02	NFKB1
crizotinib	chemical drug				4.29E-02	VIM
PPME1	enzyme				4.29E-02	PPP2R2A
APOL6	transporter				4.29E-02	BECN1
colestimide	chemical drug				4.29E-02	ABCA1
PREX1	other				4.29E-02	RAC1
LMF1	other				4.29E-02	CANX
NLRP10	other				4.29E-02	ALOX5
SPON2	other				4.29E-02	NFKB1
SPRED2	cytokine				4.29E-02	VIM
ZNF433	other				4.29E-02	ALOX5
LMAN1	other				4.29E-02	F5
CNEP1R1	other				4.29E-02	CTDNEP1
RDH11	enzyme				4.29E-02	NR3C1
TACSTD2	other				4.29E-02	CREB1
TNRC6B	other				4.29E-02	PTEN
HMGN5	transcription regulator				4.29E-02	CCNB1
FUBP3	transcription regulator				4.29E-02	FGF9
ADAMTSL4	other				4.29E-02	MMP9
PTENP1	other				4.29E-02	PTEN
MTX2	transporter				4.29E-02	MTX1
alpha-hederin	chemical reagent				4.29E-02	MMP9
AZD1981	chemical drug				4.29E-02	ITGAM
STX12	other				4.29E-02	ABCA1
CAL-101	chemical drug				4.29E-02	UGCG
HMGN2	other				4.29E-02	SOX9
DOCK1	other				4.29E-02	RAC1
SRRM1	other				4.29E-02	CD44
PSMD9	transcription regulator				4.29E-02	SMAD2
SRSF9	enzyme				4.29E-02	NR3C1
AP2S1	transporter				4.29E-02	ATP6V0E1
ACSL1	enzyme				4.29E-02	ABCA1
FAF1	other				4.29E-02	VIM
RAB27A	enzyme				4.29E-02	CD44
LIPA	enzyme				4.29E-02	ABCA1
Hmgn1	other				4.29E-02	SOX9
TRD	other				4.29E-02	FCER1G
ADAMTS7	peptidase				4.29E-02	SOX9
miR-302b-5p (and other miRNAs w/seed CUUUAAC)	mature microRNA				4.29E-02	BIRC5
mir-302	microRNA				4.29E-02	HDAC4
miR-381-3p (and other miRNAs w/seed AUACAAG)	mature microRNA				4.29E-02	BIRC5
miR-512-3p (and other miRNAs w/seed AGUGCUG)	mature microRNA				4.29E-02	CFLAR
miR-292-3p (and other miRNAs w/seed AGUGCCG)	mature microRNA				4.29E-02	BIRC5
miR-181a-1-3p (and other miRNAs w/seed CCAUCGA)	mature microRNA				4.29E-02	BIRC5
mir-101	microRNA				4.29E-02	DUSP1
mir-542	microRNA				4.29E-02	ILK
mir-463	microRNA				4.29E-02	BIRC5
miR-33-5p (and other miRNAs w/seed UGCAUUG)	mature microRNA				4.29E-02	ABCA1
mir-471	microRNA				4.29E-02	BIRC5
EMILIN1	other				4.29E-02	PTEN
GSTM5	enzyme				4.29E-02	MAPK14
ibrutinib	chemical drug				4.29E-02	UGCG
SNTB1	other				4.29E-02	ABCA1
Acat2/Acat3	enzyme				4.29E-02	ABCA1
Gbp2	enzyme				4.29E-02	MMP9
Ifx	other				4.29E-02	CR1
XAF1	other				4.29E-02	BIRC5
CD151	other				4.29E-02	MMP9
CTSL	peptidase				4.29E-02	BECN1
PAK6	kinase				4.29E-02	MMP9
AURKAIP1	enzyme				4.29E-02	AURKA
KIF3B	transporter				4.29E-02	PYCR2
PAFAH1B2	enzyme				4.29E-02	PAFAH1B1
MUC16	other				4.29E-02	CCNB1
TIAM2	enzyme				4.29E-02	VIM
PLEKHA1	other				4.29E-02	CD86
PAGR1	other				4.29E-02	NR3C1
HNRNPDL	other				4.29E-02	COX5B
SPAG9	other				4.29E-02	MAPK14
ASGR1	transmembrane receptor				4.29E-02	MMP9
PLEKHA2	other				4.29E-02	CD86
CDC23	enzyme				4.29E-02	CCNB1
CREB3	transcription regulator				4.29E-02	MMP9
CDC20	other				4.29E-02	UBE2C
BTG1	transcription regulator				4.29E-02	NR3C1
STARD3	transporter				4.29E-02	ABCA1
GFAP	other				4.29E-02	VIM
ALS2	other				4.29E-02	RAC1
PIGA	enzyme				4.29E-02	CD59
GAA	enzyme				4.29E-02	GYG1
PAFAH1B3	enzyme				4.29E-02	PAFAH1B1
dexamethasone/tobramycin	chemical drug				4.29E-02	TLR2
3-mercaptopicolinic acid	chemical - kinase inhibitor				4.29E-02	NR3C1
BW-755C	chemical drug				4.29E-02	JUND
D-lactic acid	chemical - endogenous mammalian				4.29E-02	ITGAM
PD173955	chemical - kinase inhibitor				4.29E-02	PLAUR
ropivacaine	chemical drug				4.29E-02	ITGAM
hedamycin	chemical reagent				4.29E-02	BIRC5
bisindolylmaleimide III	chemical - kinase inhibitor				4.29E-02	CFLAR
4-cresol	chemical toxicant				4.29E-02	ITGAM
aldesleukin	chemical drug				4.29E-02	CD86
BMS200261	chemical reagent				4.29E-02	CD55
erucic acid	chemical - endogenous non-mammalian				4.29E-02	ALOX5
prostanoid	chemical - other				4.29E-02	ENTPD1
sivelestat	chemical drug				4.29E-02	HMGB1
dihydroxyacetone	chemical - endogenous mammalian				4.29E-02	NR3C1
glucuronic acid	chemical - endogenous mammalian				4.29E-02	SOX9
ferric citrate	chemical drug				4.29E-02	FTH1
tolfenamic acid	chemical drug				4.33E-02	BIRC5,SP1
ZBTB10	other				4.33E-02	BIRC5,SP1
TCIRG1	enzyme				4.33E-02	CD44,CD86
APC (complex)	complex				4.33E-02	CCNB1,UBE2C
CCR9	G-protein coupled receptor				4.33E-02	DHX32,TFDP1
mir-135	microRNA				4.33E-02	CASP1,IL1R1
CD180	other				4.33E-02	BCL2A1,CD86
LCP2	other				4.33E-02	MAPK1,PLCG1
APEX1	enzyme				4.33E-02	ALOX5,FTH1
BTC	growth factor				4.33E-02	ITGAM,MMP9
TNRC6A	other				4.33E-02	LATS2,PTEN
tolbutamide	chemical drug				4.33E-02	AQP3,ITPR3
aplidine	biologic drug				4.33E-02	DUSP1,JUND
ARNT	transcription regulator				4.41E-02	ENO1,ERO1L,GK,KIF20A,TUBA4A,UBE2C,VIM
dacinostat	chemical drug				4.56E-02	BIRC5,CEBPD,CFLAR
MED30	transcription regulator				4.56E-02	COX5B,NDUFA10,NDUFB3
HOXA13	transcription regulator				4.56E-02	ENO1,SOX9,VAPA
SLPI	other				4.56E-02	CD86,HMGB1,SMAD2
bufalin	chemical reagent				4.56E-02	BECN1,ILK,YWHAZ
CLEC11A	growth factor				4.60E-02	ALOX5,ANXA1,BIRC5,LDHA,NFKB1
romidepsin	biologic drug				4.98E-02	CD86,CXADR,DUSP1,MMP9,PLAUR
3h_Male_UpstreamAnalysis
Upstream Regulator	Molecule Type	Predicted Activation State	Activation z-score	Notes	p-value of overlap	Target molecules in dataset	Mechanistic Network
XBP1	transcription regulator	Activated	2.236	bias	3.27E-04	GGCX,MGAT2,RPN2,TFDP1,TRAM1,TXNDC5
IGF1R	transmembrane receptor		0.447		2.22E-03	ATP5J2,CD84,NDUFA9,TFDP1,TMEM87A
CDKN2A	transcription regulator		0.152		1.96E-02	NR3C1,PPFIBP1,TFDP1,VIM
CXCL12	cytokine		0.130		1.16E-04	ATRX,CANX,HNRNPD,RAP1A,VIM,YY1
GnRH analog	biologic drug		-1.342		2.95E-02	C21orf33,GAB1,MTX1,PSMD1,TFDP1
ADAM21	peptidase				5.49E-04	DHX32,TFDP1
CCR9	G-protein coupled receptor				7.30E-04	DHX32,TFDP1
CD53	other				9.35E-04	DHX32,TFDP1
PLN	transporter				2.62E-03	ALDH3A2,RAP1A,VIM
HNF4A	transcription regulator				4.03E-03	AZI2,BRAP,C11orf58,C21orf33,ERLIN1,FLJ11292,GAB1,GGCX,METAP2,MRPL43,PPFIBP1,PPP5C,PPP6C,PSMD1,SMIM12,STAM2,SYMPK,TM9SF2,TMEM87A
cortivazol	chemical reagent				5.19E-03	NR3C1
crizotinib	chemical drug				5.19E-03	VIM
LMF1	other				5.19E-03	CANX
SPRED2	cytokine				5.19E-03	VIM
RDH11	enzyme				5.19E-03	NR3C1
MTX2	transporter				5.19E-03	MTX1
SRSF9	enzyme				5.19E-03	NR3C1
FAF1	other				5.19E-03	VIM
KIF3B	transporter				5.19E-03	PYCR2
TIAM2	enzyme				5.19E-03	VIM
PAGR1	other				5.19E-03	NR3C1
BTG1	transcription regulator				5.19E-03	NR3C1
GFAP	other				5.19E-03	VIM
CALCOCO2	other				5.19E-03	AZI2
3-mercaptopicolinic acid	chemical - kinase inhibitor				5.19E-03	NR3C1
dihydroxyacetone	chemical - endogenous mammalian				5.19E-03	NR3C1
RASSF5	other				7.97E-03	PSMD1,RAP1A
ETV4	transcription regulator				8.58E-03	B4GALT1,VIM
PRKAR1A	kinase				8.58E-03	RAP1A,VIM
SAMM50	other				1.03E-02	MTX1
CHD5	enzyme				1.03E-02	VIM
mir-138	microRNA				1.03E-02	VIM
TNK1	kinase				1.03E-02	RAP1A
DMPK	kinase				1.03E-02	FXYD1
pyridoxal phosphate	chemical - endogenous mammalian				1.03E-02	NR3C1
trehalose	chemical - endogenous mammalian				1.03E-02	VIM
hesperidin	chemical drug				1.55E-02	NR3C1
CFC1/CFC1B	other				1.55E-02	PYCR2
STIL	other				1.55E-02	PYCR2
EFEMP1	enzyme				1.55E-02	VIM
SLC12A6	transporter				1.55E-02	VIM
UBE2L3	enzyme				1.55E-02	NR3C1
mianserin	chemical drug				1.55E-02	NR3C1
2-amino-1-methyl-6-phenylimidazo(4,5-b)pyridine	chemical drug				1.83E-02	G3BP1,RAP1A
GLIPR2	other				2.06E-02	VIM
PF-3084014	chemical drug				2.06E-02	NR3C1
miR-292b-5p (and other miRNAs w/seed CUCAAAA)	mature microRNA				2.06E-02	KPNA4
MRAS	enzyme				2.06E-02	VIM
APAF1	other				2.06E-02	VIM
GRIN2B	ion channel				2.06E-02	PPP5C
PODXL	kinase				2.06E-02	VIM
NME3	kinase				2.06E-02	VIM
DYNC2LI1	other				2.06E-02	PYCR2
YY1AP1	other				2.06E-02	YY1
4-aminophenol	chemical - endogenous mammalian				2.06E-02	VIM
phlorizin	chemical - endogenous non-mammalian				2.57E-02	NR3C1
Ptk	group				2.57E-02	NR3C1
WDR5	enzyme				2.57E-02	VIM
IFT88	other				2.57E-02	PYCR2
RAPGEF1	other				2.57E-02	RAP1A
USP8	peptidase				2.57E-02	STAM2
BCAR3	other				2.57E-02	RAP1A
PCBP1	translation regulator				2.57E-02	HNRNPD
etomidate	chemical drug				2.57E-02	NR3C1
idazoxan	chemical drug				2.57E-02	NR3C1
alpha-hydroxyglutarate	chemical - endogenous mammalian				2.57E-02	VIM
n-nitrosomethylbenzylamine	chemical toxicant				2.78E-02	ALDH3A2,C21orf33,TTC1
PKD2	ion channel				3.07E-02	PYCR2
LOXL2	enzyme				3.07E-02	VIM
MED14	transcription regulator				3.07E-02	NR3C1
PDGF (family)	group				3.07E-02	VIM
ITGA9	other				3.07E-02	VIM
SOX15	transcription regulator				3.07E-02	PYCR2
AIFM1	enzyme				3.07E-02	NDUFA9
MCAM	other				3.07E-02	VIM
ARHGDIA	other				3.07E-02	NR3C1
geranylgeraniol	chemical - endogenous mammalian				3.07E-02	RAP1A
seocalcitol	chemical drug				3.31E-02	G3BP1,SYCP1
heparin	chemical - endogenous mammalian				3.42E-02	NDUFA9,VIM
PARP	group				3.57E-02	VIM
C1orf61	other				3.57E-02	VIM
TCF7L1	transcription regulator				3.57E-02	PYCR2
PEBP1	other				3.57E-02	YY1
TSG101	transcription regulator				3.57E-02	NR3C1
MAD2L2	enzyme				3.57E-02	VIM
SCUBE3	other				3.57E-02	VIM
PCBP2	other				3.57E-02	HNRNPD
PGK1	kinase				3.57E-02	VIM
sertraline	chemical drug				3.57E-02	NR3C1
midostaurin	chemical drug				3.57E-02	VIM
P1,P4-Di(adenosine-5') tetraphosphate	chemical - endogenous mammalian				3.57E-02	NR3C1
PPP3CA	phosphatase				3.76E-02	FXYD1,VIM
methylselenic acid	chemical reagent				3.76E-02	ALDH3A2,B4GALT1,PPP5C,TFDP1
CSNK2A1	kinase				4.07E-02	VIM
CDK5R1	kinase				4.07E-02	MIB1
HGS	other				4.07E-02	STAM2
LPA	other				4.07E-02	NR3C1
ANXA7	ion channel				4.48E-02	NR3C1,TFDP1
salinosporamide A	chemical drug				4.57E-02	YY1
HIST2H3C (includes others)	other				4.57E-02	PIK3R5
MKNK1	kinase				4.57E-02	TFDP1
NCSTN	peptidase				4.57E-02	VIM
HSF4	transcription regulator				4.57E-02	VIM
DL-fructose	chemical - endogenous mammalian				4.57E-02	NR3C1
